# Supplementary material for: A High Density Genetic Map Derived from RAD Sequencing and Its Application in QTL Analysis of Yield-Related Traits in Vigna unguiculata
Source: Front Plant Sci. 2017 Sep 7;8:1544. doi: 10.3389/fpls.2017.01544 (PMC5594218; doi:10.3389/fpls.2017.01544)
Supplement: Supplementary File 1 — SNP positions on the 11 LGs of the genetic map in cowpea. [file DataSheet1.XLS]

## Sheet: LG1
SNP code in LG1	Genetic distance（cM）
M27533	0
M1623	0
M5982	0
M17997	0
M12859	0.426
M4928	0.426
M22124	0.426
M7035	1.043
M15085	1.043
M33179	4.54
M28513	4.54
M28511	5.859
M33180	5.859
M22790	5.859
M26634	6.157
M26636	6.157
M26637	6.157
M27970	6.157
M27967	6.157
M27968	6.157
M20069	6.157
M26635	6.454
M20068	6.454
M12694	6.454
M27251	6.454
M19784	7.072
M6108	7.072
M7244	7.369
M3993	7.369
M7979	7.369
M22791	7.369
M28795	7.369
M4862	7.369
M6333	7.369
M19785	7.369
M1933	7.369
M1934	8.917
M9763	8.917
M16675	8.917
M1500	9.215
M1949	9.215
M11856	9.215
M13827	9.215
M12457	9.215
M12458	9.215
M27969	9.215
M28796	9.215
M7243	9.215
M1973	10.763
M4639	10.763
M19734	10.763
M15523	10.763
M18139	12.013
M19735	12.013
M12120	12.966
M6095	12.966
M17354	12.966
M9711	12.966
M12589	12.966
M12588	12.966
M18206	13.263
M16856	13.263
M4992	13.263
M8284	15.467
M9916	15.467
M1820	16.062
M16855	16.062
M11922	16.062
M11921	17.611
M1230	17.611
M9642	19.159
M6172	19.159
M8619	19.159
M19625	20.409
M10029	20.409
M30080	22.324
M10070	22.324
M12300	23.941
M5715	23.941
M22644	26.085
M1793	26.085
M2792	26.68
M33327	26.68
M11458	27.275
M11459	27.275
M19150	27.275
M6771	27.275
M6772	27.275
M6773	27.275
M6770	27.573
M16587	27.573
M5561	28.466
M12785	28.466
M14220	28.466
M14221	28.466
M14367	29.061
M14368	29.061
M14186	29.061
M21083	29.061
M33213	29.061
M5993	29.359
M21727	29.359
M13710	29.359
M13709	29.359
M33494	29.359
M18289	29.359
M4414	29.656
M5114	29.656
M5113	29.656
M14502	29.656
M14501	29.656
M3822	29.656
M3821	29.656
M20095	29.954
M12247	29.954
M349	29.954
M350	29.954
M8636	29.954
M3507	29.954
M3506	29.954
M6986	30.549
M8779	30.549
M10232	30.549
M10234	30.549
M10233	30.549
M10235	30.549
M9857	30.549
M9856	30.549
M19646	30.549
M8063	30.549
M8064	30.549
M8393	30.549
M8664	30.549
M8663	30.549
M10004	30.549
M238	30.549
M6071	30.549
M6070	30.549
M33223	30.549
M8398	30.549
M4873	30.549
M20134	30.549
M20135	30.549
M1892	30.847
M1893	30.847
M21526	31.442
M21527	31.442
M9895	32.335
M9896	32.335
M11495	32.335
M905	32.93
M904	32.93
M34430	32.93
M2544	32.93
M2543	32.93
M29140	32.93
M29141	32.93
M34212	32.93
M7462	32.93
M7463	32.93
M9899	32.93
M9898	32.93
M9897	32.93
M11496	34.181
M11497	34.181
M7807	34.181
M7808	34.181
M690	34.181
M7806	34.181
M6391	34.181
M6390	34.181
M6392	34.181
M9561	34.181
M9562	34.181
M9559	34.181
M9560	34.181
M16764	34.181
M16765	34.181
M20707	34.181
M20708	34.181
M14990	34.181
M4949	34.181
M4950	34.181
M32493	34.181
M32492	34.181
M12432	34.181
M3515	34.181
M3516	34.181
M11839	34.181
M11840	34.181
M3202	34.181
M1434	34.181
M879	34.181
M880	34.181
M1093	34.181
M1094	34.181
M1095	34.181
M1096	34.181
M5723	34.181
M5724	34.181
M352	34.181
M25251	34.181
M25252	34.181
M5644	34.181
M5821	34.181
M4307	34.181
M1610	34.181
M1611	34.181
M8468	34.181
M32490	34.181
M32491	34.181
M10292	34.181
M32239	34.181
M23845	34.181
M24164	34.181
M13702	34.181
M13703	34.181
M13334	34.181
M13333	34.181
M16588	34.181
M16589	34.181
M6549	34.181
M20207	34.181
M10293	34.181
M34144	34.181
M3286	34.181
M21170	34.181
M21169	34.181
M11493	34.181
M9056	34.181
M9054	34.181
M9055	34.181
M9057	34.181
M11494	34.181
M33066	34.181
M8929	34.181
M8930	34.181
M7318	34.181
M16988	34.181
M16989	34.181
M14281	34.181
M8928	34.181
M10262	34.181
M3710	34.181
M1797	34.181
M140	34.181
M605	34.181
M606	34.181
M27505	34.181
M27504	34.181
M33091	34.181
M6467	34.181
M6468	34.181
M19137	34.181
M19136	34.181
M19620	34.181
M19621	34.181
M7202	34.181
M24766	34.181
M24767	34.181
M6929	34.181
M19327	34.181
M32194	34.181
M32195	34.181
M29345	34.181
M29346	34.181
M24799	34.181
M24798	34.181
M14360	34.181
M14361	34.181
M2955	34.181
M19032	34.181
M19033	34.181
M32327	34.181
M4316	34.181
M16327	34.181
M21863	34.181
M21864	34.181
M2499	34.181
M14497	34.181
M14498	34.181
M20865	34.181
M20614	34.181
M20613	34.181
M1825	34.181
M1826	34.181
M1827	34.181
M1828	34.181
M9087	34.181
M9086	34.181
M2480	34.181
M2481	34.181
M19932	34.478
M19933	34.478
M31501	34.478
M5144	34.478
M5143	34.478
M8289	34.478
M8286	34.478
M8287	34.478
M8290	34.478
M8288	34.478
M2881	34.478
M2882	34.478
M2883	34.478
M7232	34.478
M8474	34.478
M8475	34.478
M11821	34.478
M11822	34.478
M32355	34.478
M2280	34.478
M2279	34.478
M4427	34.478
M25396	34.478
M25394	34.478
M25395	34.478
M13957	34.478
M13958	34.478
M1213	34.478
M10185	34.478
M10186	34.478
M13006	34.478
M13007	34.478
M16272	34.478
M16273	34.478
M17843	34.478
M15405	34.478
M15022	34.478
M15021	34.478
M14097	34.478
M17842	34.478
M17841	34.478
M14096	34.478
M21530	34.478
M22940	34.478
M27841	34.478
M27842	34.478
M21048	34.478
M21049	34.478
M21047	34.478
M10997	34.478
M10998	34.478
M10999	34.478
M32973	34.478
M1571	34.478
M18116	34.478
M32687	34.478
M32686	34.478
M4392	34.478
M4393	34.478
M5945	34.478
M5946	34.478
M5944	34.478
M1801	34.478
M1802	34.478
M12435	34.478
M12436	34.478
M6431	34.478
M3944	34.478
M453	34.478
M454	34.478
M3390	34.478
M3391	34.478
M27337	34.478
M1300	34.478
M1301	34.478
M10334	34.478
M6429	34.478
M6430	34.478
M21575	34.478
M21576	34.478
M222	34.478
M11574	34.478
M14000	34.478
M18256	34.478
M11168	34.478
M18202	34.478
M18257	34.478
M10162	34.478
M10161	34.478
M11665	34.478
M15384	34.478
M29936	34.478
M29935	34.478
M2433	34.478
M20911	34.478
M20912	34.478
M20003	34.478
M13975	34.478
M11562	34.478
M11563	34.478
M27212	34.478
M5223	34.478
M19678	34.478
M19677	34.478
M17130	34.478
M17129	34.478
M17131	34.478
M2762	34.478
M3200	34.478
M3201	34.478
M14243	34.478
M17438	34.478
M30781	34.478
M21749	34.478
M27232	34.478
M26981	34.478
M21654	34.478
M4254	34.478
M12393	34.478
M12394	34.478
M852	34.478
M853	34.478
M30771	34.478
M30752	34.478
M30753	34.478
M6665	34.478
M19201	34.478
M19202	34.478
M9443	34.478
M1812	34.478
M1813	34.478
M6327	34.478
M12178	34.478
M11572	34.478
M11573	34.478
M24901	34.478
M16602	34.478
M16603	34.478
M16604	34.478
M16605	34.478
M20535	34.478
M20536	34.478
M32183	34.478
M32182	34.478
M21507	34.478
M20002	34.478
M14353	34.478
M14352	34.478
M6412	35.074
M6411	35.074
M23432	35.371
M18869	35.371
M17682	35.669
M17683	35.669
M8649	35.669
M8644	35.669
M8173	35.669
M8172	35.966
M10031	35.966
M24215	35.966
M24689	35.966
M22899	35.966
M22900	35.966
M18261	35.966
M18259	35.966
M18260	35.966
M1817	35.966
M22322	35.966
M23397	35.966
M3060	35.966
M23292	35.966
M23293	35.966
M18448	35.966
M18449	35.966
M18451	36.273
M17174	36.273
M17173	36.273
M12149	36.273
M13936	36.273
M13937	36.273
M24463	36.273
M24462	36.273
M10342	36.273
M10341	36.273
M10340	36.273
M7151	36.273
M7152	36.273
M7154	36.273
M7156	36.273
M9372	36.273
M9373	36.273
M22748	36.273
M22749	36.273
M16569	36.273
M16570	36.273
M16568	36.273
M16571	36.273
M3462	36.571
M33199	36.571
M12320	36.571
M8962	36.571
M19766	36.571
M1764	36.571
M20408	36.571
M13464	36.571
M13466	36.571
M13465	36.571
M13467	36.571
M19977	36.571
M26343	36.571
M22313	36.571
M22314	37.166
M20930	37.166
M8215	37.166
M8214	37.166
M8216	37.166
M7033	37.166
M7034	37.166
M21896	37.166
M21897	37.166
M26068	37.166
M11532	37.166
M11533	37.166
M11534	37.166
M11535	37.166
M11531	37.464
M2217	37.464
M24811	37.464
M24302	37.464
M8831	37.464
M8832	37.464
M30590	37.464
M30591	37.464
M14874	37.464
M32761	37.464
M545	37.464
M546	37.464
M3723	37.464
M3724	37.464
M3722	37.464
M10294	37.464
M22833	37.464
M408	37.464
M1861	37.464
M24319	37.761
M24320	37.761
M8647	37.761
M15254	37.761
M15255	37.761
M15253	37.761
M15256	37.761
M4005	37.761
M4006	37.761
M4007	37.761
M4008	37.761
M4009	37.761
M566	37.761
M567	37.761
M568	37.761
M569	37.761
M19410	37.761
M20904	38.357
M22311	38.357
M13275	38.357
M23983	38.357
M5057	38.357
M5058	38.357
M13793	38.357
M22948	38.357
M22496	38.357
M11505	38.357
M13081	38.357
M33821	38.357
M13792	38.357
M16885	38.357
M2798	38.357
M2800	38.357
M22998	38.357
M22999	38.357
M22996	38.357
M22997	38.357
M17458	38.357
M12106	38.654
M12105	38.654
M12469	38.654
M12470	38.654
M15051	38.654
M4651	38.654
M4650	38.654
M32974	38.654
M4054	38.654
M13132	38.654
M13978	38.654
M13979	38.654
M16606	38.654
M14325	38.654
M415	38.654
M16952	38.654
M16953	38.654
M15131	38.654
M12646	38.654
M12647	38.654
M22864	38.654
M22865	38.654
M17653	38.654
M19920	38.654
M19921	38.654
M19919	38.654
M23747	38.654
M19627	38.654
M25287	38.654
M21930	38.654
M21931	38.654
M12384	38.654
M12385	38.654
M5276	38.654
M18346	38.654
M10309	38.654
M26654	38.654
M3401	38.654
M7449	38.654
M19399	38.654
M7512	38.654
M18519	38.654
M28261	38.654
M33453	38.654
M30191	38.654
M30192	38.654
M13148	38.654
M13149	38.654
M13150	38.654
M1013	38.654
M16186	38.654
M16187	38.654
M9125	38.654
M14787	38.654
M14788	38.654
M14786	38.654
M19168	38.654
M10762	38.654
M10761	38.654
M4674	38.654
M6208	38.654
M6207	38.654
M7650	38.952
M996	38.952
M543	38.952
M544	38.952
M14002	38.952
M9246	38.952
M3413	38.952
M3414	38.952
M14623	38.952
M7770	38.952
M17290	38.952
M17291	38.952
M14493	38.952
M19128	38.952
M15343	38.952
M16088	38.952
M16087	38.952
M6736	38.952
M6737	38.952
M8019	38.952
M17483	38.952
M17484	38.952
M17485	38.952
M17486	38.952
M17503	38.952
M17500	38.952
M17501	38.952
M17502	38.952
M1780	38.952
M1779	38.952
M8395	38.952
M8394	38.952
M3305	38.952
M15142	38.952
M15143	38.952
M20629	38.952
M15615	38.952
M15614	38.952
M7138	38.952
M7137	38.952
M11090	38.952
M5836	38.952
M20903	38.952
M6287	38.952
M6288	38.952
M6920	38.952
M26706	38.952
M26707	38.952
M20736	38.952
M13319	38.952
M32159	38.952
M21379	38.952
M14702	38.952
M14703	38.952
M13521	38.952
M2118	38.952
M2119	38.952
M11461	38.952
M2618	38.952
M2619	38.952
M6511	38.952
M6512	38.952
M14066	38.952
M21609	38.952
M13584	38.952
M114	38.952
M115	38.952
M17487	38.952
M14450	38.952
M15246	38.952
M15247	38.952
M15245	38.952
M5745	38.952
M34385	38.952
M34384	38.952
M26330	38.952
M27043	38.952
M27044	38.952
M27532	38.952
M28901	38.952
M30094	38.952
M5923	38.952
M5922	38.952
M5067	38.952
M30328	38.952
M21722	38.952
M21723	38.952
M2617	38.952
M1712	38.952
M340	38.952
M19266	38.952
M17546	38.952
M17547	38.952
M194	38.952
M30366	38.952
M17465	38.952
M31454	38.952
M3613	38.952
M2639	38.952
M2640	38.952
M17318	38.952
M11983	38.952
M5529	38.952
M1572	38.952
M1573	38.952
M19411	38.952
M19412	38.952
M1508	38.952
M13453	38.952
M19169	38.952
M15590	38.952
M15589	38.952
M3308	38.952
M3309	38.952
M19182	38.952
M2058	38.952
M2057	38.952
M17292	38.952
M995	38.952
M20179	38.952
M610	38.952
M609	38.952
M16939	38.952
M14928	38.952
M14929	38.952
M204	38.952
M205	38.952
M19912	38.952
M12071	38.952
M12070	38.952
M33105	38.952
M33106	38.952
M25547	38.952
M32422	38.952
M15152	38.952
M15151	38.952
M15150	38.952
M31105	38.952
M19865	38.952
M19864	38.952
M19352	38.952
M19353	38.952
M29873	38.952
M32226	38.952
M529	38.952
M279	38.952
M280	38.952
M5031	38.952
M32480	38.952
M26279	38.952
M7171	38.952
M7172	38.952
M6398	38.952
M15604	38.952
M33211	38.952
M34466	38.952
M6610	38.952
M6611	38.952
M6930	38.952
M23217	38.952
M4643	38.952
M14713	38.952
M3746	38.952
M16785	38.952
M16786	38.952
M16784	38.952
M16712	38.952
M16713	38.952
M30645	38.952
M5502	38.952
M1370	38.952
M4314	38.952
M4315	38.952
M1369	38.952
M9290	38.952
M397	38.952
M12263	38.952
M12264	38.952
M30449	38.952
M15164	38.952
M15162	38.952
M11025	38.952
M20386	38.952
M31098	38.952
M31099	38.952
M27412	38.952
M27411	38.952
M12635	38.952
M6675	38.952
M18821	38.952
M8415	38.952
M12677	38.952
M7164	38.952
M7161	38.952
M7162	38.952
M7163	38.952
M16823	38.952
M16825	38.952
M16824	38.952
M15082	38.952
M13220	38.952
M13221	38.952
M15344	38.952
M15345	38.952
M4893	38.952
M4892	38.952
M8836	38.952
M8837	38.952
M955	38.952
M954	38.952
M956	38.952
M957	38.952
M8385	38.952
M23216	38.952
M23214	38.952
M23215	38.952
M12607	38.952
M12609	38.952
M12608	38.952
M12606	38.952
M9052	38.952
M9050	38.952
M30595	38.952
M15871	38.952
M15870	38.952
M13502	38.952
M10763	38.952
M20663	38.952
M20664	38.952
M24694	38.952
M24695	38.952
M680	38.952
M679	38.952
M8668	38.952
M15497	38.952
M15498	38.952
M25142	38.952
M17272	38.952
M7980	38.952
M7981	38.952
M11317	38.952
M32105	38.952
M19370	38.952
M10923	38.952
M11451	38.952
M11450	38.952
M15570	38.952
M13131	38.952
M14712	39.249
M16811	39.249
M930	39.249
M931	39.249
M932	39.249
M933	39.249
M23496	39.249
M23498	39.249
M23497	39.249
M32599	39.249
M10928	39.249
M10929	39.249
M2312	39.249
M2313	39.249
M23789	39.249
M1701	39.249
M27863	39.249
M30829	39.249
M11368	39.249
M21367	39.249
M21368	39.249
M21366	39.249
M17778	39.249
M18639	39.249
M18640	39.249
M5767	39.249
M5768	39.249
M32569	39.249
M1588	39.249
M15641	39.249
M15640	39.249
M19918	39.249
M2177	39.249
M2178	39.249
M5853	39.249
M5854	39.249
M5855	39.249
M28197	39.249
M18877	39.249
M18878	39.249
M14800	39.249
M28075	39.249
M163	39.249
M15084	39.845
M209	39.845
M11134	40.44
M1150	40.44
M20267	40.44
M1668	41.035
M1669	41.035
M1667	41.035
M11521	41.035
M11522	41.035
M17822	41.035
M17821	41.035
M16341	41.035
M16340	41.035
M14108	41.035
M934	41.035
M935	41.035
M24250	41.035
M24292	41.035
M24293	41.035
M13218	41.035
M19385	41.035
M19384	41.035
M19386	41.035
M12998	41.035
M3365	41.035
M24312	41.035
M24313	41.035
M24314	41.035
M21037	41.035
M21038	41.035
M15050	41.035
M15052	41.035
M18117	41.63
M1151	41.63
M1152	41.63
M31946	41.63
M11287	41.63
M11286	41.63
M14033	41.63
M14034	41.63
M32711	41.63
M9051	41.63
M18876	42.226
M3747	42.226
M23702	42.523
M20060	42.523
M19543	42.523
M19544	42.523
M208	42.523
M2255	42.523
M25286	42.523
M25651	42.523
M23067	42.523
M6945	42.523
M30473	42.523
M3797	43.416
M3798	43.416
M3796	43.416
M15580	43.416
M6304	43.714
M332	43.714
M9316	43.714
M21298	43.714
M2359	44.309
M2361	44.309
M2360	44.309
M23701	44.309
M5397	44.607
M10878	44.607
M13231	44.607
M13232	44.607
M11807	44.607
M11808	44.607
M11806	44.607
M21515	44.607
M10454	44.607
M14306	44.607
M20059	44.607
M28178	46.811
M15261	46.811
M926	46.811
M5432	46.811
M927	46.811
M31117	46.811
M9318	46.811
M9319	46.811
M8282	46.811
M20987	46.811
M13069	46.811
M13068	46.811
M2998	46.811
M18577	46.811
M1283	46.811
M21113	46.811
M1612	46.811
M27017	46.811
M4890	46.811
M29741	46.811
M30564	46.811
M1915	46.811
M23614	46.811
M6416	46.811
M1423	46.811
M3069	46.811
M3070	46.811
M10214	46.811
M10212	46.811
M18675	46.811
M18676	46.811
M5433	46.811
M27142	47.108
M11063	47.108
M30040	47.406
M26491	47.406
M9391	49.252
M9124	49.252
M26794	49.252
M29979	49.252
M2768	49.252
M778	49.252
M23331	49.252
M21311	49.252
M21312	49.252
M11026	49.252
M11027	49.55
M11028	49.55
M4378	49.55
M4379	49.55
M15336	49.55
M15337	49.55
M10664	49.55
M10666	49.55
M9962	50.502
M21837	50.502
M6147	50.8
M6148	50.8
M32340	51.097
M18392	51.097
M18391	51.097
M3875	51.097
M29314	51.097
M18469	51.097
M18470	51.097
M6146	51.097
M313	52.05
M314	52.05
M24791	52.347
M7631	52.347
M14969	52.347
M30658	52.347
M9491	52.347
M9495	52.347
M9494	52.347
M4593	52.347
M8730	52.347
M8731	52.347
M8729	52.347
M12083	52.347
M7960	52.347
M5334	52.347
M5335	52.347
M2170	52.645
M9995	52.645
M9996	52.645
M6441	52.952
M12209	52.952
M14395	54.5
M6413	54.5
M9515	54.5
M11788	54.5
M11787	54.5
M32389	54.5
M30545	54.5
M694	54.5
M2254	54.5
M17952	54.5
M4113	54.5
M12551	54.5
M7342	54.5
M12269	54.5
M16139	54.5
M20781	54.5
M21540	54.5
M21541	54.5
M8470	54.5
M8469	54.5
M21206	54.5
M7393	54.5
M7394	54.5
M18452	54.5
M18453	54.5
M17633	54.5
M5658	54.5
M2830	54.5
M1692	54.5
M1691	54.5
M33285	54.798
M9516	54.798
M9517	54.798
M13286	54.798
M22459	54.798
M13287	54.798
M4277	54.798
M5388	54.798
M5387	54.798
M14044	54.798
M21829	54.798
M839	54.798
M11323	54.798
M12195	54.798
M11703	54.798
M14857	54.798
M14856	54.798
M1617	54.798
M4215	54.798
M20636	54.798
M8218	54.798
M8219	54.798
M3609	54.798
M3608	54.798
M3607	54.798
M3610	54.798
M1275	54.798
M1276	54.798
M1416	54.798
M1418	54.798
M1419	54.798
M1417	54.798
M18266	54.798
M18267	54.798
M18268	54.798
M18269	54.798
M2393	54.798
M2394	54.798
M19523	54.798
M19524	54.798
M806	54.798
M12141	54.798
M12904	55.691
M12903	55.691
M178	55.691
M17475	55.691
M18911	55.691
M1026	55.691
M1027	55.691
M1028	55.691
M1029	55.691
M10724	55.691
M1221	55.691
M14814	55.691
M1547	55.691
M9214	55.691
M9213	55.691
M9212	55.691
M9211	55.691
M17548	55.691
M3701	55.691
M13041	55.988
M13040	55.988
M5646	55.988
M5647	55.988
M19242	55.988
M19418	56.286
M12957	56.286
M10075	56.286
M4154	56.286
M4994	56.286
M1649	56.583
M1650	56.583
M20037	56.583
M2827	56.583
M2826	56.583
M23946	56.583
M23945	56.583
M14149	56.583
M14146	56.583
M22113	56.583
M22114	56.583
M32397	56.583
M31921	56.583
M14009	56.583
M14346	56.583
M14344	56.583
M16755	56.583
M805	56.583
M33768	56.583
M102	56.583
M15165	56.583
M21328	56.583
M21327	56.583
M21326	56.583
M21329	56.583
M1562	56.881
M1561	56.881
M1560	56.881
M10613	56.881
M4448	56.881
M22401	56.881
M14127	56.881
M14128	56.881
M9937	56.881
M4308	56.881
M4309	56.881
M20472	56.881
M20473	56.881
M23665	56.881
M12230	56.881
M12231	56.881
M12229	56.881
M12232	57.179
M12233	57.179
M6608	57.179
M6190	57.179
M15980	57.179
M46	57.179
M45	57.179
M15981	57.179
M27440	57.179
M17802	57.179
M1277	57.179
M20252	57.179
M20253	57.179
M4988	57.179
M4989	57.179
M24552	57.179
M5907	57.179
M7651	57.179
M7652	57.179
M8030	57.179
M8031	57.179
M15101	57.179
M15099	57.179
M5788	57.179
M4918	57.179
M14657	57.179
M15500	57.179
M13261	57.179
M13302	57.476
M13303	57.476
M13304	57.476
M5949	57.476
M15793	57.476
M15677	57.476
M5543	57.476
M15997	57.476
M8875	57.476
M5125	57.476
M5122	57.476
M5127	57.476
M5126	57.476
M5123	57.476
M5124	57.476
M1149	57.476
M14869	57.476
M11704	57.476
M19213	57.476
M32865	57.476
M32864	57.476
M9717	57.476
M9716	57.476
M9265	57.476
M32246	57.476
M8904	57.476
M8903	57.476
M8905	57.476
M14047	57.476
M14048	57.476
M14049	57.476
M21828	57.476
M21827	57.476
M32643	57.476
M22365	57.476
M19419	57.476
M24311	57.476
M1042	57.476
M9154	57.476
M20266	57.476
M17943	57.476
M1368	57.476
M1366	57.476
M12482	57.476
M15678	57.476
M15679	57.476
M22463	57.476
M22462	57.476
M22461	57.476
M1513	57.476
M1514	57.476
M21554	57.476
M9575	57.476
M9576	57.476
M12344	57.476
M1367	57.476
M2142	57.476
M2143	57.476
M2144	57.476
M8787	57.476
M7009	57.476
M7008	57.476
M5648	57.476
M8586	57.476
M15129	57.476
M27410	57.476
M8473	57.476
M11288	57.476
M11036	57.476
M16431	57.476
M4052	57.476
M1441	57.774
M1443	57.774
M1444	57.774
M1442	57.774
M13360	57.774
M32060	57.774
M32059	57.774
M13134	57.774
M8123	57.774
M17178	57.774
M2506	57.774
M2507	57.774
M18157	57.774
M18156	57.774
M7198	57.774
M5899	57.774
M5900	57.774
M5435	57.774
M11594	57.774
M11595	57.774
M33387	57.774
M33386	57.774
M7503	57.774
M7504	57.774
M7501	57.774
M7502	57.774
M17505	57.774
M5898	57.774
M17644	57.774
M17645	57.774
M17676	57.774
M8206	57.774
M8207	57.774
M28168	57.774
M10837	57.774
M5611	57.774
M5610	57.774
M24770	57.774
M24771	57.774
M12911	57.774
M2336	57.774
M351	57.774
M21009	57.774
M21008	57.774
M19044	57.774
M19045	57.774
M12617	57.774
M12618	57.774
M1703	57.774
M1704	57.774
M1705	57.774
M18287	57.774
M15163	57.774
M21147	57.774
M14345	57.774
M10778	57.774
M3061	57.774
M3062	57.774
M13403	57.774
M13404	57.774
M15805	57.774
M21766	57.774
M414	57.774
M19133	57.774
M21562	57.774
M21563	57.774
M20487	57.774
M20488	57.774
M15709	57.774
M15708	57.774
M17636	57.774
M17988	57.774
M9107	57.774
M6654	57.774
M6655	57.774
M669	57.774
M670	57.774
M14165	57.774
M14166	57.774
M13427	57.774
M4206	57.774
M4207	57.774
M9155	57.774
M19856	57.774
M538	57.774
M537	57.774
M203	57.774
M19152	57.774
M14448	58.369
M7312	58.369
M2505	58.369
M11393	58.369
M11394	58.369
M19138	58.369
M19139	58.369
M19140	58.369
M19141	58.369
M10484	58.667
M10485	58.667
M16151	58.667
M16152	58.667
M16153	58.667
M16154	58.667
M2239	58.667
M2238	58.667
M3460	58.667
M22941	58.667
M1583	58.667
M24551	59.917
M27371	59.917
M5431	59.917
M24547	60.215
M27286	60.215
M7247	60.215
M7248	60.512
M23085	60.512
M16564	60.512
M28292	60.512
M28745	60.512
M32722	60.512
M14219	60.512
M30229	60.512
M30231	60.512
M18614	60.512
M27287	61.108
M15262	61.108
M7749	61.108
M31116	61.108
M24549	61.108
M30230	61.108
M18613	61.108
M28253	61.108
M5434	61.405
M24546	61.405
M27372	61.405
M23076	61.405
M9390	61.405
M24550	61.405
M28744	62
M7750	62
M31998	62.953
M23075	62.953
M16563	62.953
M24548	62.953
M5372	62.953
M5373	62.953
M27278	62.953
M3383	62.953
M3385	62.953
M3386	62.953
M3384	63.846
M19645	63.846
M10430	63.846
M10428	63.846
M10427	63.846
M10429	63.846
M10431	63.846
M2184	65.692
M2185	65.692
M2183	65.692
M8086	65.692
M8087	65.692
M8088	65.692
M8084	66.942
M8085	66.942
M9466	68.192
M9467	68.192
M8789	68.788
M12712	68.788
M17034	69.681
M20693	69.681
M13493	69.681
M14584	69.681
M14585	69.681
M12022	69.681
M650	69.681
M4336	69.681
M4335	69.681
M4337	69.681
M18330	69.681
M18331	69.681
M3887	69.681
M8228	69.681
M17617	70.276
M17618	70.276
M10319	70.276
M11767	70.276
M11766	70.276
M5888	70.276
M5837	70.276
M1894	70.276
M6180	70.276
M17196	70.574
M7802	70.574
M7803	70.574
M7800	70.574
M7801	70.574
M28505	70.574
M11236	70.574
M11237	70.574
M11238	70.574
M21774	70.574
M21775	70.574
M13893	70.574
M13892	70.574
M21418	70.574
M20606	70.574
M1146	70.574
M897	70.574
M11872	70.574
M11873	70.574
M14586	70.574
M28723	70.574
M7224	70.574
M22107	70.574
M22108	70.574
M22109	70.574
M22110	70.574
M22111	70.871
M21692	70.871
M3446	70.871
M14203	70.871
M4606	70.871
M4607	70.871
M4608	70.871
M15	70.871
M16	71.169
M14202	71.169
M18393	71.169
M3928	71.169
M21162	71.169
M21161	71.169
M21160	71.169
M6981	71.169
M6982	71.169
M6980	72.062
M28774	72.062
M3671	72.062
M14123	72.657
M10071	72.657
M19299	72.657
M19298	72.657
M11149	72.657
M2518	72.657
M2519	72.657
M5633	73.252
M8465	73.252
M4550	73.252
M12253	73.252
M33627	73.252
M4789	73.252
M33628	73.252
M21833	74.145
M21834	74.145
M21832	74.145
M14521	74.145
M11969	74.145
M11970	74.145
M17405	74.145
M17406	74.443
M8281	74.443
M20578	74.741
M33280	74.741
M33281	74.741
M23815	75.038
M32041	75.038
M32040	75.038
M22765	75.038
M14669	75.038
M14668	75.336
M14667	75.336
M27997	77.182
M27999	77.182
M27998	77.182
M4481	80.281
M2265	80.281
M22236	82.127
M5370	82.127
M5371	82.425
M13986	82.425
M13983	82.425
M13984	82.425
M22838	82.425
M22837	82.425
M6200	82.425
M6201	83.675
M6199	83.675
M6924	84.27
M6925	84.27
M2893	84.27
M19699	84.27
M19700	84.27
M17070	84.27
M17069	84.27
M17067	84.27
M17068	84.27
M9484	84.27
M9485	84.27
M237	84.27
M236	84.27
M19233	84.27
M19234	84.27
M22043	84.27
M22040	84.27
M22041	84.27
M22042	84.27
M10376	84.27
M10377	84.27
M22103	84.27
M22104	84.27
M23231	84.27
M23232	84.27
M1855	84.27
M1856	84.27
M14818	84.27
M24145	84.27
M4715	84.27
M4716	84.27
M33418	84.27
M23425	84.27
M31418	84.27
M31419	84.27
M12961	84.27
M18097	84.27
M18098	84.27
M18030	84.27
M20800	84.27
M18924	84.27
M18923	84.27
M5332	84.27
M21069	84.27
M21070	84.27
M21071	84.27
M21068	84.27
M16517	84.27
M4096	84.27
M4097	84.27
M985	84.27
M5998	84.27
M4095	84.27
M15521	84.27
M15520	84.27
M4963	84.27
M2864	84.27
M23774	84.27
M23773	84.27
M4241	84.27
M4240	84.27
M4239	84.27
M8050	84.27
M13754	84.27
M13331	84.27
M13332	84.27
M15380	84.27
M15381	84.27
M1574	84.27
M12526	84.27
M5889	84.27
M9503	84.27
M16463	84.568
M14829	84.568
M14830	84.568
M19887	84.568
M16887	84.568
M12605	84.568
M12604	84.568
M21973	84.568
M21972	84.568
M21220	84.568
M21221	84.568
M21222	84.568
M12297	84.568
M12298	84.568
M12299	84.568
M12296	84.568
M16992	84.866
M16990	84.866
M16991	84.866
M30671	84.866
M26951	84.866
M6521	84.866
M6227	84.866
M6228	84.866
M390	84.866
M16406	84.866
M12652	84.866
M12651	84.866
M9438	85.461
M24746	85.461
M24747	85.461
M16405	85.461
M2689	85.461
M29193	85.461
M29194	85.461
M27179	85.758
M27178	85.758
M598	85.758
M4232	85.758
M4233	85.758
M4234	85.758
M23994	85.758
M3888	85.758
M3889	85.758
M6132	85.758
M6961	85.758
M20978	85.758
M9653	85.758
M1382	85.758
M330	85.758
M3343	85.758
M3344	85.758
M3341	85.758
M3342	85.758
M30468	85.758
M30469	85.758
M10148	85.758
M28775	85.758
M20232	85.758
M20233	85.758
M9925	85.758
M9654	85.758
M24061	85.758
M11013	85.758
M11012	85.758
M13749	85.758
M13750	85.758
M1381	85.758
M7451	85.758
M5472	85.758
M5473	85.758
M6260	85.758
M6261	85.758
M6258	85.758
M6259	85.758
M12520	85.758
M12523	85.758
M12522	85.758
M12521	85.758
M6618	85.758
M6617	85.758
M3521	85.758
M3522	85.758
M3523	85.758
M3520	85.758
M33095	85.758
M14576	85.758
M14575	85.758
M11637	85.758
M11636	85.758
M13262	85.758
M21287	85.758
M25295	85.758
M25294	85.758
M15144	85.758
M6705	85.758
M6706	86.056
M20295	86.056
M20296	86.056
M20293	86.056
M20294	86.056
M16254	86.056
M3268	86.056
M16396	86.056
M15621	86.056
M15622	86.056
M15620	86.056
M11602	86.056
M11603	86.056
M11604	86.056
M11605	86.056
M14906	86.056
M14907	86.056
M20442	86.056
M16747	86.056
M16748	86.056
M16749	86.056
M16746	86.056
M14704	86.056
M6852	86.056
M13066	86.056
M7275	86.056
M7276	86.056
M7277	86.056
M14315	86.056
M6657	86.056
M15914	86.354
M15913	86.354
M7703	86.354
M7704	86.354
M8179	86.354
M17231	86.354
M17232	86.354
M13977	86.354
M15915	86.354
M19857	86.354
M32181	86.354
M29061	86.354
M15581	86.354
M15639	86.354
M14313	86.354
M14314	86.354
M15452	86.354
M15453	86.354
M4962	86.354
M4961	86.354
M13330	86.354
M22611	86.354
M7416	86.354
M6409	86.354
M6410	86.354
M14683	86.354
M19867	86.354
M19868	86.354
M19871	86.354
M19870	86.354
M19869	86.354
M13116	86.354
M13117	86.354
M16355	86.651
M16354	86.651
M14682	86.651
M9113	86.651
M16255	86.949
M14761	86.949
M6069	86.949
M6066	86.949
M6067	87.544
M6068	87.544
M5911	87.842
M5912	87.842
M12531	87.842
M12532	87.842
M9915	88.139
M9914	88.139
M9890	88.139
M16635	88.139
M11714	88.139
M11713	88.139
M578	88.139
M579	88.139
M577	88.139
M4757	88.139
M1816	88.139
M6256	88.139
M6257	88.139
M21065	88.139
M21067	88.139
M21064	88.139
M21066	88.139
M1869	88.139
M1870	88.139
M1871	88.139
M21371	88.139
M21370	88.139
M21372	88.139
M1880	88.139
M1881	88.139
M1878	88.139
M1879	88.139
M30777	88.446
M24731	88.446
M28398	88.446
M28399	88.446
M26685	88.446
M19183	88.744
M19184	88.744
M23654	88.744
M24364	89.041
M3983	89.041
M3982	89.041
M3984	89.041
M3985	89.041
M18981	89.041
M32341	89.041
M11107	89.041
M12653	89.041
M17837	89.041
M23182	89.041
M23183	89.041
M23184	89.041
M31824	89.041
M24482	89.041
M24480	89.041
M24481	89.041
M6693	89.041
M4056	89.041
M4057	89.041
M1440	89.041
M2598	89.041
M8637	89.041
M5192	89.041
M14607	89.041
M6496	89.041
M2199	89.041
M21020	89.041
M7216	89.041
M7217	89.041
M7218	89.041
M7219	89.041
M4767	89.041
M4768	89.041
M4769	89.041
M4770	89.041
M2218	89.041
M2219	89.041
M18946	89.041
M19383	89.041
M5252	89.041
M5253	89.041
M5250	89.041
M5251	89.041
M5249	89.041
M2879	89.041
M2880	89.041
M1845	89.041
M25497	89.041
M25498	89.041
M15991	89.339
M15992	89.339
M1217	89.339
M1219	89.339
M1218	89.339
M1220	89.339
M33367	89.339
M33368	89.339
M20870	89.339
M20871	89.339
M6629	89.339
M2200	89.339
M2201	89.339
M19260	89.339
M19259	89.339
M10678	89.339
M8352	90.887
M19731	90.887
M929	91.84
M26490	91.84
M32204	93.09
M15342	93.09
M1187	93.09
M1084	93.09
M17033	93.09
M1191	93.09
M1190	93.09
M402	93.09
M401	93.09
M2514	93.09
M2515	93.09
M4720	93.09
M4722	93.09
M4721	93.09
M11351	93.09
M11352	93.09
M771	93.09
M12453	93.09
M12454	93.09
M12455	93.09
M898	93.09
M18673	93.09
M18674	93.09
M17032	93.09
M1815	93.09
M1814	93.09
[truncated: 1,344 more rows]

## Sheet: LG2
SNP code in LG2	Genetic distance（cM）
M12981	0
M18442	0
M31641	0
M31642	0
M28777	0
M28778	0
M28776	0
M27508	0
M27509	0
M27510	0.297
M27507	0.297
M10883	2.123
M10884	2.123
M10882	2.123
M18018	3.144
M18019	3.144
M7379	5.715
M7380	5.715
M6297	7.034
M6293	7.034
M6292	8.88
M6294	8.88
M17098	11.322
M14337	11.322
M14335	11.917
M14336	11.917
M24366	13.763
M16845	13.763
M3186	14.359
M11263	14.359
M8617	14.359
M31990	14.359
M11011	14.359
M4456	14.656
M18626	14.656
M17065	14.656
M9187	14.656
M14245	14.954
M18950	14.954
M29564	14.954
M29565	14.954
M29566	14.954
M13836	14.954
M13837	14.954
M9112	14.954
M31573	14.954
M15899	15.252
M30711	15.252
M8325	15.549
M10307	15.549
M10306	15.549
M12150	15.549
M12151	15.549
M5539	15.549
M8326	15.549
M8327	15.847
M4079	15.847
M17743	15.847
M5248	17.991
M18636	17.991
M18637	17.991
M29069	17.991
M29072	17.991
M29070	18.289
M29071	18.289
M27390	18.289
M27391	18.289
M27284	18.289
M27285	18.289
M27282	18.289
M27283	18.289
M27389	18.289
M27392	18.289
M27926	18.289
M27927	18.289
M27928	18.289
M27945	18.884
M27946	18.884
M27947	18.884
M27948	18.884
M28903	18.884
M28906	18.884
M28904	18.884
M28905	18.884
M25976	18.884
M25977	19.181
M25978	19.181
M29584	19.181
M29586	19.181
M29585	19.181
M28077	19.181
M28078	19.181
M28076	19.181
M28079	19.181
M29183	19.777
M29184	19.777
M29182	19.777
M32142	21.325
M32143	21.325
M11119	21.325
M32466	21.325
M7225	21.325
M16880	21.325
M4184	21.622
M4185	21.622
M28988	21.622
M28989	21.622
M28987	21.92
M30495	21.92
M7687	21.92
M7688	21.92
M7689	21.92
M33293	21.92
M33296	21.92
M33295	22.218
M33294	22.218
M26641	22.515
M26642	22.515
M26643	24.361
M11945	24.361
M30173	24.361
M30172	24.361
M30174	24.361
M28028	24.361
M28029	24.957
M28030	24.957
M21203	24.957
M21204	24.957
M21202	24.957
M16545	25.68
M16546	25.68
M17749	25.68
M17750	25.68
M17751	26.275
M17753	26.275
M17752	26.573
M21205	26.573
M29808	26.871
M29806	26.871
M29807	27.168
M19425	27.168
M19427	27.168
M19426	27.168
M26556	27.168
M26558	27.168
M26555	27.168
M26557	27.168
M17094	27.168
M17093	27.168
M3572	27.168
M21313	27.168
M21314	27.168
M29836	27.168
M29837	27.168
M29838	27.168
M29839	27.168
M29340	27.466
M29341	27.466
M29338	27.466
M29339	27.466
M19391	27.466
M6761	27.466
M12368	27.466
M11082	28.716
M24413	28.716
M8391	28.716
M8390	28.716
M8392	28.716
M10619	29.014
M10621	29.014
M10620	29.609
M10618	29.609
M26240	30.859
M26241	30.859
M26242	30.859
M9692	31.455
M9693	31.455
M13539	31.752
M32015	31.752
M5425	31.752
M19049	31.752
M19050	31.752
M266	31.752
M17539	31.752
M17538	31.752
M267	31.752
M21686	31.752
M27408	31.752
M27409	31.752
M32782	31.752
M30608	31.752
M19618	31.752
M24431	31.752
M24432	31.752
M4850	31.752
M26058	31.752
M26059	31.752
M26060	31.752
M18936	31.752
M31552	31.752
M4429	31.752
M10116	31.752
M13843	31.752
M13844	31.752
M13842	31.752
M21728	31.752
M5627	31.752
M33356	32.05
M33355	32.05
M32314	32.05
M2567	32.05
M7064	32.05
M6752	32.05
M23318	32.05
M23316	32.05
M23317	32.05
M11356	32.05
M6355	32.347
M12075	32.347
M12076	32.347
M12077	32.347
M14081	32.347
M7410	32.347
M27452	32.347
M27453	32.347
M27451	32.347
M7351	32.347
M7350	32.347
M8380	32.943
M8379	32.943
M15465	32.943
M18836	32.943
M18835	32.943
M13092	32.943
M20861	32.943
M8083	32.943
M21902	32.943
M21904	32.943
M21903	32.943
M23546	32.943
M13021	32.943
M23860	32.943
M26188	32.943
M26186	32.943
M26185	32.943
M26187	32.943
M29436	32.943
M29438	32.943
M29437	33.24
M17746	33.24
M3906	33.24
M3905	33.24
M19610	33.24
M7516	33.24
M7517	33.24
M7518	33.24
M7551	33.24
M18612	33.24
M18934	33.24
M18935	33.24
M21732	33.24
M13039	33.538
M13038	33.538
M12367	33.538
M29198	33.538
M26999	33.538
M26998	33.538
M27000	33.538
M4939	33.538
M22933	33.836
M22931	33.836
M22932	33.836
M9624	33.836
M6653	33.836
M6652	33.836
M19252	33.836
M19303	33.836
M14083	33.836
M14082	33.836
M27494	33.836
M27495	33.836
M27496	33.836
M27497	33.836
M29206	33.836
M29207	35.384
M29205	35.384
M26001	35.384
M26002	35.384
M26000	35.384
M4134	35.384
M4135	35.384
M26962	35.384
M26963	35.384
M17269	35.384
M3031	35.681
M3030	35.681
M28724	35.681
M28725	35.681
M28726	35.681
M10757	35.681
M10756	35.681
M5051	35.681
M9847	35.681
M7226	35.681
M19253	35.681
M9752	35.681
M9751	35.681
M6619	35.681
M11979	35.681
M26064	35.681
M26065	35.681
M20992	36.277
M17273	36.277
M17274	37.527
M5269	37.527
M5268	37.527
M32033	37.527
M20743	37.527
M20742	37.527
M6856	37.527
M750	37.527
M751	37.527
M27777	37.527
M27776	37.527
M27778	37.527
M27779	37.527
M18898	37.527
M16542	37.527
M14354	37.527
M13179	37.527
M30600	37.527
M32039	37.527
M9747	37.527
M17270	37.527
M17271	37.527
M7598	37.527
M7599	37.527
M16954	37.527
M27396	37.527
M27397	37.824
M19424	37.824
M6621	38.122
M26421	38.122
M26420	38.717
M12745	38.717
M12746	39.61
M2432	39.61
M31456	39.61
M23749	41.456
M23750	41.456
M23748	42.707
M19522	42.707
M19521	42.707
M19520	43.004
M23829	43.004
M1374	43.6
M20528	43.6
M20529	43.6
M20526	43.6
M20527	43.6
M16462	43.897
M19598	43.897
M8695	43.897
M15175	43.897
M15176	44.195
M6144	44.195
M24865	44.195
M24866	44.492
M9174	44.492
M10896	44.79
M10897	44.79
M6818	44.79
M6817	44.79
M29964	45.385
M33077	45.385
M23621	45.683
M10038	45.683
M10039	45.683
M5913	45.683
M5914	45.683
M20236	45.683
M21075	45.683
M21052	45.683
M8975	45.683
M9077	45.683
M9076	45.683
M27951	45.683
M30014	45.683
M30012	45.683
M30013	45.683
M29725	45.683
M29727	45.683
M29726	45.683
M29363	45.683
M29362	45.683
M14457	45.683
M4039	45.683
M16385	45.683
M16388	45.683
M16387	45.683
M16386	45.683
M6707	45.683
M4354	45.683
M4938	45.683
M28000	45.683
M17319	45.683
M32413	45.683
M32414	45.683
M29771	45.683
M29769	45.683
M29770	45.683
M29772	45.683
M29004	45.683
M29005	45.683
M29003	45.683
M31957	45.683
M10361	45.683
M20101	45.683
M4382	45.683
M4383	45.683
M9537	45.683
M21269	45.683
M6962	45.683
M6963	45.683
M18162	45.683
M18163	45.683
M21268	45.683
M27649	45.683
M9577	45.683
M31080	45.683
M28714	45.683
M17561	45.683
M17560	45.683
M4723	45.683
M4724	45.683
M4726	45.683
M4725	45.683
M16596	45.683
M20825	45.683
M20826	45.683
M16686	45.683
M13595	45.683
M13596	45.683
M13597	45.683
M29810	45.683
M32241	45.683
M14812	45.683
M9545	45.683
M9546	45.683
M9544	45.683
M17373	45.683
M19129	45.683
M19130	45.683
M28517	45.683
M4353	45.683
M4352	45.683
M15388	45.683
M1707	45.683
M1706	45.683
M19711	45.683
M19712	45.683
M5140	45.683
M7333	45.683
M16078	45.683
M16079	45.683
M7332	45.683
M818	45.683
M476	45.683
M21812	45.683
M22196	45.683
M22197	45.683
M16047	45.683
M4980	45.683
M32910	45.683
M29708	45.683
M29709	45.683
M32233	45.683
M621	45.683
M16680	45.683
M16679	45.683
M11898	45.683
M13212	45.683
M13213	45.683
M518	45.683
M519	45.683
M1711	45.683
M1710	45.683
M2366	45.683
M13557	45.683
M14207	45.683
M4754	45.683
M14017	45.683
M7621	45.683
M5906	45.683
M14010	45.683
M3333	45.683
M5018	45.683
M5019	45.683
M12310	45.683
M16734	45.683
M16735	45.683
M13194	45.683
M4920	45.683
M12517	45.683
M11802	45.683
M11803	45.683
M6320	45.683
M6821	45.683
M6822	45.683
M6823	45.683
M31837	45.683
M3518	45.683
M31093	45.683
M26946	45.683
M31580	45.683
M20849	45.683
M28345	45.683
M11475	45.683
M11476	45.683
M11474	45.683
M11381	45.683
M14568	45.683
M14567	45.683
M14520	45.683
M8283	45.683
M9418	45.683
M31693	45.683
M28557	45.683
M18841	45.683
M18839	45.683
M11248	45.683
M18532	45.683
M27675	45.683
M16858	45.683
M5493	45.683
M18926	45.683
M18748	45.683
M11058	45.683
M11059	45.683
M13675	45.683
M7267	45.683
M6311	45.683
M4972	45.683
M4973	45.683
M4221	45.683
M4222	45.683
M6622	45.683
M8237	45.683
M10978	45.683
M10976	45.683
M10977	45.683
M10979	45.683
M4546	45.683
M16962	45.683
M31795	45.683
M31796	45.683
M21339	45.683
M21742	45.683
M21743	45.683
M6956	45.683
M6957	45.683
M8072	45.683
M8671	45.683
M8631	45.683
M2888	45.683
M5514	45.683
M21587	45.683
M25247	45.683
M25248	45.683
M14184	45.683
M14183	45.683
M21658	45.683
M21659	45.683
M20201	45.683
M20202	45.683
M3736	45.683
M4624	45.683
M4625	45.683
M27596	45.683
M27597	45.683
M21004	45.683
M23554	45.683
M746	45.683
M33578	45.683
M19577	45.683
M23810	45.683
M12794	45.683
M20790	45.683
M5726	45.683
M29372	45.683
M6339	45.683
M32539	45.683
M21656	45.683
M21657	45.683
M21347	45.683
M19446	45.683
M26445	45.683
M12302	45.683
M23587	45.683
M3119	45.683
M22942	45.683
M3249	45.683
M27336	45.683
M8974	45.683
M24448	45.683
M9061	45.683
M8796	45.683
M16210	45.683
M16212	45.683
M16213	45.683
M27027	45.683
M8324	45.683
M13649	45.683
M9645	45.683
M25954	45.683
M28419	45.683
M28420	45.683
M29681	45.683
M29680	45.683
M11377	45.683
M4558	45.683
M31664	45.683
M29300	45.683
M33545	45.683
M9655	45.683
M9656	45.683
M30708	45.683
M30709	45.683
M4286	45.683
M4287	45.683
M23700	45.683
M23709	45.683
M11971	45.683
M4822	45.683
M5983	45.683
M23710	45.683
M24078	45.683
M24079	45.683
M33638	45.683
M5891	45.683
M17154	45.683
M15760	45.683
M15761	45.683
M13621	45.683
M13622	45.683
M12830	45.683
M5044	45.683
M12829	45.683
M3654	45.683
M1791	45.683
M31917	45.683
M474	45.683
M7966	45.683
M10492	45.683
M32828	45.683
M33011	45.683
M32930	45.683
M18033	45.683
M18034	45.683
M17020	45.683
M5358	45.683
M32638	45.683
M32639	45.683
M6524	45.683
M6525	45.683
M6526	45.683
M5142	45.683
M5141	45.683
M5730	45.683
M30506	45.683
M21578	45.683
M16638	45.683
M4235	45.683
M14974	45.683
M12962	45.683
M26797	45.683
M27029	45.683
M27028	45.683
M22164	45.683
M22163	45.683
M29463	45.683
M1580	45.683
M1581	45.683
M27378	45.683
M21266	45.683
M16870	45.683
M14298	45.683
M10935	45.683
M10936	45.683
M764	45.683
M22429	45.683
M13394	45.683
M13395	45.683
M19607	45.683
M19605	45.683
M19604	45.683
M19606	45.683
M11672	45.683
M9684	45.683
M32012	45.683
M11932	45.683
M20357	45.683
M31395	45.683
M31396	45.683
M21363	45.683
M19535	45.683
M19536	45.683
M26889	45.683
M32697	45.683
M28225	45.683
M22248	45.683
M33123	45.683
M33051	45.683
M14236	45.683
M6777	45.683
M14533	45.683
M4105	45.683
M4104	45.683
M24343	45.683
M16902	45.683
M16795	45.683
M20448	45.683
M20449	45.683
M20117	45.683
M1837	45.683
M30534	45.683
M31737	45.683
M32031	45.683
M32032	45.683
M34188	45.683
M34187	45.683
M3195	45.683
M26102	45.683
M26103	45.683
M26104	45.683
M34146	45.683
M29056	45.683
M29055	45.683
M29057	45.683
M22024	45.683
M22023	45.683
M3567	45.683
M2187	45.683
M2188	45.683
M17441	45.683
M12311	45.683
M19829	45.683
M780	45.683
M13109	45.683
M13110	45.683
M7992	45.683
M7991	45.683
M6358	45.683
M28316	45.683
M30620	45.683
M5302	45.683
M21733	45.683
M19055	45.683
M32173	45.683
M781	45.683
M12706	45.683
M1729	45.683
M10391	45.683
M10390	45.683
M5381	45.683
M22555	45.683
M3830	45.683
M16339	45.683
M9650	45.683
M23045	45.683
M20170	45.683
M31669	45.683
M310	45.683
M5951	45.683
M5950	45.683
M21876	45.683
M21875	45.683
M14489	45.683
M10223	45.683
M25189	45.683
M602	45.683
M28585	45.683
M17748	45.683
M23457	45.683
M8198	45.683
M12361	45.683
M12390	45.683
M18300	45.683
M19006	45.683
M17255	45.683
M18945	45.683
M18944	45.683
M1654	45.683
M1655	45.683
M17256	45.683
M8507	45.683
M10585	45.683
M10584	45.683
M436	45.683
M437	45.683
M26720	45.683
M26721	45.683
M6951	45.683
M16666	45.683
M19546	45.683
M16155	45.683
M10405	45.683
M19185	45.683
M1427	45.683
M9587	45.683
M3204	45.683
M3205	45.683
M4823	45.683
M71	45.683
M70	45.683
M72	45.683
M7261	45.683
M1983	45.683
M19716	45.683
M12048	45.683
M16443	45.683
M9496	45.683
M19159	45.683
M19792	45.683
M11195	45.683
M18168	45.683
M9821	45.683
M2873	45.683
M18847	45.683
M18846	45.683
M10541	45.683
M10540	45.683
M9950	45.683
M6728	45.683
M5571	45.683
M478	45.683
M477	45.683
M19407	45.683
M19408	45.683
M19409	45.683
M5526	45.683
M21246	45.683
M4777	45.683
M14983	45.683
M12124	45.683
M32299	45.683
M12001	45.683
M12002	45.683
M32395	45.683
M32396	45.683
M8972	45.683
M2495	45.683
M18088	45.683
M17210	45.683
M12349	45.683
M11410	45.683
M20651	45.683
M8143	45.683
M7434	45.683
M7435	45.683
M33309	45.683
M7433	45.683
M17267	45.683
M31980	45.683
M31979	45.683
M19995	45.683
M19999	45.683
M5538	45.683
M10577	45.683
M13633	45.683
M2641	45.683
M2934	45.683
M15321	45.683
M2391	45.683
M2392	45.683
M15801	45.683
M15802	45.683
M15803	45.683
M8542	45.683
M27173	45.683
M28626	45.683
M28627	45.683
M28628	45.683
M31470	45.683
M9270	45.683
M21228	45.683
M7997	45.683
M22609	45.683
M16867	45.683
M16868	45.683
M15182	45.683
M14121	45.683
M13515	45.683
M13514	45.683
M20864	45.683
M14389	45.683
M14390	45.683
M15628	45.683
M18372	45.683
M13765	45.683
M13766	45.683
M13767	45.683
M13768	45.683
M17692	45.683
M15006	45.683
M15005	45.683
M10050	45.683
M21168	45.683
M2725	45.683
M21028	45.683
M32787	45.683
M20726	45.683
M16190	45.683
M3426	45.683
M3427	45.683
M30494	45.683
M21820	45.683
M2611	45.683
M18102	45.683
M14551	45.683
M15996	45.683
M12670	45.683
M7630	45.683
M8250	45.683
M9712	45.683
M14633	45.683
M9383	45.683
M13071	45.683
M13072	45.683
M13073	45.683
M31234	45.683
M32519	45.683
M2779	45.683
M2780	45.683
M1215	45.683
M32075	45.683
M3862	45.683
M20752	45.683
M4173	45.683
M21950	45.683
M18429	45.683
M23901	45.683
M23023	45.683
M31262	45.683
M31261	45.683
M15059	45.683
M1671	45.683
M2778	45.683
M22583	45.683
M20456	45.683
M26553	45.683
M27335	45.981
M22761	45.981
M31777	45.981
M4110	45.981
M4111	45.981
M15932	45.981
M5876	45.981
M4695	45.981
M19283	45.981
M32764	45.981
M22467	45.981
M22466	45.981
M1838	46.576
M19027	46.576
M17556	46.576
M4259	46.576
M11786	46.576
M18650	46.576
M15987	46.576
M3857	46.576
M21295	46.576
M21296	46.576
M21297	46.576
M31432	46.576
M11951	46.576
M4554	46.576
M19210	46.576
M16800	46.576
M12304	46.576
M12303	46.576
M29747	46.576
M147	46.576
M2586	46.576
M23832	46.576
M23833	46.576
M23834	46.576
M3902	46.576
M11652	46.576
M11651	46.576
M11653	46.576
M11314	46.576
M11315	46.576
M6574	46.576
M23118	46.576
M23119	46.576
M43	46.576
M2010	46.576
M2008	46.576
M4501	46.576
M4502	46.576
M8023	47.171
M11600	47.171
M10160	47.171
M6626	47.171
M9737	47.171
M13470	47.171
M13469	47.171
M5879	47.171
M5878	47.171
M17258	47.171
M17257	47.171
M34238	47.171
M27342	47.171
M20615	47.171
M357	47.171
M20256	47.171
M28654	47.171
M28655	47.171
M28656	47.171
M30292	47.171
M15190	47.171
M15189	47.171
M15188	47.171
M5193	47.171
M5194	47.171
M18661	47.171
M18662	47.171
M18660	47.171
M18663	47.171
M18976	47.469
M24068	47.469
M24070	47.469
M24069	47.469
M5762	47.469
M23062	47.469
M3655	47.766
M14621	47.766
M10107	47.766
M10106	47.766
M8323	47.766
M18840	47.766
M6004	47.766
M6005	47.766
M405	47.766
M406	47.766
M19186	47.766
M19187	47.766
M1170	47.766
M13662	47.766
M16220	47.766
M11601	47.766
M32496	47.766
M18366	47.766
M15548	47.766
M20625	47.766
M18874	47.766
M32601	47.766
M18873	47.766
M3605	47.766
M17051	47.766
M12363	47.766
M34009	47.766
M14791	47.766
M21098	47.766
M21099	47.766
M13960	47.766
M2154	47.766
M2153	47.766
M4200	47.766
M17331	47.766
M10510	47.766
M14479	47.766
M8734	47.766
M94	47.766
M1955	47.766
M13581	47.766
M21514	47.766
M21513	47.766
M26277	47.766
M26276	47.766
M30570	47.766
M30571	47.766
M23092	47.766
M12807	47.766
M11104	47.766
M11103	47.766
M11102	47.766
M17908	47.766
M17909	47.766
M25696	47.766
M25697	47.766
M4914	47.766
M4524	47.766
M10881	47.766
M18852	47.766
M18853	47.766
M14841	47.766
M5668	47.766
M978	47.766
M21574	47.766
M7787	47.766
M7788	47.766
M7785	47.766
M7786	47.766
M13284	47.766
M21718	47.766
M20157	47.766
M16080	47.766
M18713	47.766
M8659	47.766
M8658	47.766
M10524	47.766
M28046	47.766
M28047	47.766
M19413	47.766
M2488	47.766
M17838	47.766
M18484	47.766
M11863	47.766
M11862	47.766
M4930	47.766
M9035	47.766
M13461	47.766
M248	47.766
M30695	47.766
M30694	47.766
M27585	47.766
M19974	47.766
M20208	47.766
M4518	47.766
M20247	47.766
M3986	47.766
M3987	47.766
M13445	47.766
M12726	47.766
M6735	47.766
M26403	47.766
M3849	47.766
M19381	47.766
M1626	47.766
M1643	47.766
M10108	47.766
M16806	47.766
M431	47.766
M5875	47.766
M20598	47.766
M31852	47.766
M15690	47.766
M17558	47.766
M17559	47.766
M7638	47.766
M13648	47.766
M4373	47.766
M15285	47.766
M8167	47.766
M20164	47.766
M20163	47.766
M27405	47.766
M26046	47.766
M8399	47.766
M32658	47.766
M18764	47.766
M3006	47.766
M11449	47.766
M1447	47.766
M11326	47.766
M1790	47.766
M23966	47.766
M16561	47.766
M16562	47.766
M20226	47.766
M20227	47.766
M18531	47.766
M33158	47.766
M14752	47.766
M28761	47.766
M28760	47.766
M28762	47.766
M28759	47.766
M10366	47.766
M10793	47.766
M21822	47.766
M23948	47.766
M23949	47.766
M19435	48.064
M10676	48.064
M1675	48.064
M1139	48.064
M1140	48.064
M1137	48.064
M1138	48.064
M15662	48.064
M15663	48.064
M15664	48.064
M15665	48.064
M14440	48.064
M3634	48.064
M3633	48.064
M608	48.064
M16258	48.064
M19953	48.064
M19954	48.064
M28496	48.064
M28495	48.064
M28493	48.064
M28494	48.064
M27485	48.064
M30407	48.064
M30406	48.064
M27483	48.064
M27484	48.064
M27486	48.064
M33141	48.064
M33140	48.064
M26206	48.064
M26207	48.064
M26918	48.064
M28583	48.064
M28582	48.064
M28802	48.064
M28799	48.064
M28800	48.064
M28801	48.064
M29843	48.064
M23539	48.064
M33278	48.064
M33279	48.064
M3421	48.064
M30456	48.064
M13365	48.064
M20753	48.064
M8217	48.064
M9968	48.064
M9969	48.064
M15806	48.064
M4561	48.064
M4458	48.064
M4820	48.064
M7447	48.064
M7446	48.064
M21877	48.064
M21487	48.064
M12444	48.064
M20099	48.064
M16214	48.064
M7869	48.064
M19154	48.064
M19155	48.064
M19153	48.064
M13733	48.064
M31600	48.064
M15792	48.064
M11823	48.064
M11824	48.064
M617	48.064
M12443	48.064
M5892	48.064
M14499	48.064
M3728	48.064
M2663	48.064
M11754	48.064
M4986	48.064
M32802	48.064
M26523	48.064
M26521	48.064
M26522	48.064
M25167	48.064
M3709	48.064
M4013	48.064
M4012	48.064
M7734	48.064
M3416	48.064
M3417	48.064
M11109	48.064
M22017	48.064
M22018	48.064
M12754	48.064
M8137	48.064
M8139	48.064
M8140	48.064
M8138	48.064
M18749	48.064
M20299	48.064
M21655	48.064
M18499	48.064
M28647	48.064
M6928	48.064
M18961	48.064
M14922	48.064
M14923	48.064
M6420	48.064
M876	48.064
M32703	48.064
M32704	48.064
M27666	48.064
M27667	48.064
M27668	48.064
M27665	48.064
M26476	48.064
M26477	48.064
M26478	48.064
M27848	48.064
M27846	48.064
M27847	48.064
M32324	48.064
M34758	48.064
M1584	48.064
M21144	48.064
M16853	48.064
M18216	48.064
M29046	48.064
M30585	48.064
M28355	48.064
M4755	48.064
M4756	48.064
M2813	48.064
M5602	48.064
M30288	48.064
M6950	48.064
M2587	48.064
M30447	48.064
M9305	48.064
M9306	48.064
M12217	48.064
M14388	48.064
M17549	48.064
M17550	48.064
M17551	48.064
M15488	48.064
M5119	48.064
M1624	48.064
M1625	48.064
M761	48.064
M12034	48.064
M11439	48.064
M11440	48.064
M16531	48.064
M4182	48.064
M379	48.064
M10041	48.064
M30560	48.064
M21991	48.064
M21992	48.064
M23951	48.064
M23952	48.064
M5747	48.064
M4884	48.064
M4885	48.064
M4883	48.064
M13933	48.064
M6845	48.064
M2632	48.064
M28048	48.064
M10807	48.064
M9926	48.064
M15710	48.064
M15712	48.064
M15711	48.064
M15713	48.064
M15714	48.064
M15715	48.064
M3496	48.064
M3495	48.064
M27092	48.064
M27093	48.064
M27094	48.064
M13732	48.064
M15917	48.064
M15688	48.064
M15689	48.064
M29816	48.064
M16219	48.064
M13966	48.064
M11998	48.064
M11999	48.064
M20058	48.064
M31682	48.064
M3104	48.064
M3258	48.064
M3259	48.064
M26488	48.064
M26489	48.064
M17742	48.064
M9170	48.064
M9171	48.064
M17511	48.064
M17512	48.064
M18864	48.064
M4159	48.064
M5616	48.064
M16316	48.064
M249	48.064
M15468	48.064
M12395	48.064
M26921	48.064
M26922	48.064
M14711	48.064
M14356	48.064
M14357	48.064
M14355	48.064
M11622	48.064
M11623	48.064
M11624	48.064
M27803	48.064
M27804	48.064
M27805	48.064
M27806	48.064
M31888	48.064
M21938	48.064
M2918	48.064
M16762	48.064
M19602	48.064
M4743	48.064
M26047	48.064
M12852	48.362
M32652	48.362
M32653	48.362
M8489	48.362
M8488	48.362
M15816	48.362
M2410	48.362
M9287	48.362
M18306	48.362
M18307	48.362
M19775	48.362
M5263	48.362
M17782	48.362
M16201	48.362
M8095	48.362
M5396	48.362
M5395	48.362
M20081	48.362
M12279	48.362
M10357	48.362
M5187	48.362
M5603	48.362
M9462	48.362
M9463	48.362
M10076	48.362
M16278	48.362
M16279	48.362
M16276	48.362
M16277	48.362
M12025	48.362
M5020	48.362
M6623	48.362
M30445	48.362
M5965	48.362
M11106	48.362
M20396	48.362
M27503	48.362
M32332	48.362
M5495	48.362
M26554	48.362
M26552	48.362
M7710	48.362
M2207	48.362
M2208	48.362
M2206	48.362
M3635	48.362
M18925	48.362
M18927	48.362
M4374	48.362
M4375	48.362
M3864	48.362
M20349	48.362
M28111	48.362
M28110	48.362
M14491	48.362
M11621	48.362
M20504	48.362
M20503	48.362
M31719	48.362
M31720	48.362
M16027	48.362
M7871	48.362
M2123	48.362
M1244	48.362
M11411	48.362
M6142	48.362
M6143	48.362
M32273	48.362
M2843	48.362
M20300	48.362
M12622	48.362
M12621	48.362
M12623	48.362
M12624	48.362
M14748	48.362
M14749	48.362
M21804	48.362
M21803	48.362
M8859	48.362
M11291	48.362
M11292	48.362
M12577	48.362
M4727	48.362
M17262	48.362
M17263	48.362
M28907	48.362
M3927	48.362
M15094	48.362
M32800	48.362
M32801	48.362
M21939	48.362
M28208	48.362
M28209	48.362
M28211	48.362
M28210	48.362
M31878	48.362
M31092	48.362
M12472	48.362
M12473	48.362
M13108	48.362
M3197	48.362
M5362	48.362
M5363	48.362
M116	48.362
M30646	48.362
M10877	48.362
M33401	48.362
M1315	48.362
M28975	48.362
M28976	48.362
M2610	48.362
M2521	48.362
M20886	48.362
M17591	48.362
M17590	48.362
M4516	48.362
M4517	48.362
M15367	48.362
M244	48.362
M30485	48.362
M6909	48.362
M10060	48.362
M32280	48.362
M32281	48.362
M10061	48.362
M16944	48.362
M26532	48.362
M26533	48.362
M30353	48.362
M30626	48.362
M30627	48.362
M17906	48.362
M28492	48.362
M29145	48.362
M10668	48.362
M12863	48.362
M12800	48.362
M12801	48.362
M29485	48.362
M29483	48.362
M29484	48.362
M2963	48.362
M10189	48.362
M3208	48.362
M3207	48.362
M9616	48.362
M9617	48.362
M2095	48.362
M20867	48.362
M28734	48.362
M28732	48.362
M28733	48.362
M32754	48.362
M5803	48.362
M5804	48.362
M5805	48.362
M20190	48.362
M32048	48.362
M32049	48.362
M32442	48.362
M21506	48.362
M21504	48.362
M20474	48.362
M28088	48.362
M28090	48.362
M28089	48.362
M7728	48.362
M13064	48.362
M10498	48.362
M15229	48.362
M15230	48.362
M5975	48.362
M33447	48.362
M13189	48.362
M8097	48.362
M31712	48.362
M6911	48.362
M5628	48.362
M10636	48.362
M6160	48.362
M32809	48.362
M18371	48.362
M2802	48.362
M27674	48.362
M4581	48.362
M4582	48.362
M1682	48.362
M21505	48.362
M7983	48.659
M17488	48.659
M302	48.659
M3909	48.659
M3908	48.659
M1462	48.659
M14182	48.659
M20774	48.659
M10766	48.659
M13161	48.659
M13160	48.659
M9611	48.957
M10505	48.957
M10506	48.957
M24460	48.957
M24461	48.957
M23811	48.957
M23812	48.957
M11785	48.957
M22824	48.957
M22825	49.254
M22826	49.254
M756	49.254
M755	49.254
M23742	49.254
M4120	49.254
M22045	49.254
M14480	49.254
M14481	49.254
M17757	49.254
M14807	49.254
M14806	49.254
M16560	49.254
M9244	49.254
M12893	49.254
M12894	49.254
M8776	49.254
M21340	49.254
M14987	49.552
M14744	49.552
M1994	49.85
M5048	49.85
M5049	49.85
M5047	49.85
M15666	49.85
M15667	49.85
M19211	49.85
M19212	49.85
M11899	49.85
M11501	49.85
M11500	50.147
M14136	50.147
M5050	50.147
M17878	50.147
M17879	50.147
M295	50.147
M23864	50.445
M23865	50.445
M19927	50.743
M19929	50.743
M19928	50.743
M10638	50.743
M16650	51.993
M16651	51.993
M15030	52.588
M26340	52.588
M26341	52.588
M26342	52.588
M28817	52.588
M28818	52.588
M28819	52.588
M26039	52.588
M26041	52.886
M26040	52.886
M21000	52.886
M21001	52.886
M20999	53.481
M7249	53.481
M29750	53.481
M29748	53.481
M29749	53.481
M27214	53.481
M27215	53.481
M27216	53.481
M27213	53.481
M27498	53.481
M27499	53.481
M27500	53.481
M30015	53.481
M30016	53.481
M30017	53.481
M28757	53.481
M28755	53.779
M28756	53.779
M3191	53.779
M3192	53.779
M3193	53.779
M28576	53.779
M28577	53.779
M28578	53.779
M26529	53.779
M26530	53.779
M26531	53.779
M27895	53.779
M27893	53.779
M27894	53.779
M29286	53.779
M29287	53.779
M29288	53.779
M26127	53.779
M26128	53.779
M26129	53.779
M29433	53.779
M29434	53.779
M29435	53.779
M12398	55.327
M21337	55.327
M21338	55.922
M4984	55.922
M13411	55.922
M9253	56.517
M29301	56.517
M26945	56.815
M25177	56.815
M13410	56.815
M17738	56.815
M9252	56.815
M4511	57.41
M4512	57.41
M15822	57.41
M21100	57.41
M21101	57.41
M21002	57.41
M21003	57.41
M14078	57.41
M19149	57.41
M14077	57.41
M15769	57.41
M32421	57.41
M12942	57.41
M12943	57.41
M14525	57.41
M20884	57.41
M32796	57.41
M32797	57.41
M8541	57.41
M15696	57.41
M18252	57.41
M18253	57.41
M11502	57.41
M9075	57.41
M2451	57.41
M4875	57.41
M10990	57.41
M5393	57.41
M16362	57.41
M17409	57.41
M4786	57.41
M21196	57.41
M18648	57.41
M18647	57.41
M784	57.41
M785	57.41
M31930	57.41
M21174	57.41
M31821	57.41
M14213	57.41
M16665	57.41
M4416	57.41
M16449	57.41
M16450	57.41
M14540	57.41
M14541	57.41
M27609	57.41
M27610	57.41
M27611	57.41
M1766	57.41
M2039	57.41
M2040	57.41
M2038	57.41
M28244	57.41
M28245	57.41
M30509	57.41
M30508	57.41
M16644	57.41
M13988	57.41
M13989	57.41
M28342	57.41
M28343	57.41
M1945	57.41
M14811	57.41
M16592	57.41
M16593	57.41
M4882	57.41
M5055	57.41
M17110	57.41
M17112	57.41
M10105	57.41
M3919	57.41
M3920	57.41
M10353	57.41
M33049	57.41
M9251	57.41
M16529	57.41
M16528	57.41
M17563	57.41
M17401	57.41
M1285	57.41
M1286	57.41
M12172	57.41
M12173	57.41
M32535	57.41
M14773	57.41
M10441	57.41
M12941	57.41
M20431	57.41
M12817	57.41
M20284	57.41
M20285	57.41
M27594	57.41
M27593	57.41
M8158	57.41
M8157	57.41
M2623	57.41
M2622	57.41
M7049	57.41
M485	57.41
M19392	57.41
M6362	57.41
M4728	57.41
M31244	57.41
M31245	57.41
M31246	57.41
M17043	57.41
M17042	57.41
M28998	57.41
M19148	57.708
M19147	57.708
M21434	57.708
M21433	57.708
M29913	57.708
M29915	57.708
M30636	57.708
M33075	57.708
M23015	57.708
M23016	57.708
M9787	57.708
M9788	57.708
M359	57.708
M23332	57.708
M23333	57.708
M19229	57.708
M23564	57.708
M3601	57.708
M1937	57.708
M1938	57.708
M1936	57.708
M23083	57.708
M23082	57.708
M13551	57.708
M3622	57.708
M9859	57.708
M33590	57.708
M25926	57.708
M32724	57.708
M32725	57.708
M25925	57.708
M25927	57.708
M3621	57.708
M3620	57.708
M30384	57.708
M30385	57.708
M28748	57.708
M28746	57.708
M28747	57.708
M30175	57.708
M30176	57.708
M33537	57.708
M5996	57.708
M5997	57.708
M1958	57.708
M18510	57.708
M2009	57.708
M31531	57.708
M13363	57.708
M13362	57.708
M16448	57.708
M16877	57.708
M17983	57.708
M17138	57.708
M14432	57.708
M22796	57.708
M22795	57.708
M4880	57.708
M4879	57.708
M32008	57.708
M32009	57.708
M32010	57.708
M2441	57.708
M18445	57.708
M18444	57.708
M10920	57.708
M18251	57.708
M19615	57.708
M29683	57.708
M29684	57.708
M14777	57.708
M14778	57.708
M9764	57.708
M18887	57.708
M18889	57.708
M18888	57.708
M29914	57.708
M33076	57.708
M14222	57.708
M14223	57.708
M28645	57.708
M29449	57.708
M29450	57.708
M2423	57.708
M4515	57.708
M4514	57.708
M1392	57.708
M32045	57.708
M32046	57.708
M2411	57.708
M32822	57.708
M32823	57.708
M2076	57.708
M18823	57.708
M464	57.708
M465	57.708
M32007	57.708
M14774	57.708
M14775	57.708
M12841	57.708
M17581	57.708
M13481	57.708
M13482	57.708
M13480	57.708
M30520	57.708
M30521	57.708
M6361	57.708
M20260	57.708
M20261	57.708
M14673	57.708
M32167	57.708
M9266	57.708
M9267	57.708
M17439	57.708
M17440	57.708
M14194	57.708
M14195	57.708
M23585	57.708
M23584	57.708
M9060	57.708
M8973	58.005
M24118	58.005
M32547	58.005
M8824	58.005
M8857	58.005
M24117	58.005
M8825	58.005
M12088	58.005
M9074	58.005
M8856	58.303
M28039	58.303
M28040	58.303
M5591	58.303
M12089	58.303
M9073	58.303
M5592	58.303
M40	58.303
M28041	58.303
M13899	58.601
M4614	58.601
M13663	58.898
M2089	58.898
M2090	58.898
M22442	59.493
M22443	59.493
M615	59.493
M616	59.493
M5576	60.089
M5577	60.089
M5578	60.089
M5579	60.089
M15768	60.089
M15125	60.089
M16247	60.089
M20265	60.089
M817	60.089
M293	60.089
M6527	60.089
M31676	60.089
M18880	60.089
[truncated: 1,265 more rows]

## Sheet: LG3
SNP code in LG3	Genetic distance（cM）
M22631	0
M13028	0
M16790	0
M16791	0
M6121	1.25
M20734	1.25
M1670	2.403
M10574	2.403
M10573	3.931
M22345	3.931
M22346	5.16
M15501	5.16
M6793	8.88
M7424	8.88
M5040	12.039
M22507	12.039
M20855	12.336
M20854	12.336
M6908	12.336
M7050	15.794
M13340	15.794
M14086	17.044
M19916	17.044
M16326	17.64
M22481	17.64
M22482	17.64
M22483	17.937
M5850	17.937
M5851	18.533
M19917	18.533
M6189	18.533
M445	18.83
M21601	18.83
M21600	18.83
M21599	19.783
M12934	19.783
M10308	19.783
M15332	20.378
M16054	20.378
M16053	23.905
M16052	23.905
M3897	26.407
M31584	26.407
M15524	28.68
M13840	28.68
M13839	29.632
M10515	29.632
M3097	29.632
M18149	29.632
M18148	29.632
M870	29.632
M8752	29.93
M19805	29.93
M19804	29.93
M25259	29.93
M25260	29.93
M10820	29.93
M2004	30.227
M282	30.227
M18730	30.227
M32929	30.227
M1469	30.227
M18771	30.823
M16417	30.823
M16416	30.823
M19880	30.823
M19881	31.418
M16753	31.418
M16754	31.418
M19188	31.418
M19693	32.013
M19694	32.013
M14514	32.966
M5751	32.966
M19889	34.812
M13245	34.812
M13246	35.407
M19888	35.407
M5551	35.407
M19782	35.705
M19783	35.705
M7384	35.705
M18726	35.705
M13090	35.705
M13089	35.705
M18500	35.705
M18501	35.705
M12689	35.705
M11516	35.705
M15827	35.705
M15828	35.705
M15825	35.705
M15826	35.705
M11515	35.705
M17	35.705
M18329	35.705
M18328	35.705
M9068	36.657
M9069	36.657
M6133	36.657
M2935	36.657
M2936	36.657
M12136	36.657
M12137	36.657
M20039	36.657
M12812	36.657
M14547	36.657
M2389	36.657
M1000	36.657
M18756	36.657
M2638	36.657
M18754	36.657
M18755	36.657
M4106	36.657
M4107	36.657
M6805	36.657
M8437	36.955
M6764	36.955
M11607	36.955
M2071	36.955
M2072	36.955
M19994	36.955
M15379	36.955
M4835	36.955
M4834	36.955
M18949	36.955
M17610	36.955
M14742	36.955
M14743	36.955
M17939	36.955
M18698	36.955
M18699	36.955
M16285	36.955
M16286	36.955
M16284	36.955
M10563	36.955
M10562	36.955
M6022	36.955
M4742	36.955
M888	36.955
M889	36.955
M32633	36.955
M32634	36.955
M19086	36.955
M19087	36.955
M2070	36.955
M10194	36.955
M10193	36.955
M1172	36.955
M3196	36.955
M1384	36.955
M16929	36.955
M14006	36.955
M14005	36.955
M14007	36.955
M14008	36.955
M1467	36.955
M1468	36.955
M14468	36.955
M14469	36.955
M14466	36.955
M14467	36.955
M2113	36.955
M7335	36.955
M1383	36.955
M18849	36.955
M15922	36.955
M15923	36.955
M30455	36.955
M882	36.955
M33058	36.955
M13026	36.955
M13449	36.955
M5191	36.955
M33340	36.955
M18822	36.955
M13478	36.955
M13655	36.955
M8430	36.955
M19007	36.955
M5205	36.955
M12574	36.955
M1005	36.955
M1006	36.955
M9863	36.955
M9409	36.955
M9408	36.955
M9410	36.955
M9864	36.955
M1516	37.55
M1517	37.55
M18600	37.55
M18599	37.55
M13086	40.351
M12688	40.351
M12686	40.351
M12687	40.351
M18502	40.351
M1002	40.648
M1003	40.648
M1518	40.648
M1519	40.648
M1520	40.648
M15027	40.648
M15025	40.648
M15026	40.648
M18000	40.648
M18002	40.648
M18003	40.648
M18001	40.648
M14548	40.648
M14549	40.648
M14550	40.648
M4479	40.648
M4480	40.648
M4478	40.648
M21707	40.648
M21709	40.648
M21708	40.648
M20350	40.648
M20352	40.648
M20351	40.648
M33468	40.648
M33470	40.648
M33469	40.648
M13088	40.648
M13087	40.648
M18503	41.243
M18504	41.243
M884	41.243
M885	41.243
M886	41.541
M887	41.541
M19088	41.541
M19089	42.434
M19090	42.434
M24310	44.578
M22316	44.578
M15481	45.531
M18203	45.531
M18204	45.531
M9943	45.828
M23919	45.828
M17399	45.828
M16483	45.828
M4733	45.828
M2068	45.828
M12339	45.828
M12340	45.828
M5547	45.828
M12777	45.828
M15638	45.828
M15637	45.828
M5246	45.828
M5247	45.828
M16253	45.828
M5813	45.828
M30634	45.828
M24288	45.828
M24289	45.828
M17604	45.828
M17605	45.828
M23772	45.828
M9184	45.828
M9183	45.828
M20038	45.828
M13625	45.828
M13626	45.828
M13623	45.828
M13624	45.828
M20000	45.828
M10840	45.828
M2083	45.828
M2082	45.828
M4719	45.828
M16610	45.828
M10824	45.828
M10826	45.828
M10825	45.828
M8826	45.828
M8827	45.828
M3548	45.828
M3547	45.828
M3549	45.828
M24390	45.828
M11997	45.828
M12876	45.828
M19078	45.828
M19079	45.828
M19077	45.828
M31942	45.828
M2903	45.828
M2902	45.828
M9478	45.828
M22142	45.828
M22141	45.828
M2922	45.828
M12944	45.828
M24326	45.828
M24325	45.828
M3444	45.828
M4838	45.828
M8165	45.828
M9004	45.828
M5742	45.828
M5743	45.828
M17225	45.828
M17226	45.828
M583	45.828
M692	45.828
M9128	45.828
M17443	45.828
M17444	45.828
M5741	45.828
M3497	45.828
M1594	45.828
M1596	45.828
M1598	45.828
M1597	45.828
M1595	45.828
M28938	45.828
M23771	45.828
M19752	46.126
M11598	46.126
M2829	46.126
M2828	46.126
M11599	46.126
M13821	46.424
M13099	46.424
M10838	46.424
M10839	46.424
M4868	46.424
M6713	46.424
M13563	46.424
M13564	46.424
M11552	46.424
M2682	46.424
M33982	46.424
M33981	46.424
M3443	46.424
M3442	46.424
M31736	46.424
M3513	46.424
M24850	46.424
M23890	46.424
M22518	46.424
M22517	46.424
M10578	46.424
M33619	46.424
M33620	46.424
M33400	46.424
M33399	46.721
M11399	46.721
M17886	46.721
M1371	46.721
M7304	46.721
M3095	46.721
M5151	46.721
M31681	46.721
M2357	46.721
M2356	46.721
M9651	46.721
M9652	47.316
M21464	47.316
M22217	47.316
M23795	47.316
M6599	47.316
M6598	47.316
M24077	47.316
M14373	47.316
M14374	47.316
M4035	47.316
M31721	47.316
M9580	47.614
M13850	47.614
M19741	47.614
M4734	47.614
M4732	47.614
M20093	47.614
M20092	47.614
M20091	47.614
M11247	47.614
M338	47.614
M10401	47.614
M1653	47.614
M1493	47.614
M17680	47.614
M33798	47.614
M10946	47.614
M10947	47.614
M17197	47.614
M17198	47.912
M19639	47.912
M82	47.912
M151	48.507
M150	48.507
M13169	48.507
M23503	48.507
M4417	48.507
M4418	48.507
M23290	48.507
M14175	48.507
M15028	48.507
M15029	49.102
M1188	49.102
M15396	49.102
M2378	49.4
M8383	49.4
M8384	49.4
M4959	49.4
M4958	49.4
M23464	49.4
M23463	49.4
M22016	49.4
M10514	49.697
M21556	49.697
M22875	49.995
M22876	49.995
M16677	50.293
M16678	50.293
M59	50.293
M18165	50.293
M18164	50.293
M18719	50.293
M18722	50.293
M18720	50.293
M18721	50.293
M14565	50.293
M14566	50.293
M16268	50.293
M2398	50.293
M2399	50.293
M3778	50.293
M3779	50.293
M12476	50.293
M2691	50.293
M4186	50.293
M20993	50.293
M20994	50.293
M8382	50.293
M1169	50.888
M8386	50.888
M737	50.888
M22	50.888
M18740	50.888
M7305	50.888
M7306	50.888
M13857	50.888
M13460	50.888
M4966	50.888
M19754	51.483
M19753	51.483
M13476	51.483
M13477	51.483
M3645	51.483
M3646	51.483
M34280	51.483
M26697	51.483
M12357	51.483
M10672	53.031
M33402	53.031
M4793	54.282
M4792	54.282
M16689	54.282
M16691	54.282
M16690	54.282
M16687	54.282
M16688	54.282
M14572	54.282
M14573	54.282
M22582	54.282
M10671	54.282
M10670	54.282
M12386	55.175
M12387	55.175
M12388	55.175
M20712	55.175
M20710	55.175
M20711	55.175
M5691	55.175
M5692	55.175
M5693	55.175
M5694	55.175
M14275	55.175
M14276	55.175
M14277	55.175
M14571	55.472
M14574	55.472
M19907	56.365
M19906	56.365
M12355	56.365
M12354	56.365
M12356	56.365
M19779	56.365
M19780	56.365
M19781	56.365
M4790	56.365
M4791	56.365
M12882	57.615
M12883	57.615
M15772	58.211
M15773	58.211
M14180	58.211
M14176	58.211
M8601	58.211
M8602	58.211
M12358	58.508
M1246	58.508
M15775	58.508
M15774	58.508
M10648	59.104
M5992	59.104
M14805	59.401
M14804	59.401
M10647	59.401
M12085	59.699
M17770	59.699
M19679	59.699
M4967	59.699
M27060	59.699
M3604	59.699
M30470	59.699
M27233	59.699
M4844	59.699
M3337	59.699
M14680	59.699
M16941	59.699
M7426	59.699
M21595	59.699
M13424	59.699
M14781	59.699
M13744	59.699
M21214	59.699
M21213	59.699
M3451	59.699
M3452	59.699
M3453	59.699
M23363	59.699
M33267	59.699
M3639	59.699
M3638	59.699
M21611	59.699
M16904	59.699
M4843	59.699
M14200	59.699
M14700	59.699
M14701	59.699
M10746	59.699
M32282	59.699
M6677	59.699
M6676	59.699
M18512	59.699
M1903	59.699
M7040	59.699
M12778	59.699
M20560	59.699
M33675	59.699
M16000	59.699
M11413	59.699
M11746	59.699
M11747	59.996
M21127	59.996
M11430	59.996
M11431	59.996
M5518	59.996
M5517	59.996
M18571	59.996
M10470	59.996
M9293	59.996
M23921	59.996
M33875	59.996
M24367	59.996
M12431	59.996
M4027	59.996
M4026	59.996
M17010	59.996
M17008	59.996
M8895	59.996
M11698	59.996
M391	59.996
M12086	59.996
M12087	59.996
M11020	59.996
M30479	59.996
M585	59.996
M17588	59.996
M6509	59.996
M6507	59.996
M6508	59.996
M28397	59.996
M17587	59.996
M13203	59.996
M13204	59.996
M21671	59.996
M1920	59.996
M18885	59.996
M3316	59.996
M20593	60.592
M9988	60.592
M6191	60.592
M19053	60.592
M4917	60.592
M4916	60.592
M3598	60.592
M16892	60.592
M19794	60.592
M19793	60.592
M5817	60.592
M5217	60.592
M14512	60.889
M12248	60.889
M22171	60.889
M11170	60.889
M11169	60.889
M1904	60.889
M1905	60.889
M1906	60.889
M1233	60.889
M1237	61.187
M1235	61.187
M9371	61.187
M9370	61.187
M19456	61.187
M19454	61.187
M19455	61.187
M20373	61.187
M832	61.187
M833	61.187
M23422	61.485
M1173	61.485
M1171	61.485
M3775	61.782
M11403	61.782
M11404	61.782
M24588	61.782
M24589	62.08
M24590	62.08
M8238	62.08
M5152	62.08
M5153	62.08
M5154	62.08
M24167	62.08
M22092	62.377
M13800	62.377
M13799	62.377
M6442	62.377
M6443	62.377
M6444	62.377
M8205	62.377
M8603	62.377
M2923	62.377
M2924	62.377
M1658	62.377
M13959	62.377
M33454	62.377
M23494	62.377
M33541	62.377
M33540	62.377
M2348	62.377
M24323	62.377
M24321	62.377
M24322	62.377
M14709	62.377
M16454	62.377
M31075	62.377
M5976	62.377
M21089	62.675
M21090	62.675
M10012	62.675
M33977	62.675
M24976	62.675
M18100	62.675
M10622	62.675
M16016	62.675
M920	62.675
M12620	62.675
M31871	62.675
M1251	62.675
M2995	62.675
M15742	62.675
M15743	62.675
M15741	62.675
M5392	62.675
M19119	62.675
M5630	62.675
M5629	62.675
M3438	62.675
M47	62.675
M19890	62.675
M4591	62.675
M23018	62.675
M23355	62.675
M33736	62.675
M33737	62.675
M5962	62.675
M10646	62.675
M3966	62.675
M18844	62.675
M11804	62.675
M11695	62.675
M11696	62.675
M13135	62.675
M10063	62.675
M713	62.675
M20016	62.675
M20018	62.675
M15587	62.675
M15588	62.675
M30415	62.675
M30416	62.675
M34032	62.675
M21200	62.675
M3574	62.973
M3575	62.973
M316	62.973
M317	62.973
M33007	62.973
M14634	62.973
M21201	62.973
M20964	62.973
M30275	62.973
M30274	62.973
M17327	62.973
M4583	62.973
M4584	62.973
M1328	63.27
M23573	63.27
M23574	63.27
M23575	63.27
M8510	63.27
M22037	63.27
M22038	63.27
M22036	63.27
M923	63.27
M924	63.27
M925	63.27
M26350	63.27
M34287	63.27
M34288	63.27
M24282	63.27
M23636	63.27
M4274	63.27
M22945	63.27
M3791	63.27
M25148	63.27
M25747	63.27
M21362	63.27
M11828	63.27
M3439	63.27
M13479	63.27
M21294	63.27
M12143	63.27
M4942	63.27
M19988	63.27
M17933	63.27
M20751	63.27
M20750	63.27
M19151	63.27
M20931	63.27
M20932	63.27
M33890	63.27
M33889	63.27
M23151	63.27
M2442	63.27
M10791	63.27
M10790	63.27
M24256	63.27
M19401	63.27
M19400	63.27
M11901	63.568
M4410	63.568
M4409	63.568
M4411	63.568
M6300	63.568
M16334	63.568
M18729	63.568
M7383	63.568
M10523	63.568
M19942	63.568
M19943	63.568
M13222	63.568
M33043	63.568
M33044	63.568
M3676	63.568
M3677	63.568
M3678	63.568
M9904	63.568
M22912	63.568
M28497	63.568
M28498	63.568
M16267	63.568
M17679	63.568
M17678	63.568
M1782	63.568
M8715	63.568
M54	63.568
M2021	63.568
M14852	63.568
M3381	63.568
M20918	63.568
M21650	63.568
M6013	63.568
M6014	63.568
M21488	63.568
M12459	63.568
M17275	63.568
M16046	63.568
M16045	63.568
M18581	63.568
M18582	63.568
M3603	63.568
M3602	63.568
M31488	63.568
M9255	63.568
M16393	63.568
M11382	63.568
M11022	63.568
M11021	63.568
M4831	63.568
M4832	63.568
M17268	63.568
M17121	63.568
M4881	63.568
M13878	63.568
M4971	63.568
M7177	63.568
M14736	63.568
M14737	63.568
M18693	63.568
M31505	63.568
M20920	63.568
M23579	63.568
M5781	63.568
M22505	63.568
M21577	63.568
M20420	63.568
M20421	63.568
M20516	63.568
M7617	63.568
M721	63.568
M498	63.568
M6090	63.568
M9543	63.568
M4183	63.568
M16993	63.568
M4795	63.568
M7269	63.568
M7105	63.568
M17716	63.568
M7093	63.568
M1549	63.568
M1550	63.568
M1548	63.568
M31202	63.568
M5299	63.568
M15948	63.568
M15949	63.568
M15950	63.568
M15951	63.568
M7286	63.568
M7287	63.568
M15868	63.568
M3851	63.568
M3852	63.568
M11657	63.568
M11656	63.568
M4753	63.568
M15298	63.568
M9344	63.568
M12257	64.163
M12258	64.163
M22184	64.163
M6235	64.163
M22245	64.163
M23521	64.163
M8892	64.163
M20524	64.163
M17691	64.163
M8360	64.163
M8361	64.163
M4028	64.163
M22465	64.163
M281	64.163
M4147	64.163
M23664	64.163
M23663	64.163
M25175	64.163
M25102	64.163
M16308	64.163
M33900	64.163
M33899	64.163
M7952	64.163
M30701	64.163
M30702	64.163
M5859	64.163
M603	64.163
M34012	64.163
M34674	64.163
M34675	64.163
M19751	64.163
M22653	64.163
M22654	64.163
M34583	64.163
M21555	64.163
M23343	64.163
M19655	64.163
M322	64.163
M13052	64.163
M20806	64.163
M32263	64.163
M32262	64.163
M20807	64.163
M20076	64.163
M9345	64.461
M8855	64.461
M17238	64.461
M5881	64.461
M11478	64.461
M10768	64.461
M10767	64.461
M21706	64.461
M17514	64.461
M3606	64.461
M26931	64.461
M26930	64.461
M881	64.461
M23408	64.461
M24512	64.461
M24511	64.461
M16629	64.461
M16628	64.461
M9417	64.461
M16157	64.461
M17045	64.461
M3360	64.461
M15959	64.461
M9471	64.461
M20933	64.461
M2894	64.461
M12951	64.461
M12950	64.461
M32568	64.461
M921	64.461
M6614	64.461
M6615	64.461
M20347	64.461
M9772	64.461
M30475	64.461
M12321	64.461
M11389	64.461
M16349	64.461
M16348	64.461
M16347	64.461
M17047	64.461
M21746	64.461
M21747	64.461
M13991	64.461
M13992	64.461
M34053	64.461
M21482	64.461
M13419	64.461
M12433	64.461
M12434	64.461
M11900	64.461
M3292	64.461
M3293	64.461
M2204	64.461
M7406	64.461
M7405	64.461
M7178	64.461
M7179	64.461
M10866	64.461
M10867	64.461
M9304	64.461
M12897	64.461
M12896	64.461
M4356	64.461
M3619	64.461
M9292	64.461
M4664	64.461
M21672	64.461
M13617	64.461
M16160	64.461
M16161	64.461
M2194	64.461
M8358	64.461
M20845	64.461
M20846	64.461
M20847	64.461
M13607	64.461
M13606	64.461
M18842	64.461
M10025	64.461
M10026	64.461
M10389	64.461
M19028	64.461
M6901	64.461
M6902	64.461
M6903	64.461
M1531	64.461
M3199	64.461
M3198	64.461
M3790	64.461
M4987	64.461
M13083	64.461
M6465	64.461
M6575	64.461
M9989	64.461
M20075	64.461
M5422	64.461
M16664	64.461
M16663	64.461
M26026	64.461
M13003	64.461
M363	64.461
M15330	64.461
M7103	64.461
M7104	64.461
M15329	64.461
M2976	64.461
M2977	64.461
M20730	64.461
M20731	64.461
M10383	64.461
M13367	64.461
M18087	64.461
M7590	64.461
M1088	64.461
M1089	64.461
M7589	64.461
M5133	64.461
M15306	64.461
M15305	64.461
M5780	64.461
M11633	64.461
M3326	64.461
M1993	64.461
M277	64.461
M278	64.461
M276	64.461
M273	64.461
M274	64.461
M275	64.461
M272	64.461
M9967	64.461
M6872	64.461
M6873	64.461
M20457	64.461
M13824	64.461
M21586	64.461
M16194	64.461
M16226	64.461
M16227	64.461
M18109	64.461
M18110	64.461
M14570	64.461
M473	64.461
M3134	64.461
M16509	64.461
M16510	64.461
M25352	64.461
M25353	64.461
M8896	64.461
M9065	64.461
M9873	64.461
M8414	64.461
M9486	64.461
M27763	64.461
M3033	64.461
M4577	64.461
M4578	64.461
M32933	64.461
M10731	64.461
M32113	64.461
M6721	64.461
M6722	64.461
M4077	64.461
M6346	64.461
M6400	64.461
M6401	64.461
M6402	64.461
M975	64.461
M18837	64.461
M18838	64.461
M4913	64.461
M7169	64.461
M7170	64.461
M3819	64.461
M3820	64.461
M775	64.461
M14834	64.461
M14835	64.461
M6688	64.461
M6689	64.461
M12199	64.461
M11667	64.461
M32674	64.461
M20146	64.461
M20147	64.461
M9536	64.461
M9535	64.461
M53	64.461
M16430	64.461
M16429	64.461
M4811	64.461
M2452	64.461
M13129	64.461
M6958	64.461
M10499	64.461
M10500	64.461
M10501	64.461
M16162	64.461
M31806	64.461
M329	64.461
M32520	64.461
M8332	64.461
M17907	64.758
M22506	64.758
M24193	64.758
M13121	64.758
M32521	64.758
M8884	64.758
M8885	64.758
M13450	64.758
M14271	64.758
M14162	64.758
M13550	64.758
M13549	64.758
M1272	64.758
M1271	64.758
M32765	64.758
M32766	64.758
M20773	64.758
M7552	64.758
M21819	64.758
M21818	64.758
M14043	64.758
M10183	64.758
M10182	64.758
M33624	64.758
M14587	64.758
M14588	64.758
M5812	64.758
M5572	64.758
M22964	64.758
M22965	64.758
M5556	64.758
M5557	64.758
M31385	64.758
M31500	64.758
M26575	64.758
M9093	64.758
M23238	64.758
M23237	64.758
M23239	64.758
M3720	64.758
M34275	64.758
M22305	64.758
M23014	64.758
M31197	64.758
M31198	64.758
M31199	64.758
M29504	64.758
M26691	64.758
M30562	64.758
M28848	65.056
M28849	65.056
M29715	65.056
M29716	65.056
M22154	65.056
M22155	65.056
M22156	65.056
M22153	65.056
M22152	65.056
M24890	65.056
M7903	65.056
M30203	65.056
M30202	65.056
M33526	65.056
M33527	65.056
M34076	65.056
M34077	65.056
M1141	65.056
M1142	65.056
M30929	65.056
M31651	65.056
M23013	65.056
M34244	65.056
M8520	65.354
M4021	65.354
M20716	65.354
M20717	65.354
M16930	65.354
M16931	65.354
M11593	65.354
M11592	65.354
M1346	65.354
M22501	65.354
M22500	65.354
M12028	65.651
M6386	65.651
M748	65.651
M749	65.651
M5121	65.651
M8235	65.651
M8236	65.651
M468	65.651
M7108	65.651
M16423	65.651
M16424	65.651
M22342	65.651
M22343	65.651
M515	65.651
M22874	65.651
M22873	65.651
M18788	65.651
M3949	65.651
M3951	65.651
M3950	65.651
M3948	65.651
M14949	65.651
M14950	65.651
M14948	65.651
M3468	65.651
M3466	65.651
M3467	65.651
M3469	65.651
M20355	65.651
M33746	65.651
M22199	65.651
M22200	65.651
M22202	65.651
M22201	65.651
M12805	65.651
M12806	65.651
M12803	65.651
M12804	65.651
M33448	65.651
M22430	65.651
M12869	65.651
M15283	65.651
M8126	65.651
M5366	65.651
M4576	65.651
M27144	65.651
M17571	65.651
M7557	65.651
M14378	65.651
M14379	65.651
M854	65.651
M20901	65.651
M922	65.651
M19572	65.651
M31459	65.651
M13388	65.651
M13389	65.651
M13390	65.651
M13391	65.651
M13386	65.651
M13387	65.651
M12958	65.651
M18224	65.651
M16590	65.651
M16591	65.651
M13183	66.247
M13184	66.247
M1344	66.247
M1345	66.247
M15078	66.247
M32500	66.247
M32499	66.247
M7718	66.247
M7720	66.247
M7721	66.247
M7719	66.247
M10180	66.247
M10181	66.247
M10179	66.247
M19442	66.247
M19441	66.247
M19443	66.247
M14294	66.842
M12109	66.842
M12110	67.139
M20437	67.139
M23451	67.139
M23839	67.735
M16815	67.735
M13509	68.756
M33120	68.756
M16817	70.304
M16816	70.304
M9029	70.899
M9028	70.899
M9027	70.899
M7132	70.899
M7130	70.899
M7131	70.899
M19462	71.197
M19463	71.197
M19464	71.197
M14677	71.197
M14679	71.197
M14678	71.197
M12853	72.447
M12854	72.447
M12855	72.447
M16995	72.447
M16996	72.447
M16994	72.447
M7166	72.447
M7167	72.447
M7168	72.447
M16773	72.447
M16774	72.447
M16775	72.447
M16776	72.447
M14832	72.447
M14831	72.447
M14833	72.447
M17056	72.447
M17057	72.447
M17058	72.447
M17059	72.447
M17507	72.447
M17509	72.447
M17508	72.447
M14739	72.745
M14740	72.745
M14738	72.745
M21596	72.745
M13486	72.745
M1077	72.745
M16626	72.745
M16627	73.34
M16625	73.34
M22216	73.638
M13011	73.638
M13012	73.638
M13013	73.638
M20823	73.638
M20820	73.638
M20821	73.638
M20822	73.638
M12196	73.638
M12198	73.638
M12197	73.638
M13618	73.638
M13619	73.638
M13620	73.935
M21597	73.935
M21598	74.242
M4217	74.242
M4216	74.242
M13487	74.242
M32501	74.242
M32502	74.242
M27297	74.54
M27296	74.54
M27298	74.54
M20621	74.54
M29545	74.837
M3171	74.837
M3172	74.837
M3173	74.837
M8522	75.135
M8524	75.135
M1253	75.135
M1254	75.135
M1252	75.135
M7592	75.135
M7593	75.73
M7591	75.73
M8521	75.73
M8523	75.73
M2527	77.278
M2524	77.278
M2525	77.576
M2526	77.576
M11150	77.576
M11151	77.576
M11152	77.576
M23274	77.576
M23273	77.883
M23272	77.883
M3074	78.18
M3076	78.18
M3075	78.18
M17717	78.18
M17718	78.18
M17719	78.18
M17720	78.18
M21490	78.18
M21489	78.18
M21491	78.18
M4402	78.18
M4403	78.18
M4404	78.18
M4405	78.18
M30399	78.18
M30400	78.18
M30401	78.18
M30578	78.776
M1343	78.776
M30581	78.776
M10467	78.776
M10465	78.776
M10466	78.776
M3870	78.776
M3866	78.776
M3868	78.776
M3867	78.776
M3869	78.776
M18211	79.073
M18210	79.073
M18212	79.073
M19157	79.073
M19158	79.073
M10774	79.073
M10773	79.073
M10772	79.073
M6631	79.073
M6632	79.073
M6633	79.073
M20176	79.073
M20174	79.073
M20175	79.073
M18544	79.073
M18543	79.073
M18545	79.073
M11051	79.073
M11052	79.073
M11053	79.073
M33781	80.621
M33784	80.621
M33782	80.621
M33783	80.621
M8150	81.217
M26349	81.217
M26348	81.217
M26347	81.217
M26346	81.812
M27139	81.812
M27141	81.812
M27140	81.812
M28019	83.062
M28020	83.062
M15509	83.36
M15510	83.36
M15511	83.657
M20422	83.657
M20238	84.253
M20240	84.253
M20239	84.253
M1049	84.253
M1052	84.253
M1050	84.253
M1051	84.253
M12507	84.253
M12508	84.253
M12509	84.253
M26084	84.253
M26083	84.253
M26085	85.146
M26082	85.146
M2680	85.443
M2681	85.443
M2676	85.443
M2677	85.443
M2678	85.443
M2679	85.443
M20370	85.443
M20371	85.443
M20372	85.443
M16229	85.741
M16231	85.741
M16230	85.741
M7466	85.741
M7467	85.741
M7468	85.741
M12723	86.038
M12724	86.038
M12725	86.038
M9732	86.038
M9733	86.038
M9734	86.038
M644	86.038
M645	86.038
M646	86.038
M647	86.038
M13719	89.496
M13721	89.496
M13720	89.496
M15348	89.496
M15349	89.496
M15350	90.092
M15347	90.092
M26235	92.931
M26234	92.931
M30821	94.181
M30817	94.181
M30818	94.181
M11865	94.181
M11869	94.777
M10653	94.777
M10649	94.777
M27870	95.372
M27867	95.372
M28845	95.372
M27653	95.669
M29425	95.669
M28272	95.669
M29933	95.669
M29928	95.669
M26108	95.669
M26106	95.669
M30097	95.669
M8247	95.669
M8248	95.669
M18134	95.669
M18133	95.967
M29149	95.967
M29147	95.967
M13855	95.967
M13852	95.967
M7909	96.562
M2013	96.562
M2015	96.562
M2012	97.158
M30261	97.158
M26898	97.455
M26899	97.455
M26900	98.05
M32951	98.05
M27717	100.553
M26566	100.553
M26568	102.229
M33143	102.229
M2364	102.229
M14400	102.229
M14401	104.075
M14402	104.075
M24225	104.67
M24226	104.67
M24227	104.67
M5261	104.67
M5260	104.67
M5262	104.67
M7301	104.67
M7302	104.67
M7300	104.67
M7303	104.67
M3262	104.67
M3263	104.67
M3264	104.67
M3265	104.67
M21408	104.67
M14247	105.266
M15734	105.266
M20623	105.861
M20622	105.861
M5586	105.861
M29391	106.754
M3553	106.754
M3551	106.754
M3552	106.754
M3554	106.754
M6932	106.754
M6933	106.754
M6931	106.754
M5587	107.349
M5588	107.349
M15098	107.349
M15096	107.349
M15097	107.349
M6251	107.349
M6250	107.349
M6252	107.349
M3272	107.349
M3274	107.349
M3273	107.349
M12640	107.349
M12641	107.349
M353	107.349
M354	107.349
M355	107.349
M17533	107.349
M17534	107.349
M17536	107.349
M17535	107.349
M29390	107.349
M29389	107.349
M15736	107.944
M15735	107.944
M20620	107.944
M21409	108.54
M21410	108.54
M698	108.54
M699	108.54
M700	108.54
M12642	108.54
M14246	108.54
M14248	108.54
M8052	111.111
M29995	111.111
M13438	112.659
M19239	112.659
M19240	112.659
M15512	112.659
M15513	112.659
M5471	112.659
M5470	112.659
M507	112.659
M508	112.659
M21744	112.659
M20813	112.659
M20814	112.659
M12888	112.659
M23563	112.956
M1501	112.956
M1502	112.956
M1503	112.956
M1325	112.956
M15394	112.956
M252	113.254
M19433	113.254
M2952	113.552
M28488	113.552
M28486	113.552
M5438	113.552
M8328	113.552
M8330	113.552
M16082	113.552
M16081	113.552
M8160	113.552
M7253	113.552
M7254	113.552
M3087	113.552
M13848	113.552
M13849	113.552
M22603	113.849
M7268	113.849
M9308	113.849
M9307	113.849
M17651	113.849
M1723	113.849
M19547	113.849
M6175	113.849
M6176	113.849
M7722	113.849
M1145	113.849
M4845	113.849
M4534	113.849
M4535	113.849
M18126	113.849
M16361	113.849
M6917	113.849
M6918	113.849
M33349	113.849
M33348	113.849
M33347	113.849
M21660	113.849
M20040	113.849
M2730	113.849
M18655	113.849
M14449	113.849
M8049	113.849
M21797	113.849
M11243	113.849
M11244	113.849
M8161	113.849
M8162	113.849
M8163	113.849
M19432	113.849
M2069	113.849
M1303	113.849
M504	113.849
M7653	113.849
M30287	113.849
M20237	113.849
M21784	113.849
M5884	113.849
M18302	113.849
M18736	113.849
M12722	113.849
M9439	113.849
M16942	113.849
M16943	113.849
M15627	113.849
M17448	113.849
M15354	113.849
M11706	113.849
M21455	113.849
M14438	114.147
M14439	114.147
M16518	114.147
M16519	114.147
M10013	114.147
M6253	114.147
M18122	114.147
M18123	114.147
M10558	114.147
M22661	114.147
M23207	114.147
M1954	114.147
M20810	114.147
M12776	114.147
M15492	114.147
M637	114.147
M5232	114.147
M12451	114.147
M8329	114.147
M9735	114.147
M1108	114.147
M1109	114.147
M10198	114.147
M5871	114.147
M5872	114.147
M7149	114.147
M643	114.147
M8665	114.147
M8666	114.147
M8667	114.147
M372	114.147
M12018	114.147
M12638	114.147
M12639	114.147
M9993	114.147
M9994	114.147
M22375	114.147
M18506	114.147
M6934	114.147
M6935	114.147
M418	114.147
M419	114.147
M10042	114.147
M11124	114.147
M3329	114.147
M3328	114.147
M6403	114.147
M18124	114.147
M15818	114.147
M1415	114.147
M14905	114.147
M17929	114.147
M5873	114.147
M4063	114.147
M4064	114.147
M4062	114.147
M20231	114.147
M20616	114.147
M5120	114.147
M32783	114.147
M26895	114.742
M3098	114.742
M21341	114.742
M21342	114.742
M5038	114.742
M5037	114.742
M17250	114.742
M17251	114.742
M4929	114.742
M16803	114.742
M13592	114.742
M16228	114.742
M25250	114.742
M25249	114.742
M17249	114.742
M4303	114.742
M4304	114.742
M4305	114.742
M4306	114.742
M308	114.742
M309	114.742
M10669	114.742
M19680	114.742
M7784	114.742
M11153	114.742
M11154	114.742
M20559	115.695
M18446	115.695
M27158	115.695
M4797	115.695
M4796	115.695
M33235	115.695
M33236	115.695
M27450	115.695
M4044	115.695
M13713	115.695
M13714	115.695
M4457	115.695
M21786	115.695
M8381	115.695
M1794	115.695
M1795	115.695
M19737	115.695
M20274	115.695
M20275	115.695
M14664	115.695
M14665	115.695
M15725	115.695
M15726	115.695
M18752	115.695
M21407	115.695
M4428	115.695
M9088	115.695
M24873	115.695
M19498	115.695
M19497	115.695
M11373	115.695
M13158	115.695
M13159	115.695
M21662	115.695
M501	115.695
M17892	115.695
M2503	115.695
M32487	115.695
M6244	115.695
M6245	115.695
M2669	115.695
M7425	115.695
M12067	115.695
M499	115.695
M500	115.695
M1652	115.695
M1651	115.695
M613	115.695
M17637	115.695
M6554	115.695
M6555	115.695
M12058	115.695
M12059	115.695
M11390	115.695
M3271	115.695
M18072	115.695
M13715	115.695
M2363	115.695
M843	115.695
M3680	115.695
M3681	115.695
M14312	115.695
M33598	115.695
M33599	116.29
M31052	116.29
M469	116.587
M470	116.587
M29128	116.587
M29127	116.587
M29126	116.587
M5056	116.587
M5671	116.587
M22039	116.587
M11374	116.587
M11375	116.587
M3653	116.587
M834	116.587
M18389	117.838
M18390	117.838
M21630	117.838
M1030	118.79
M15566	118.79
M32145	118.79
M32144	118.79
M29023	118.79
M29024	119.088
M9447	119.088
M22946	119.088
M22096	119.088
M23920	119.088
M11360	119.088
M19106	119.088
M9131	119.088
M4022	119.385
M34243	119.385
M14523	119.385
M21263	119.385
M13042	119.385
M20166	119.385
M20167	119.385
M2299	119.385
M10513	119.385
M26006	119.385
M26007	119.385
M13946	119.385
M5215	119.385
M5216	119.385
M14747	119.385
M14746	119.385
M26182	119.385
M2646	119.385
M2647	119.385
M18332	119.385
M12131	119.385
M12132	119.385
M18703	119.981
M19156	119.981
M1135	120.278
M883	120.278
M6243	120.278
M10433	120.278
M10434	120.278
M12530	120.278
M16862	120.278
M18731	120.278
M18732	120.278
M4566	120.278
M9090	120.278
M9089	120.278
M18553	120.278
M14443	120.278
M1021	120.278
M14872	120.278
M13518	120.278
M9783	120.278
M15599	120.278
M6878	120.278
M6879	120.278
M10395	120.278
M10394	120.278
M13357	120.576
M14620	120.576
M1998	120.576
M15866	120.576
M15780	120.576
M15781	120.576
M15778	120.576
M15779	120.576
M12019	120.576
M9583	120.576
M8932	120.576
M9118	120.576
M8320	120.576
M1279	120.576
M1278	120.576
M26645	120.576
M26700	120.576
M26699	120.576
M26698	120.576
M26518	120.576
M21836	120.576
M2523	120.576
M2522	120.576
M3077	120.576
M3078	120.576
M7465	120.576
M7464	120.576
M15141	120.576
M16701	120.576
M13538	120.576
M4784	120.576
M13152	120.576
M16567	120.576
M17688	120.576
M32038	120.576
M17687	120.576
M17816	120.576
M17817	120.576
M17818	120.576
M16916	120.576
M16917	120.576
M16642	120.576
M16643	120.576
M16864	120.576
M16865	120.576
M13233	120.576
M18170	120.576
M11219	120.576
M11218	120.576
M11217	120.576
M1011	120.576
M8690	120.576
M14655	120.576
M19434	120.576
M14658	120.576
M4261	120.576
M4262	120.576
M9817	120.576
M4197	120.576
M10464	120.576
M10463	120.576
M4198	120.576
M3918	120.576
M2613	120.576
M7011	120.576
M7012	120.576
M18301	120.576
M2232	120.576
M16728	120.576
M9802	120.576
M9803	120.576
M10382	120.576
M10379	120.576
M10380	120.576
M10381	120.576
M30690	120.576
M30691	120.576
M5943	120.576
M15036	120.576
M3032	120.576
[truncated: 182 more rows]

## Sheet: LG4
SNP code in LG4	Genetic distance（cM）
M999	0
M29760	0
M29761	0
M29762	0
M26938	0
M26940	0
M26937	0
M8672	0
M8676	0.723
M8675	0.723
M8673	0.723
M8674	0.723
M28993	1.318
M28994	1.318
M28169	1.318
M28172	1.318
M28171	1.318
M12780	4.477
M12781	4.477
M12782	4.477
M18879	5.43
M5654	5.43
M18067	5.43
M18068	5.43
M9301	5.43
M10610	5.43
M19826	5.43
M19827	5.43
M24214	5.43
M24213	5.43
M3964	5.43
M13247	5.43
M22647	5.43
M22646	5.43
M6107	5.43
M5134	5.43
M7456	5.43
M7457	5.43
M5135	5.43
M16909	5.43
M10410	6.025
M21149	6.025
M2172	6.025
M13785	6.323
M13784	6.323
M18974	6.323
M18975	6.323
M18972	6.323
M18973	6.323
M21857	6.62
M25527	6.62
M12702	7.215
M34	7.215
M398	7.215
M1734	8.466
M19877	8.466
M19878	8.466
M17776	8.763
M9030	8.763
M18943	8.763
M6692	8.763
M6690	9.061
M6691	9.061
M10608	10.967
M10609	10.967
M17338	12.872
M17339	12.872
M1676	12.872
M1586	12.872
M1587	12.872
M9894	12.872
M14062	12.872
M21051	13.825
M18843	13.825
M16028	13.825
M4060	13.825
M32347	13.825
M4276	13.825
M4275	13.825
M15898	13.825
M11947	13.825
M9149	14.122
M6580	14.122
M6579	14.42
M18153	14.42
M8590	14.42
M17667	14.42
M20478	14.42
M7690	14.42
M7691	14.42
M7692	15.373
M7693	15.373
M8134	16.921
M23707	16.921
M23706	16.921
M24147	18.469
M2108	18.469
M9254	19.719
M14212	19.719
M17803	20.314
M15257	20.314
M1122	20.612
M18386	20.612
M11961	21.207
M7675	21.207
M7676	21.207
M18845	22.16
M12294	22.16
M12295	23.41
M8616	23.41
M5798	23.708
M5797	23.708
M13168	23.708
M3559	23.708
M1347	23.708
M7313	23.708
M7314	23.708
M16852	23.708
M2945	23.708
M32137	23.708
M32136	24.303
M18455	24.303
M20483	24.601
M6948	24.601
M13876	24.601
M13877	24.601
M1208	25.553
M6663	25.553
M21271	26.506
M15322	26.506
M15323	26.803
M18952	26.803
M18951	29.007
M18953	29.007
M19901	29.007
M4688	29.602
M20921	29.602
M4465	29.602
M5023	29.602
M5022	29.602
M4137	29.602
M4138	29.602
M2726	29.602
M2727	29.602
M913	29.602
M914	29.602
M915	29.602
M19997	29.602
M19996	29.602
M11099	29.602
M23529	29.602
M23530	29.602
M3498	29.602
M3499	30.197
M3500	30.197
M1846	30.197
M11166	30.197
M11167	30.197
M11165	30.197
M1956	30.197
M6701	30.495
M19230	30.495
M10461	30.495
M14730	30.793
M4151	30.793
M4152	30.793
M30313	30.793
M30314	30.793
M29950	30.793
M29952	30.793
M29951	30.793
M10808	30.793
M10809	31.09
M27772	31.09
M27771	31.09
M27773	31.09
M3817	31.09
M1824	31.09
M10349	31.09
M15673	31.09
M11069	31.09
M12051	31.388
M11067	31.388
M11066	31.388
M11065	31.388
M11068	31.388
M11335	31.686
M505	31.686
M506	31.686
M10287	31.686
M21348	31.686
M4621	31.686
M2296	31.686
M32932	31.686
M60	31.686
M892	31.686
M12534	31.686
M8908	31.983
M8907	31.983
M17826	31.983
M3089	31.983
M18747	31.983
M18746	31.983
M20514	32.281
M20515	32.281
M20579	32.281
M6756	32.281
M13811	32.281
M6757	33.233
M6758	33.233
M11126	33.829
M17097	33.829
M17828	34.126
M16191	34.126
M15366	34.721
M19911	34.721
M16059	34.721
M29358	34.721
M29357	34.721
M29359	34.721
M31745	34.721
M29612	34.721
M29611	34.721
M29613	34.721
M5542	34.721
M19249	34.721
M17812	34.721
M11332	34.721
M11331	34.721
M14918	34.721
M26603	35.019
M26602	35.019
M17497	35.019
M17498	35.019
M14463	35.972
M29579	35.972
M29578	36.567
M10190	36.567
M21553	36.567
M21552	36.567
M13173	37.817
M8925	37.817
M14758	38.115
M14759	38.115
M19248	38.115
M15952	38.71
M2791	38.71
M3959	38.71
M19178	38.71
M17777	38.71
M6871	38.71
M12875	38.71
M9790	38.71
M9789	38.71
M6209	38.71
M6210	39.008
M12874	39.008
M3916	39.008
M1055	39.305
M22884	39.305
M18358	39.305
M18359	39.305
M18356	39.901
M18357	39.901
M19696	39.901
M6620	39.901
M16141	39.901
M9791	39.901
M2340	39.901
M13987	39.901
M30338	39.901
M21022	39.901
M21021	39.901
M1966	39.901
M13115	39.901
M29875	39.901
M29876	39.901
M29877	39.901
M14027	39.901
M14028	40.198
M14029	40.198
M31904	40.198
M7117	40.496
M3799	40.496
M22537	40.793
M22538	40.793
M701	41.091
M5155	41.091
M20595	41.389
M18584	41.389
M19056	41.686
M3257	41.686
M2804	41.686
M2803	41.686
M13838	41.686
M16343	41.686
M15993	41.984
M3800	41.984
M29352	42.282
M1836	42.282
M22435	42.282
M21898	42.579
M899	42.579
M6273	42.579
M6274	42.579
M23721	42.877
M23722	42.877
M26255	42.877
M26257	42.877
M26256	42.877
M27861	42.877
M27860	42.877
M27862	42.877
M26251	42.877
M26253	42.877
M26252	42.877
M26254	42.877
M3157	42.877
M6230	42.877
M6616	42.877
M23445	43.472
M31443	43.472
M23596	43.472
M34247	43.472
M11370	43.472
M17764	43.472
M17765	43.472
M1940	43.472
M1939	43.472
M4116	43.77
M9411	43.77
M14111	43.77
M2837	43.77
M5061	43.77
M20189	43.77
M2110	43.77
M12975	43.77
M12974	43.77
M21612	43.77
M5364	43.77
M2226	43.77
M17429	44.067
M1317	44.067
M20780	44.067
M14755	44.067
M14757	44.067
M14756	44.067
M14231	44.067
M11538	44.663
M11537	44.663
M27571	44.663
M27573	45.258
M27572	45.258
M13707	46.806
M13708	46.806
M13706	46.806
M10313	47.699
M10314	47.699
M8777	50.927
M11267	50.927
M13866	56.064
M26550	56.064
M26551	57.314
M21729	57.314
M17647	57.314
M16017	57.612
M6809	57.612
M3898	57.909
M10971	57.909
M918	57.909
M919	57.909
M13552	57.909
M17971	57.909
M7944	57.909
M31891	58.207
M20033	58.207
M8996	58.505
M12188	58.505
M15011	58.505
M26130	58.505
M17675	58.505
M17674	58.505
M18129	58.505
M18128	58.505
M4482	59.457
M230	59.457
M4602	59.457
M26849	59.457
M26848	59.755
M4329	59.755
M29911	60.052
M29912	60.052
M13583	60.052
M13582	60.052
M33082	60.052
M33083	60.052
M27502	60.052
M26075	60.052
M26074	60.052
M17248	60.052
M6493	60.052
M15783	60.052
M5973	60.052
M20570	60.052
M20787	60.052
M20788	60.052
M11566	60.052
M13313	60.052
M13501	60.052
M9715	60.052
M9714	60.052
M21479	60.052
M21480	60.052
M438	60.052
M15215	60.052
M4101	60.052
M16390	60.052
M16391	60.052
M31485	60.052
M31484	60.052
M15077	60.052
M32985	60.052
M10210	60.052
M27469	60.052
M27470	60.052
M7716	60.052
M29146	60.052
M13271	60.052
M30347	60.052
M30348	60.052
M32092	60.052
M32093	60.052
M19340	60.052
M33010	60.052
M10913	60.052
M15976	60.052
M3640	60.052
M17553	60.052
M18414	60.052
M9953	60.052
M6984	60.35
M6510	60.35
M20902	60.35
M16065	60.35
M6505	60.35
M6504	60.35
M2189	60.35
M12007	60.35
M12008	60.35
M23553	60.35
M23552	60.35
M21783	60.35
M4696	60.35
M4697	60.35
M21661	60.35
M10373	60.35
M10374	60.35
M32495	60.35
M32494	60.35
M377	60.35
M376	60.35
M10810	60.35
M2842	60.35
M2841	60.35
M10787	60.35
M10786	60.35
M10788	60.35
M10789	60.35
M23950	60.35
M8171	60.35
M18031	60.35
M12826	60.35
M20523	60.35
M20522	60.35
M26093	60.35
M26094	60.35
M26095	60.35
M4670	60.35
M12824	60.35
M12825	60.35
M37	60.35
M38	60.35
M16035	60.35
M16034	60.35
M16233	60.35
M2237	60.35
M33006	60.35
M3539	60.35
M30351	60.35
M30352	60.35
M3458	60.35
M3459	60.35
M12040	60.35
M12041	60.35
M11912	60.35
M11913	60.35
M4355	60.35
M11774	60.35
M11775	60.35
M19773	60.35
M26644	60.35
M29654	60.35
M9952	60.35
M9954	60.35
M10479	60.35
M9713	60.35
M2789	60.35
M22211	60.35
M22210	60.35
M1265	60.35
M17383	60.35
M766	60.35
M32000	60.35
M13964	60.35
M33276	60.35
M33277	60.35
M33274	60.35
M33275	60.35
M4915	60.35
M15439	60.35
M33403	60.35
M11010	60.35
M10751	60.648
M14447	60.648
M13143	60.648
M13144	60.648
M11638	60.648
M14039	60.648
M85	60.648
M23528	60.648
M13924	60.648
M17737	60.648
M20926	60.648
M20925	60.648
M2303	60.648
M16551	60.648
M16549	60.648
M16550	60.648
M10315	60.648
M17437	60.648
M21953	60.648
M21954	60.648
M21955	60.648
M24170	60.648
M24505	60.648
M24506	60.648
M24457	60.648
M14873	60.648
M18315	60.648
M5161	60.648
M5716	60.648
M649	60.648
M12767	60.648
M12768	60.648
M189	60.648
M190	60.648
M443	60.648
M12769	60.648
M11088	60.648
M32304	60.648
M32303	60.648
M33170	60.648
M4297	60.648
M6572	60.648
M6570	60.648
M26337	60.648
M29653	61.243
M26495	61.243
M29420	61.243
M29419	61.243
M34229	61.243
M21593	61.243
M26723	61.243
M30593	61.243
M7258	61.243
M10948	61.243
M28785	61.243
M31658	61.243
M31657	61.243
M31656	61.243
M31659	61.243
M33245	61.243
M33244	61.243
M4324	61.243
M6910	61.243
M16112	61.243
M8800	61.243
M8799	61.243
M7999	61.243
M2959	61.243
M7968	61.243
M12084	61.243
M3953	61.243
M3954	61.243
M12675	61.243
M12674	61.243
M229	61.243
M10291	61.243
M4500	61.243
M17229	61.243
M17228	61.243
M7182	61.243
M21441	61.243
M16808	61.243
M19250	61.243
M4033	61.243
M851	61.243
M20735	61.243
M3979	61.243
M18221	61.243
M19207	61.243
M16875	61.243
M16876	61.243
M20633	61.243
M1302	61.243
M9555	61.243
M2823	61.243
M17386	61.243
M10290	61.243
M10289	61.243
M1291	61.243
M1292	61.243
M21335	61.243
M21336	61.243
M21334	61.243
M6753	61.243
M21965	61.243
M15652	61.243
M15653	61.243
M24028	61.243
M7092	61.243
M17875	61.243
M19511	61.243
M17425	61.243
M17426	61.243
M16019	61.243
M4179	61.243
M4180	61.243
M4181	61.243
M29397	61.54
M29398	61.54
M9724	64.043
M9725	64.043
M20019	64.043
M20020	64.638
M24877	64.638
M27756	64.638
M27757	64.638
M27758	64.638
M26500	64.945
M26501	64.945
M26499	64.945
M30004	64.945
M30005	64.945
M28160	64.945
M28161	64.945
M28162	64.945
M27787	64.945
M27788	64.945
M27789	64.945
M26287	64.945
M26288	64.945
M26289	64.945
M27473	64.945
M27475	65.242
M27474	65.242
M27323	65.242
M27324	65.54
M27325	65.54
M27833	65.54
M27831	65.54
M27832	65.54
M27455	65.54
M27456	65.54
M27457	65.54
M28608	65.54
M28605	65.54
M28606	66.433
M28607	66.433
M19262	66.433
M28227	66.433
M28226	66.433
M28228	66.433
M30038	66.433
M30039	66.433
M30036	66.433
M30037	66.433
M28899	66.433
M26630	66.433
M26631	66.433
M26632	66.433
M26633	66.433
M11903	66.433
M11905	66.433
M26226	66.433
M26228	66.433
M26227	66.433
M27052	66.433
M27053	66.433
M27051	66.433
M27054	66.433
M30577	66.433
M30579	66.433
M28900	66.433
M28898	66.433
M28910	66.433
M28911	66.433
M28909	66.433
M28912	66.433
M27812	66.433
M27811	66.433
M27813	66.739
M27814	66.739
M26373	66.739
M26375	66.739
M26372	66.739
M26374	66.739
M28651	66.739
M28652	66.739
M28653	66.739
M28403	66.739
M28404	66.739
M20021	66.739
M11904	66.739
M20010	67.037
M20012	67.037
M20013	67.037
M29293	67.037
M29294	67.335
M30308	67.335
M30309	67.335
M27358	67.335
M27360	67.335
M26150	67.335
M26151	67.93
M26152	67.93
M32751	67.93
M32750	67.93
M32752	67.93
M32753	67.93
M22878	67.93
M22877	67.93
M26204	67.93
M26189	67.93
M26191	67.93
M26190	67.93
M28440	67.93
M28442	67.93
M28441	67.93
M30877	67.93
M30876	67.93
M27359	67.93
M28430	67.93
M28432	67.93
M28431	67.93
M12043	67.93
M12044	67.93
M12045	67.93
M28702	67.93
M28700	67.93
M28701	68.228
M28703	68.228
M28101	69.121
M28099	69.121
M28100	69.121
M27447	69.121
M27446	69.121
M27448	69.121
M28966	69.121
M28967	69.121
M28968	69.121
M28715	69.121
M28716	69.121
M28717	69.121
M15934	69.716
M5515	69.716
M5516	70.311
M16938	70.311
M16937	70.609
M27929	70.609
M11615	70.609
M20430	70.906
e	70.906
M3582	70.906
M3583	70.906
M20011	70.906
M18701	70.906
M18700	70.906
M797	70.906
M796	70.906
M23416	70.906
M26439	70.906
M19866	70.906
M798	71.204
M11305	71.204
M11302	71.204
M3525	71.204
M3524	71.204
M12343	71.799
M11871	71.799
M7529	72.097
M30624	72.097
M14053	72.097
M10602	72.692
M6291	72.692
M19872	72.692
M20413	72.692
M20414	72.692
M13688	72.692
M6571	72.692
M31894	72.692
M779	72.692
M3338	72.692
M15009	72.692
M21044	72.692
M32604	72.692
M32534	72.692
M29891	72.692
M17011	72.692
M33495	72.692
M32714	72.692
M28646	72.692
M15010	72.692
M31863	72.692
M17442	72.692
M15564	72.692
M1721	72.692
M13530	72.692
M20795	72.692
M25098	72.692
M32444	72.692
M20194	72.692
M3854	72.692
M3855	72.692
M17499	72.692
M19492	72.692
M20511	72.692
M20512	72.692
M11376	72.692
M14762	72.692
M14763	72.692
M18875	72.692
M4088	72.692
M4089	72.692
M14718	72.692
M14719	72.692
M3844	72.692
M19320	72.692
M19321	72.692
M21265	72.692
M19420	72.692
M13745	72.692
M19286	72.692
M19285	72.692
M20412	72.692
M31800	72.692
M11620	72.692
M32549	72.692
M10372	72.692
M33337	72.692
M33338	72.692
M12471	72.692
M3362	72.692
M3361	72.692
M13265	72.692
M13266	72.692
M20789	72.692
M27780	73.287
M27225	73.287
M27224	73.287
M4243	73.287
M21629	73.287
M6841	73.287
M6842	73.287
M16788	73.287
M16787	73.287
M7713	73.287
M32312	73.287
M9181	73.287
M1857	73.287
M21695	73.287
M20945	73.287
M20946	73.287
M18288	73.287
M1200	73.287
M1199	73.287
M1198	73.287
M1201	73.287
M21664	73.287
M7445	73.585
M5497	73.585
M20330	73.585
M4295	73.585
M4296	73.585
M5065	73.585
M5064	73.585
M32692	73.585
M32693	73.585
M32545	73.585
M15461	73.585
M13926	73.585
M15462	73.585
M5273	73.585
M19447	73.585
M19448	73.585
M21913	73.585
M2824	73.585
M28339	73.585
M28340	73.585
M28341	73.585
M4345	73.585
M27978	73.585
M14555	73.585
M14554	73.585
M21663	73.585
M19123	73.585
M15824	73.585
M18065	73.585
M18064	73.585
M18062	73.585
M18063	73.585
M19319	73.585
M28159	73.585
M6942	73.585
M31668	73.585
M9762	73.585
M10478	73.585
M3540	73.585
M3541	73.585
M19738	73.585
M3842	73.585
M3843	73.585
M15496	73.585
M1576	73.585
M10590	74.18
M13510	74.18
M30613	74.776
M20815	74.776
M21143	75.668
M6763	75.668
M11073	75.668
M11074	75.668
M20794	75.668
M580	75.668
M581	75.668
M9380	75.668
M8436	75.668
M11634	75.668
M20321	75.966
M8026	75.966
M8027	75.966
M11242	75.966
M18937	75.966
M6949	75.966
M11118	75.966
M18716	75.966
M18715	75.966
M12006	75.966
M12005	75.966
M13186	75.966
M13187	75.966
M13185	75.966
M19069	75.966
M12042	75.966
M19354	75.966
M6895	75.966
M29568	75.966
M2127	75.966
M2128	75.966
M15264	75.966
M559	75.966
M29510	75.966
M32251	75.966
M29508	75.966
M29509	75.966
M10703	75.966
M32089	75.966
M5568	75.966
M10368	75.966
M10369	75.966
M2815	75.966
M12259	75.966
M12260	75.966
M1216	75.966
M11313	75.966
M11312	75.966
M14169	75.966
M14624	75.966
M19822	75.966
M13954	75.966
M20169	75.966
M13412	75.966
M7099	75.966
M7100	75.966
M10962	75.966
M9806	75.966
M14676	75.966
M19451	75.966
M19450	75.966
M19452	75.966
M14889	75.966
M14888	75.966
M14890	75.966
M13145	75.966
M19279	75.966
M28738	75.966
M28739	75.966
M20220	75.966
M11692	75.966
M3733	75.966
M3734	75.966
M3732	75.966
M32339	75.966
M29574	75.966
M5333	75.966
M16097	75.966
M16098	75.966
M21306	75.966
M21284	75.966
M17134	75.966
M17135	75.966
M10975	75.966
M18938	75.966
M18939	75.966
M891	75.966
M2863	75.966
M6078	75.966
M11085	75.966
M16464	75.966
M16465	75.966
M31991	75.966
M12898	75.966
M2384	75.966
M18717	75.966
M7428	75.966
M2395	75.966
M9612	75.966
M5280	76.264
M1195	76.264
M1194	76.264
M1193	76.264
M4165	76.264
M14168	76.264
M8865	76.264
M32740	76.264
M11743	76.264
M11744	76.264
M11745	76.264
M32791	76.264
M27427	76.264
M27428	76.264
M32790	76.264
M941	76.264
M18579	76.264
M1421	76.264
M28271	76.264
M655	76.264
M15434	76.264
M15435	76.264
M15432	76.264
M15433	76.264
M5462	76.264
M5822	76.264
M3706	76.264
M2742	76.264
M2743	76.264
M2978	76.264
M2196	76.264
M2197	76.264
M1241	76.264
M31308	76.264
M34217	76.264
M27501	76.264
M30741	76.264
M19848	76.264
M19845	76.264
M19847	76.264
M19846	76.264
M2027	76.264
M4803	76.264
M12023	76.264
M12024	76.264
M2744	76.264
M15214	76.264
M15213	76.264
M940	76.264
M15539	76.264
M2844	76.264
M2845	76.264
M1043	76.264
M1044	76.264
M3534	76.264
M32651	76.264
M26929	76.264
M22490	76.264
M15417	76.264
M21212	76.264
M34220	76.264
M34219	76.264
M19323	76.264
M19324	76.264
M17655	76.264
M3597	76.264
M3596	76.264
M30294	76.264
M382	76.264
M383	76.264
M10406	76.264
M12183	76.264
M12184	76.264
M5642	76.264
M8614	76.264
M8615	76.264
M20241	76.264
M20242	76.264
M21251	76.264
M21250	76.264
M5826	76.561
M5827	76.561
M5828	76.561
M5829	76.561
M5830	76.561
M5729	76.561
M5728	76.561
M26722	76.561
M33374	76.561
M16492	76.561
M16493	76.561
M27383	76.561
M29890	77.157
M16073	77.157
M26032	77.157
M26034	77.157
M26033	77.157
M3812	77.157
M3813	77.157
M9869	77.157
M9868	77.157
M24503	77.157
M24504	77.157
M9336	77.157
M1293	77.157
M12761	77.157
M9480	77.157
M17181	77.157
M17182	77.157
M188	77.157
M10027	77.157
M23547	77.157
M22707	77.157
M14729	77.157
M13677	77.157
M13678	77.157
M13429	77.157
M13430	77.157
M3052	77.157
M3053	77.157
M12400	77.157
M7867	77.157
M7868	77.157
M12399	77.157
M2736	77.157
M5160	77.157
M9785	77.157
M1319	77.157
M18714	77.157
M6345	77.157
M10624	77.157
M10623	77.157
M13608	77.157
M32696	77.157
M32337	77.157
M17995	77.157
M17996	77.157
M2714	77.157
M2713	77.157
M15020	77.157
M32313	77.157
M20346	77.157
M13297	77.157
M21283	77.157
M10077	77.157
M27781	77.157
M27782	77.157
M20451	77.454
M22377	77.454
M22194	77.454
M22193	77.454
M22195	77.454
M8070	77.454
M21821	77.454
M15885	77.454
M3926	77.454
M7566	77.454
M7567	77.454
M13060	77.454
M13061	77.454
M12352	77.454
M13580	77.454
M1497	77.454
M10965	77.454
M381	77.454
M384	77.454
M33307	77.454
M33308	77.454
M18899	77.454
M17380	77.454
M11890	77.454
M15136	77.454
M20366	77.454
M10689	77.454
M10690	77.454
M4464	77.454
M11123	77.454
M15130	77.454
M32353	77.454
M3519	77.454
M6138	77.454
M12956	77.454
M11249	77.454
M13683	77.454
M33284	77.454
M12765	77.454
M11967	77.454
M1829	77.454
M30003	77.454
M6370	77.454
M16684	77.454
M30697	77.454
M32936	77.454
M32937	77.454
M2847	77.454
M26882	77.454
M19296	77.454
M5818	77.454
M5819	77.454
M28881	77.454
M1631	77.454
M5649	77.454
M5820	77.454
M1348	77.454
M10295	77.752
M26724	77.752
M28770	77.752
M29934	78.347
M23120	78.347
M14091	79.3
M14092	79.3
M14770	79.3
M19900	79.3
M32899	79.597
M32900	79.597
M18948	79.597
M23761	79.597
M11858	79.597
M3643	79.895
M3644	79.895
M15515	79.895
M15514	79.895
M21122	79.895
M21123	79.895
M21121	80.193
M13414	80.193
M16580	80.193
M16579	80.193
M11181	80.193
M11182	80.788
M11183	80.788
M6568	80.788
M6569	80.788
M31525	80.788
M16263	80.788
M13413	80.788
M15471	80.788
M15472	80.788
M14237	81.085
M8406	81.085
M12834	81.085
M15954	81.085
M3818	81.085
M11933	81.085
M5823	81.085
M19380	81.085
M8174	81.085
M32645	81.085
M18085	81.085
M18086	81.085
M15750	81.085
M15751	81.085
M19345	81.085
M1542	81.085
M4690	81.085
M8464	81.085
M7614	81.085
M5398	81.085
M15845	81.085
M18239	81.085
M20910	81.085
M6236	81.085
M6237	81.085
M16264	81.681
M16265	81.681
M13085	81.681
M460	81.681
M26172	81.681
M13198	81.681
M13199	81.681
M18231	81.681
M18230	81.681
M459	81.681
M5980	81.681
M31634	81.681
M11290	81.681
M19122	81.681
M10894	81.681
M10895	81.681
M21012	81.681
M21011	81.681
M4689	81.681
M11048	81.681
M11049	81.681
M10288	81.681
M31493	81.681
M27268	81.681
M14942	81.681
M14941	81.681
M16716	81.681
M16717	81.681
M16718	81.681
M16719	81.681
M17180	81.681
M17179	81.681
M32242	81.681
M32243	81.681
M6137	81.681
M6134	81.681
M6135	81.681
M6136	81.681
M28219	81.681
M28218	81.681
M28220	81.681
M29262	81.681
M29263	81.681
M29264	81.681
M27966	81.681
M27964	81.681
M27965	81.681
M28868	81.681
M28869	81.681
M28870	81.681
M14090	81.681
M14088	81.681
M14089	81.681
M33856	81.681
M17219	81.681
M17220	81.681
M2895	81.681
M30453	81.681
M3096	81.681
M15960	81.681
M20521	81.681
M23842	81.681
M23841	81.681
M23840	81.681
M23843	81.681
M14496	81.681
M27738	81.681
M27739	81.681
M27740	81.681
M27274	81.681
M27275	81.681
M27273	81.681
M28672	81.681
M28673	81.681
M28671	81.681
M26201	81.681
M26202	81.681
M26203	81.978
M7094	81.978
M12991	81.978
M12992	82.276
M12993	82.276
M6725	82.276
M6724	82.276
M6726	82.276
M30365	82.276
M5717	82.276
M5718	82.276
M5719	82.276
M4266	82.276
M4267	82.276
M19909	82.276
M207	82.574
M14196	82.574
M2160	82.871
M12626	82.871
M12627	82.871
M1800	82.871
M8793	82.871
M8794	82.871
M5904	83.169
M5905	83.169
M5903	83.466
M25362	83.466
M28349	83.764
M28348	83.764
M28347	83.764
M28031	83.764
M28032	83.764
M28033	83.764
M18702	84.062
M12994	84.062
M22453	84.062
M22454	84.062
M22452	84.657
M18630	84.657
M18633	84.657
M19423	84.657
M34114	84.657
M4247	84.657
M5408	84.657
M1506	84.657
M1507	85.252
M7864	85.252
M14851	85.847
M14957	85.847
M16641	86.145
M2896	86.145
M30369	86.145
M26028	87.038
M32945	87.038
M1858	87.038
M12856	87.038
M12857	87.038
M17578	87.038
M12892	87.038
M99	87.038
M100	87.038
M32449	87.038
M17247	87.038
M17246	87.038
M21286	87.038
M21285	87.038
M9335	87.038
M23926	87.038
M14803	87.038
M12833	87.038
M17417	87.038
M19258	87.038
M17071	87.038
M15505	87.038
M15502	87.038
M15503	87.038
M15504	87.038
M13841	87.038
M14681	87.038
M19660	87.038
M8029	87.038
M8028	87.038
M17916	87.038
M1781	87.038
M22326	87.038
M22327	87.038
M23342	87.038
M23341	87.038
M3261	87.038
M18947	87.038
M23251	87.038
M23250	87.038
M6197	87.038
M6195	87.038
M3921	87.038
M3922	87.038
M28823	87.038
M28824	87.038
M28825	87.038
M28297	87.038
M29212	87.633
M9049	87.633
M4491	87.633
M2006	87.633
M3483	87.633
M9855	87.633
M15346	87.633
M6573	87.633
M19576	87.633
M20686	87.633
M2715	87.633
M4112	87.633
M2776	87.633
M2777	87.633
M5034	87.633
M3726	87.633
M12350	87.633
M4694	87.633
M15651	87.633
M15650	87.633
M15122	87.633
M17199	87.633
M2	87.633
M16460	87.633
M16461	87.633
M4573	87.633
M10054	87.633
M1907	87.633
M18245	87.633
M28298	87.931
M28299	87.931
M4038	87.931
M22250	87.931
M23762	87.931
M3753	87.931
M10516	87.931
M15777	87.931
M11429	87.931
M6229	87.931
M12208	87.931
M3	87.931
M1	87.931
M632	87.931
M5266	87.931
M5267	87.931
M5264	87.931
M5265	87.931
M8407	87.931
M1459	87.931
M1458	87.931
M15073	87.931
M7473	87.931
M6196	87.931
M6198	87.931
M6794	88.526
M15994	88.526
M15995	88.526
M21092	88.526
M11024	88.526
M32581	88.526
M18598	88.526
M4571	88.526
M4572	88.526
M16599	88.526
M3576	88.526
M2282	88.526
M19172	88.526
M5632	88.526
M31728	88.526
M31729	88.526
M29172	88.526
M29173	88.526
M29171	88.526
M18632	88.526
M15562	88.526
M15563	88.526
M24122	88.526
M16647	88.824
M9317	88.824
M18631	89.419
M15145	89.419
M15625	92.72
M33291	92.72
M23741	93.017
M30081	93.017
M30082	93.017
M30083	93.017
M25990	93.017
M25991	93.017
M25988	93.017
M25989	93.315
M29643	93.315
M29644	93.315
M29645	93.315
M28735	93.315
M28736	93.613
M28737	93.613
M27045	93.613
M27047	93.613
M27046	93.613
M10551	93.613
M10547	93.613
M10549	93.613
M27018	93.613
M27019	93.613
M27020	93.613
M27151	93.613
M27152	93.613
M27153	93.91
M27154	93.91
M25945	93.91
M25943	93.91
M25946	94.208
M25944	94.208
M3752	94.505
M3750	94.505
M3751	94.505
M10550	95.101
M10552	95.101
M10546	95.398
M10548	95.398
M29213	96.887
M29211	96.887
M21114	99.628
M9334	99.628
M20540	100.521
M10388	100.521
M15776	100.521
M18704	100.521
M18705	100.521
M27218	100.521
M18254	100.521
M18255	100.521
M29276	101.116
M29275	101.116
M13489	102.435
M28562	102.435
M28564	102.435
M28561	102.435
M28563	102.435
M27732	102.435
M27733	102.435
M27730	102.435
M27731	102.435
M26292	102.732
M26293	102.732
M26294	102.732
M17555	106.19
M17554	106.19
M11946	106.786
M10910	106.786
M30549	106.786
M2156	106.786
M2157	107.083
M2155	107.083
M3545	107.679
M3546	107.679
M6662	107.679
M12416	107.679
M15360	107.679
M15359	107.976
M16882	107.976
M14717	108.571
M14776	108.571
M27714	108.571
M27713	108.571
M16261	108.571
M1431	108.571
M13503	108.869
M4983	108.869
M3168	108.869
M3169	108.869
M30656	108.869
M13602	108.869
M5725	108.869
M21023	108.869
M790	108.869
M19515	108.869
M19514	108.869
M4398	108.869
M4399	108.869
M32189	108.869
M21043	108.869
M20767	108.869
M20766	108.869
M5103	108.869
M18	109.167
M7632	109.167
M6371	109.167
M6372	110.119
M30547	110.119
M13528	110.714
M13529	110.714
M11529	111.012
M15785	111.012
M15784	111.012
M31113	111.012
M33874	111.012
M14768	111.012
M3235	111.012
M5687	111.012
M14500	111.012
M17850	111.012
M8604	111.012
M21559	111.012
M20589	111.012
M31646	111.012
M28357	111.012
M33055	111.012
M3650	111.012
M21085	111.965
M21084	111.965
M14766	111.965
M20739	113.811
M20738	113.811
M20737	116.014
M28526	116.014
M28524	116.312
M28525	116.312
M19313	117.265
M4521	117.265
M4522	117.265
M27380	117.265
M27381	117.265
M27382	117.265
M247	117.265
M27443	117.265
M27442	117.265
M27444	117.265
M27445	117.265
M5990	117.265
M5989	117.265
M8792	117.265
M14427	117.265
M17670	117.265
M17669	117.265
M19416	117.265
M24201	117.265
M23053	117.265
M7686	117.265
M4520	117.265
M12544	117.265
M12545	117.265
M9867	117.86
M12142	117.86
M8154	117.86
M5035	117.86
M28356	117.86
M14767	117.86
M13747	117.86
M12452	117.86
M13774	117.86
M13775	117.86
M13748	117.86
M9570	118.157
M3816	118.157
M2320	118.157
M20390	118.157
M25075	118.157
M12441	118.157
M12442	118.157
M1012	118.157
M15440	118.157
M15441	118.157
M22736	118.157
M27881	118.157
M27882	118.157
M29519	118.157
M29464	118.157
M29465	118.157
M29466	118.157
M22283	118.157
M25956	118.157
M25955	118.157
M8265	118.157
M3560	118.157
M3561	118.157
M1818	118.157
M15703	118.157
M15704	118.157
M31962	118.455
M16328	118.455
M10486	118.753
M11489	118.753
M11490	118.753
M14	118.753
M17557	118.753
M21133	118.753
M726	118.753
M1144	118.753
M32135	118.753
M7809	118.753
M7810	119.05
M7811	119.05
M27971	119.05
M27972	119.05
M16624	119.05
M4061	119.05
M12788	119.348
M11617	119.348
M11618	119.348
M4857	119.348
M18566	119.348
M29277	119.348
M20757	121.194
M11523	121.194
M14608	123.338
M29874	123.338
M15493	124.231
M9100	124.231
M484	124.529
M9846	124.529
M14495	124.826
M15267	124.826
M14324	125.124
M8232	125.124
M8834	125.124
M8835	125.124
M7181	125.124
M7180	125.124
M15266	125.124
M10006	125.124
M10007	125.124
M1585	125.124
M32203	125.719
M15265	125.719
M1320	125.719
M1321	125.719
M5770	125.719
M5769	125.719
M9048	126.315
M7965	126.315
M3278	126.315
M3277	126.315
M11885	127.267
M11886	127.267
M13488	127.267
M8331	127.267
M2250	127.267
M11014	127.267
M11015	127.267
M11016	127.267
M307	127.267
M22419	127.267
M19747	127.267
M29941	127.267
M29939	127.267
M29940	127.267
M29942	127.267
M14437	127.565
M22503	127.565
M10643	127.565
M10644	127.565
M20484	127.565
M13896	127.565
M14334	127.565
M14333	127.565
M17186	127.565
M8783	127.565
M8784	127.565
M8785	127.565
M1609	127.565
M2084	127.565
M17277	127.565
M12012	127.565
M12011	127.565
M1284	127.565
M14653	127.565
M856	127.565
M12050	127.565
M2190	128.586
M11035	128.586
M30660	128.586
M20553	128.586
M18800	128.586
M13138	128.883
M18534	128.883
M20998	128.883
M11258	128.883
M21616	129.181
M20359	129.181
M19328	129.181
M19329	129.181
M20251	129.181
M403	129.181
M12503	129.776
M12504	129.776
M12505	130.729
M9234	130.729
M26934	131.026
M26933	131.026
M26936	131.026
M26935	131.026
M9098	131.026
M9101	134.484
M2260	134.484
M9233	136.688
M27845	136.688
M27843	136.688
M27844	140.805
M9099	140.805
M15003	144.451
M20944	144.451
M10450	144.451
M10449	144.451
M2210	144.451
M26427	144.451
M2550	144.451
M17901	144.451
M17899	144.451
M17900	144.451
M20940	144.451
M20941	144.451
M16096	144.451
M19643	144.451
M19099	144.451
M15039	144.451
M14302	144.451
M14303	144.451
M14301	144.451
M28367	144.451
M32063	144.749
M32064	144.749
M16256	144.749
M25958	145.999
M25961	145.999
M25959	145.999
M25960	145.999
M21684	146.297
M21685	146.297
M15352	146.297
M21477	146.297
M14399	146.297
M12338	146.297
M88	146.297
M15325	146.297
M31563	146.297
M2285	146.297
M10709	146.297
M16458	146.297
M13693	146.297
M1512	146.297
M19658	146.297
M19656	146.297
M19657	146.297
M17352	146.594
M8931	146.594
M23466	146.594
M21136	146.594
M7448	146.594
M9521	146.594
M18154	146.892
M18155	146.892
M28839	147.189
M28840	147.189
M28842	147.189
M28841	147.189
M28468	147.189
M28470	147.189
M28469	147.189
M28437	147.189
M28438	147.189
M28439	147.487
M28436	147.487
M16468	147.487
M16467	147.487
M16466	147.487
M29081	147.487
M29082	147.487
M29080	147.487
M29987	148.082
M29988	148.082
M29989	148.082
M18383	148.38
M11680	148.38
M16470	148.38
M16469	148.975
M30706	148.975
M30707	148.975
M9294	148.975
M1455	148.975
M1457	149.273
M1456	149.273
M4011	149.273
M27958	149.273
M27957	149.273
M27959	150.225
M27960	150.225
M11185	150.225
M9972	150.225
M23458	150.225
M13751	150.225
M11400	150.225
M27699	150.523
M27698	150.523
M27697	150.523
M26396	150.523
M26397	150.523
M26398	151.475
M26395	151.475
M21219	151.773
M6272	151.773
M32742	153.023
M32741	153.023
M9520	153.023
M21124	153.321
M2666	153.321
M2667	153.321
M6774	153.321
M224	153.321
M225	153.321
M10209	153.321
M12587	153.321
M23601	153.321
M23602	153.321
M23603	153.321
M6124	153.321
M4712	153.321
M10663	153.321
M10661	153.321
M10662	153.321
M654	153.321
[truncated: 97 more rows]

## Sheet: LG5
SNP code in LG5	Genetic distance（cM）
M19222	0
M11736	0
M18409	0
M33084	0
M6936	0.307
M11200	0.307
M11199	0.924
M1224	0.924
M23282	1.222
M22891	1.222
M29967	1.222
M12835	2.77
M17722	2.77
M26360	2.77
M26146	4.675
M18462	4.675
M29012	4.675
M29013	6.352
M29488	6.352
M6354	7.9
M23698	7.9
M4713	8.495
M27623	8.495
M27622	8.495
M6915	10.043
M6916	10.043
M1425	10.341
M28205	10.341
M28206	10.936
M8334	10.936
M12305	10.936
M6302	10.936
M6303	10.936
M6301	11.234
M17106	11.234
M17105	11.829
M5461	11.829
M20133	12.424
M19232	12.424
M17745	12.424
M9640	13.973
M9641	13.973
M3107	13.973
M2186	15.223
M16792	15.223
M12202	15.52
M12201	15.52
M12200	15.52
M26120	15.52
M26121	15.52
M26122	15.52
M28661	15.818
M28662	15.818
M28660	16.116
M26497	16.116
M26498	16.116
M26496	16.116
M27355	16.116
M27356	16.116
M27357	16.116
M28243	16.116
M28241	16.116
M28242	16.116
M2202	16.116
M2203	16.116
M13311	16.116
M13312	16.711
M13307	16.711
M13308	16.711
M13309	17.663
M13310	17.663
M29403	18.259
M29404	18.259
M9340	19.152
M916	19.152
M917	21.654
M29267	21.654
M13995	21.654
M28609	21.654
M28610	21.654
M28611	21.654
M28612	21.654
M28859	21.654
M28862	21.654
M28861	21.654
M28860	21.654
M27856	21.654
M27857	21.654
M27858	21.654
M27859	21.654
M25920	21.654
M25919	21.654
M25921	21.654
M26429	21.654
M26430	21.654
M26431	21.654
M26432	21.654
M28930	21.654
M28931	21.654
M28929	21.654
M10118	21.951
M10117	21.951
M19810	21.951
M28980	22.547
M17302	22.547
M1436	22.547
M7102	22.547
M7101	22.547
M27679	22.547
M27680	22.547
M27681	22.547
M28597	22.547
M28598	22.547
M28599	22.547
M23098	22.547
M23097	22.547
M16283	22.844
M17787	22.844
M17789	23.142
M17788	23.142
M17796	23.737
M17797	23.737
M29113	23.737
M29114	23.737
M29115	23.737
M34232	23.737
M34231	23.737
M28973	23.737
M28974	24.035
M26907	24.035
M26908	24.035
M26909	24.035
M28080	24.035
M28081	24.035
M28082	24.035
M28456	24.035
M28453	24.035
M28454	24.035
M28455	24.035
M26367	24.035
M26366	24.035
M26368	24.035
M6786	24.035
M27125	24.035
M17798	24.035
M19336	24.035
M13910	24.035
M13909	24.035
M13911	24.035
M28378	24.035
M28379	24.035
M28380	24.035
M29016	24.035
M29018	24.035
M29017	24.035
M26864	24.035
M26865	24.035
M26866	24.035
M30390	25.285
M1632	25.285
M1633	25.285
M1634	25.285
M9710	25.285
M9709	25.285
M4513	25.583
M1054	25.583
M17455	25.583
M17456	25.583
M17457	25.583
M19650	25.583
M12301	25.583
M5657	25.583
M4474	25.583
M13485	25.88
M11163	25.88
M11164	25.88
M6967	25.88
M2875	25.88
M2874	25.88
M461	25.88
M13133	25.88
M861	25.88
M862	25.88
M13417	25.88
M13416	25.88
M3571	25.88
M18099	25.88
M17400	25.88
M5351	25.88
M5350	25.88
M28749	25.88
M28750	25.88
M28751	25.88
M18565	25.88
M13126	25.88
M18785	25.88
M5275	25.88
M6530	25.88
M12239	25.88
M12240	25.88
M1821	25.88
M1822	25.88
M10642	25.88
M12802	25.88
M31568	25.88
M15902	25.88
M20811	25.88
M20812	25.88
M31918	25.88
M20136	25.88
M4978	25.88
M4979	25.88
M2332	25.88
M30647	25.88
M30648	25.88
M2504	25.88
M2848	25.88
M15328	25.88
M13724	25.88
M3846	25.88
M3847	25.88
M3845	25.88
M11783	25.88
M20899	25.88
M20900	25.88
M21091	25.88
M635	25.88
M12930	25.88
M12931	25.88
M18387	25.88
M10375	25.88
M25924	25.88
M25922	25.88
M25923	25.88
M19246	25.88
M19247	25.88
M11575	25.88
M11576	25.88
M13645	25.88
M23234	25.88
M9808	25.88
M2216	25.88
M20277	25.88
M20898	25.88
M10733	25.88
M5043	25.88
M11253	25.88
M11254	25.88
M7600	25.88
M7455	25.88
M11259	25.88
M11260	25.88
M33762	25.88
M33761	25.88
M17589	25.88
M22971	25.88
M3828	25.88
M5437	25.88
M17830	25.88
M17831	25.88
M5110	26.178
M5111	26.178
M11503	26.773
M9136	26.773
M22007	26.773
M3419	26.773
M3420	26.773
M3418	26.773
M21964	26.773
M23329	26.773
M23327	26.773
M23328	26.773
M11710	27.368
M11711	27.368
M19275	27.368
M6271	27.368
M5614	27.368
M21636	27.368
M12557	27.368
M20772	27.368
M2712	27.368
M19309	27.368
M19308	27.368
M11675	27.368
M11676	27.368
M11673	27.368
M11674	27.368
M15584	27.368
M17148	27.368
M29272	27.666
M29271	27.666
M29273	27.666
M19131	27.666
M17510	27.666
M22105	27.666
M24999	27.666
M25000	27.666
M3801	27.666
M3802	27.666
M22798	27.666
M4484	27.666
M29629	27.666
M24422	27.666
M24421	27.666
M24864	27.666
M24863	27.666
M13790	27.666
M13788	27.666
M26354	27.666
M26352	27.666
M26355	27.666
M26353	27.666
M24521	27.666
M2007	27.666
M24035	27.666
M24036	27.666
M24037	27.666
M5833	27.666
M16414	27.666
M16413	27.964
M32147	27.964
M7636	27.964
M31477	27.964
M15568	27.964
M15569	27.964
M31434	27.964
M4253	27.964
M21111	27.964
M27122	27.964
M27124	27.964
M27123	27.964
M15469	27.964
M24332	27.964
M24331	27.964
M184	27.964
M186	27.964
M185	27.964
M187	27.964
M21142	27.964
M20696	28.559
M20697	28.559
M18931	28.559
M18932	29.452
M15454	29.452
M3707	30.047
M20617	30.047
M23031	30.642
M12144	30.642
M20914	31.238
M28806	31.238
M28808	31.238
M28807	31.238
M28809	34.696
M33271	34.696
M212	34.696
M213	35.291
M211	35.291
M11327	35.886
M16418	35.886
M16419	35.886
M21481	35.886
M5862	35.886
M7700	35.886
M3839	35.886
M17885	35.886
M14632	35.886
M5245	35.886
M11712	35.886
M4244	35.886
M4821	35.886
M17476	35.886
M12654	35.886
M26020	35.886
M26022	35.886
M26021	35.886
M26260	35.886
M26262	35.886
M26261	35.886
M26263	35.886
M26584	35.886
M1875	35.886
M1876	35.886
M9658	35.886
M9657	35.886
M16238	35.886
M21628	35.886
M20107	35.886
M18218	35.886
M18219	35.886
M18217	35.886
M6840	35.886
M21322	35.886
M5942	35.886
M18317	35.886
M9917	35.886
M20745	35.886
M6607	35.886
M23	35.886
M24	36.184
M21132	36.184
M6266	36.184
M6265	36.184
M22648	36.184
M29256	36.184
M29255	36.184
M32361	36.481
M32362	36.481
M21474	36.481
M6938	36.481
M3122	36.481
M5695	36.481
M13629	36.481
M29079	36.481
M29076	36.481
M29078	36.481
M29886	37.077
M29888	37.077
M29887	37.077
M15654	37.077
M5553	37.077
M9426	37.077
M10710	37.374
M4194	37.374
M8691	37.374
M26199	37.374
M26200	37.374
M26198	37.374
M13306	37.374
M17779	37.374
M4365	37.374
M4366	37.374
M30420	37.374
M30421	37.374
M26297	37.374
M26298	37.374
M26299	37.374
M11561	37.374
M11560	37.374
M15403	37.374
M3229	37.374
M3230	37.672
M323	37.672
M324	37.672
M325	37.672
M5106	37.672
M5107	38.267
M18916	38.267
M29254	38.267
M33203	38.267
M29152	38.267
M29153	38.267
M29154	38.267
M27138	38.267
M27136	38.267
M27137	38.267
M28877	38.267
M28879	38.267
M28878	38.267
M18144	38.267
M18146	38.267
M18145	38.267
M8694	38.267
M12928	38.267
M28709	38.267
M28708	38.267
M28710	38.267
M30720	38.267
M642	38.267
M7183	38.267
M28678	38.267
M28679	38.267
M28680	38.267
M28677	38.267
M844	38.267
M845	38.267
M846	38.267
M29203	38.267
M29202	38.267
M29204	38.267
M15184	38.565
M15185	38.565
M24520	38.565
M24519	38.565
M24518	38.565
M3941	38.565
M3942	38.565
M13830	39.16
M13831	39.16
M4669	39.16
M4667	39.16
M4668	39.16
M5002	39.16
M5001	39.16
M31945	39.16
M31944	39.16
M18929	39.16
M20517	39.16
M11357	39.16
M23631	39.16
M34142	39.16
M8790	39.16
M8791	39.16
M15225	39.458
M15226	39.458
M1847	39.458
M8544	39.458
M8545	39.458
M8543	39.458
M15270	39.458
M11018	39.458
M11017	39.458
M22905	39.458
M1754	39.458
M11252	39.458
M11251	39.458
M3762	39.458
M3761	39.458
M20269	39.458
M5640	39.458
M13193	39.458
M14172	39.458
M14171	39.458
M19132	39.458
M331	39.458
M10545	39.458
M20270	39.458
M20268	39.458
M10531	39.458
M12575	39.458
M7998	39.458
M11300	39.458
M13285	39.458
M11275	39.458
M16158	39.458
M3063	39.458
M5513	39.755
M19908	39.755
M396	39.755
M15918	39.755
M30	39.755
M12921	39.755
M31793	39.755
M31794	39.755
M16175	39.755
M9618	39.755
M10949	39.755
M14622	39.755
M14802	39.755
M14801	39.755
M27749	39.755
M27747	39.755
M27748	39.755
M4750	39.755
M7368	39.755
M4974	39.755
M417	39.755
M28300	39.755
M28301	39.755
M28302	39.755
M12925	39.755
M31678	39.755
M1635	39.755
M21386	39.755
M15355	39.755
M1914	39.755
M594	39.755
M4364	39.755
M3903	39.755
M8838	39.755
M15557	39.755
M15558	39.755
M12379	39.755
M13945	39.755
M14167	39.755
M1262	39.755
M2081	39.755
M17537	39.755
M13916	39.755
M6650	39.755
M6651	39.755
M6649	39.755
M15000	39.755
M15812	39.755
M15809	39.755
M15810	39.755
M15811	39.755
M15001	39.755
M20597	39.755
M15841	39.755
M859	39.755
M13190	39.755
M13191	39.755
M19891	39.755
M29984	39.755
M29986	39.755
M32378	39.755
M32377	39.755
M311	39.755
M17166	39.755
M15157	39.755
M9352	39.755
M7239	39.755
M11861	39.755
M11860	39.755
M32852	39.755
M2615	39.755
M2616	39.755
M13029	39.755
M13572	39.755
M3566	39.755
M8021	39.755
M8022	39.755
M9133	39.755
M9134	39.755
M4483	39.755
M2783	39.755
M13428	39.755
M4503	39.755
M449	39.755
M11907	39.755
M11906	39.755
M17396	39.755
M16511	39.755
M19550	39.755
M19549	39.755
M3988	39.755
M10526	39.755
M20344	39.755
M16342	39.755
M20500	39.755
M17381	39.755
M17382	39.755
M1613	39.755
M17951	39.755
M4776	39.755
M6767	39.755
M6766	39.755
M6765	39.755
M24524	39.755
M10005	39.755
M8943	39.755
M17102	39.755
M11175	39.755
M27227	39.755
M27228	39.755
M27226	39.755
M28303	39.755
M28305	39.755
M28304	39.755
M32077	39.755
M15787	39.755
M15789	39.755
M15788	39.755
M15786	39.755
M23061	39.755
M987	39.755
M986	39.755
M988	39.755
M989	39.755
M5207	39.755
M5208	39.755
M5209	39.755
M17793	39.755
M17792	39.755
M17794	39.755
M6454	39.755
M6455	39.755
M32076	39.755
M23618	39.755
M2030	39.755
M2031	39.755
M2029	39.755
M3770	39.755
M23044	39.755
M34182	40.053
M3014	40.053
M3015	40.053
M18091	40.053
M18092	40.053
M10114	40.053
M10115	40.053
M4542	40.053
M1848	40.053
M34370	40.053
M2871	40.053
M24296	40.053
M23987	40.053
M22735	40.053
M22258	40.053
M24272	40.053
M13058	40.053
M13059	40.053
M22444	40.053
M22751	40.053
M22752	40.053
M24098	40.053
M14675	40.053
M16706	40.053
M3856	40.053
M6603	40.053
M11325	40.053
M452	40.053
M17882	40.053
M17883	40.053
M22894	40.053
M15368	40.053
M3351	40.053
M3352	40.053
M3350	40.053
M977	40.053
M11882	40.053
M13845	40.053
M44	40.053
M23225	40.648
M13350	40.648
M13351	40.648
M22714	40.946
M9285	40.946
M9286	40.946
M2472	40.946
M7616	40.946
M17119	41.541
M17118	41.541
M33164	42.136
M33165	42.136
M29925	42.136
M29927	42.136
M29924	42.136
M29926	42.136
M28406	42.136
M28405	42.136
M28407	42.136
M28408	42.136
M29037	42.136
M29034	42.136
M29035	42.136
M29036	42.136
M3883	42.136
M12779	42.136
M3085	42.434
M29618	42.434
M29619	42.434
M29620	42.434
M29621	42.434
M27753	42.434
M27755	42.434
M27754	42.434
M19644	42.732
M29008	42.732
M29010	42.732
M29011	42.732
M29009	42.732
M29304	42.732
M29303	42.732
M29302	42.732
M29614	42.732
M29616	42.732
M29617	42.732
M29615	42.732
M29369	42.732
M29368	42.732
M29370	42.732
M20446	42.732
M8291	43.029
M8292	43.029
M8293	43.624
M18684	43.624
M18683	43.922
M18105	43.922
M18104	43.922
M21468	43.922
M33129	43.922
M34376	44.517
M32001	44.517
M18143	44.517
M13070	44.815
M33171	44.815
M12376	44.815
M2496	44.815
M12940	44.815
M2474	44.815
M2475	44.815
M2473	44.815
M1388	44.815
M1387	44.815
M6063	44.815
M6062	44.815
M990	44.815
M991	44.815
M18039	44.815
M5896	44.815
M12808	44.815
M15656	44.815
M15657	44.815
M30289	44.815
M8144	44.815
M31750	44.815
M11416	44.815
M32841	44.815
M15944	44.815
M13914	44.815
M614	44.815
M15219	44.815
M15220	44.815
M15221	44.815
M15418	44.815
M12524	44.815
M6305	44.815
M6306	44.815
M21344	44.815
M31597	44.815
M15427	44.815
M15428	44.815
M26027	44.815
M2198	44.815
M18646	44.815
M969	44.815
M6881	44.815
M6882	44.815
M21492	44.815
M32278	44.815
M21752	44.815
M4975	44.815
M6141	44.815
M18303	44.815
M6268	44.815
M28435	44.815
M28433	44.815
M28434	44.815
M33092	44.815
M26977	44.815
M12568	44.815
M12569	44.815
M19896	44.815
M8736	44.815
M4004	44.815
M33229	44.815
M3145	44.815
M21573	44.815
M13913	44.815
M74	44.815
M15759	44.815
M20850	44.815
M28011	44.815
M28012	44.815
M28013	44.815
M9479	44.815
M27790	44.815
M27791	44.815
M27792	44.815
M18006	44.815
M18007	44.815
M1287	44.815
M11009	44.815
M11008	44.815
M19786	44.815
M3611	44.815
M8020	44.815
M29883	44.815
M16874	44.815
M11176	44.815
M4749	44.815
M5799	44.815
M5800	44.815
M5801	44.815
M5802	44.815
M9619	44.815
M21323	44.815
M5750	44.815
M21899	44.815
M19961	44.815
M19962	44.815
M7527	44.815
M19611	44.815
M20835	44.815
M11178	44.815
M11177	44.815
M18291	44.815
M6	44.815
M31860	44.815
M31859	44.815
M7658	44.815
M24449	44.815
M24450	44.815
M9971	44.815
M970	44.815
M968	44.815
M16026	44.815
M16601	44.815
M893	44.815
M894	44.815
M895	44.815
M896	44.815
M32253	44.815
M32254	44.815
M15695	44.815
M11877	44.815
M9102	44.815
M7665	44.815
M7664	44.815
M6557	44.815
M13504	44.815
M11320	44.815
M17490	44.815
M13462	44.815
M4861	44.815
M1709	44.815
M30612	44.815
M2747	44.815
M8066	44.815
M12097	44.815
M15135	44.815
M27570	44.815
M11417	44.815
M8065	44.815
M3586	44.815
M15623	44.815
M15624	44.815
M3400	44.815
M7241	44.815
M7240	44.815
M410	44.815
M409	44.815
M1336	44.815
M1337	44.815
M1335	44.815
M23513	44.815
M23532	44.815
M23533	44.815
M23531	44.815
M26433	44.815
M26434	44.815
M26435	44.815
M28121	44.815
M28122	44.815
M7974	44.815
M10151	44.815
M10152	44.815
M16613	44.815
M11810	44.815
M11809	45.113
M33709	45.113
M7993	45.113
M5512	45.113
M1389	45.113
M23512	45.113
M16488	45.113
M16487	45.113
M12506	45.113
M28601	45.113
M28600	45.113
M28602	46.959
M13381	46.959
M19255	46.959
M30699	46.959
M12742	47.256
M2892	47.256
M6492	47.256
M2179	47.554
M7392	47.554
M31780	47.554
M9186	48.149
M7901	48.149
M7530	48.744
M7531	48.744
M18682	48.744
M16159	49.34
M11830	49.34
M2278	49.34
M6139	49.34
M18277	49.34
M18276	49.34
M16383	49.34
M13661	49.34
M23859	49.34
M10037	49.34
M14652	49.34
M23477	49.34
M33001	49.34
M18957	49.34
M18958	49.34
M14470	49.34
M16745	49.34
M8953	49.34
M3594	49.34
M13594	49.34
M18791	49.34
M14164	49.637
M15377	49.637
M18430	49.637
M18431	49.637
M15758	49.637
M7458	49.637
M18511	49.637
M34282	49.637
M22904	49.637
M20324	49.637
M20325	49.637
M20323	49.637
M17340	49.637
M20282	49.935
M11902	49.935
M5178	50.53
M1329	50.53
M4099	50.828
M10131	50.828
M17531	50.828
M14596	50.828
M4408	50.828
M2856	50.828
M5489	50.828
M2801	51.721
M811	51.721
M810	51.721
M3012	52.316
M3011	52.316
M19268	52.614
M3226	52.614
M3227	52.614
M8060	52.614
M8061	52.614
M9955	52.614
M2785	52.614
M10460	52.614
M14084	52.614
M1776	52.614
M9261	52.614
M9262	52.614
M10600	52.614
M10601	52.614
M17592	52.614
M15606	52.614
M21175	52.614
M21177	52.911
M21176	52.911
M2583	53.209
M2584	53.209
M11483	53.209
M23188	53.209
M12032	53.209
M12033	53.804
M22409	53.804
M22406	53.804
M22408	53.804
M22405	53.804
M22407	53.804
M15408	53.804
M15409	53.804
M20165	53.804
M3228	53.804
M12487	53.804
M2786	53.804
M13499	54.102
M23736	54.102
M23738	54.102
M23737	54.102
M15071	54.102
M15072	54.102
M21634	54.102
M21633	54.697
M21635	54.697
M18728	54.697
M5698	54.995
M8213	54.995
M29764	54.995
M28786	54.995
M26982	54.995
M26984	54.995
M25659	54.995
M13603	54.995
M27042	54.995
M26983	54.995
M29916	54.995
M13604	54.995
M8212	54.995
M8211	54.995
M5699	54.995
M15092	54.995
M9956	54.995
M28959	54.995
M28960	54.995
M19534	54.995
M10887	54.995
M8210	55.292
M1950	55.292
M23880	55.292
M15308	55.292
M15309	55.292
M15307	55.292
M2195	55.292
M1700	55.292
M21255	55.292
M21253	55.292
M21254	55.292
M4731	55.292
M7284	55.292
M425	55.292
M13056	55.292
M6802	55.292
M15597	55.292
M17235	55.292
M17236	55.292
M9427	55.292
M19983	55.292
M19984	55.292
M18125	55.292
M15875	55.292
M15876	55.292
M6359	55.292
M6360	55.292
M19787	55.292
M12079	55.292
M12080	55.292
M710	55.292
M1450	55.292
M17234	55.292
M16143	55.292
M16144	55.292
M20844	55.292
M21105	55.292
M16312	55.292
M16314	55.292
M16310	55.292
M16311	55.292
M16313	55.292
M11962	55.292
M8725	55.292
M1659	55.292
M9456	55.292
M9455	55.292
M20156	55.292
M21258	55.292
M2748	55.292
M12312	55.292
M13055	55.292
M13054	55.292
M13053	55.292
M20415	55.292
M9194	55.292
M9193	55.292
M2220	55.292
M2221	55.292
M18572	55.292
M18573	55.292
M8845	55.292
M8846	55.292
M14170	55.292
M17981	55.292
M17982	55.292
M12877	55.292
M19739	55.292
M19740	55.292
M14850	55.292
M7994	55.292
M13459	55.292
M13458	55.292
M15738	55.292
M15737	55.292
M20367	55.292
M18690	55.292
M16484	55.292
M12960	55.292
M4762	55.292
M4763	55.292
M26510	55.292
M26511	55.292
M12787	55.292
M12786	55.292
M12959	55.292
M4766	55.292
M12578	55.292
M12579	55.292
M12580	55.292
M9129	55.292
M6742	55.292
M27041	55.292
M10888	55.888
M11722	55.888
M8870	55.888
M11815	55.888
M18893	55.888
M18892	55.888
M26801	55.888
M21110	55.888
M6365	55.888
M522	55.888
M13113	55.888
M13112	55.888
M13689	55.888
M3294	55.888
M12265	55.888
M27454	55.888
M1860	55.888
M1859	55.888
M12103	55.888
M30530	55.888
M17494	55.888
M17492	55.888
M17493	55.888
M17496	55.888
M17495	55.888
M5956	55.888
M5957	55.888
M12078	55.888
M17704	56.483
M17705	56.483
M17706	57.733
M7322	57.733
M14145	58.328
M14144	58.328
M14143	58.328
M14142	58.328
M7892	59.221
M5005	59.221
M5006	59.221
M24159	59.519
M24158	59.519
M20496	59.519
M20497	59.519
M20499	59.519
M20498	59.817
M17573	59.817
M17574	59.817
M17575	59.817
M32153	59.817
M998	60.114
M10438	60.114
M10439	60.114
M10440	60.114
M2582	60.114
M2580	60.709
M2581	60.709
M25895	60.709
M25894	60.709
M25893	61.007
M25892	61.007
M19638	61.007
M19637	61.007
M590	61.007
M591	61.007
M592	61.007
M5674	61.007
M5673	61.007
M7471	61.007
M7472	61.9
M6955	61.9
M10165	61.9
M10166	61.9
M10167	62.198
M10168	62.198
M13605	62.198
M9457	62.198
M9458	62.198
M9459	62.198
M5672	62.198
M10163	62.198
M10164	62.198
M32522	62.198
M32524	62.198
M32525	62.495
M32523	62.495
M530	62.495
M535	62.495
M536	62.495
M534	62.495
M531	62.495
M532	62.793
M533	62.793
M1660	62.793
M1661	62.793
M1662	62.793
M1663	62.793
M33126	62.793
M33128	63.984
M33127	63.984
M3930	64.281
M3931	64.281
M3932	65.472
M3933	65.472
M3092	68.773
M1451	68.773
M1452	69.07
M26453	69.07
M26450	69.07
M26452	69.368
M26451	69.368
M30063	69.368
M30064	69.368
M30065	69.368
M10133	70.618
M21134	70.618
M21135	70.916
M10356	70.916
M7057	71.213
M7058	71.213
M7059	71.213
M24846	71.213
M19767	71.511
M3093	71.511
M5727	72.404
M28141	72.404
M28177	74.25
M3587	74.25
M5439	76.096
M27702	76.096
M3989	76.691
M21591	76.691
M5720	77.584
M3461	77.584
M1863	77.584
M1864	77.584
M30710	77.584
M19575	77.584
M13274	77.584
M13273	77.584
M392	77.584
M4487	77.584
M20082	77.584
M20083	77.882
M31851	77.882
M22984	77.882
M28140	77.882
M28143	77.882
M28142	77.882
M19925	77.882
M19926	77.882
M523	77.882
M22572	77.882
M13457	77.882
M14552	77.882
M416	77.882
M2434	78.775
M2435	78.775
M3695	78.775
M28153	78.775
M28152	78.775
M28154	78.775
M13887	78.775
M890	78.775
M14780	78.775
M14779	78.775
M16099	78.775
M16100	79.37
M12439	79.37
M27398	79.37
M27399	79.37
M27400	79.965
M27401	79.965
M10564	80.858
M10566	80.858
M10565	81.156
M15752	81.156
M18066	81.751
M158	81.751
M157	81.751
M5510	82.049
M5511	82.049
M7359	82.049
M16616	83.597
M28891	83.597
M28890	83.597
M28889	83.597
M2248	83.597
M2249	83.597
M20935	83.597
M10036	83.597
M8471	83.597
M31447	83.895
M1362	83.895
M18741	83.895
M11663	84.847
M11664	84.847
M32530	84.847
M11097	84.847

## Sheet: LG6
SNP code in LG6	Genetic distance（cM）
M19538	0
M19537	0
M17171	0
M2718	0
M19322	0
M21184	0
M21381	0
M2716	0
M2717	0
M7079	0
M3334	0
M12218	2.502
M4686	2.502
M4687	2.502
M89	2.928
M12475	2.928
M12318	2.928
M17293	2.928
M3624	4.476
M3623	4.476
M26312	5.071
M26310	5.071
M2171	5.071
M24410	6.024
M4878	6.024
M20343	6.024
M20342	6.024
M619	6.619
M19160	6.619
M4452	6.619
M15877	6.619
M31839	6.917
M15038	6.917
M23955	7.214
M2517	7.214
M14436	7.81
M15535	7.81
M855	7.81
M16123	7.81
M19945	10.013
M19946	10.013
M31906	11.332
M8950	11.332
M15431	11.928
M29324	11.928
M29326	11.928
M29325	11.928
M29323	11.928
M17334	12.225
M17332	12.225
M4810	12.225
M9106	12.523
M1923	12.523
M18011	12.523
M5300	12.523
M5301	12.523
M10832	12.523
M11832	12.523
M6533	12.523
M12561	12.523
M19332	14.071
M19331	14.071
M912	14.071
M11094	14.666
M18561	14.666
M18562	14.666
M18563	14.666
M18564	14.666
M14255	14.666
M6900	14.666
M10135	16.512
M3482	16.512
M4133	17.465
M4545	17.465
M4544	18.715
M6218	18.715
M14824	19.31
M17337	19.31
M11269	21.514
M18520	21.514
M21873	22.467
M3528	22.467
M3529	22.764
M11273	22.764
M7423	23.359
M3233	23.359
M9948	23.657
M17410	23.657
M13228	24.252
M16639	24.252
M16640	25.145
M21245	25.145
M21401	26.991
M9646	26.991
M15849	27.587
M13157	27.587
M29332	27.587
M4717	28.48
M4718	28.48
M2412	28.777
M18161	28.777
M17095	29.075
M21131	29.075
M5866	29.67
M9083	29.67
M20650	29.67
M4071	29.968
M27621	29.968
M23733	30.265
M9289	30.265
M20215	30.265
M20214	30.265
M8660	30.265
M8661	30.265
M13293	30.265
M13294	30.265
M4530	30.265
M4532	30.265
M4531	30.265
M4529	30.265
M7015	30.265
M7016	30.265
M7013	30.563
M7014	30.563
M19034	30.563
M19035	30.563
M19036	30.563
M6596	30.563
M6597	30.563
M1839	30.563
M6285	30.563
M6286	30.563
M9126	30.563
M2314	30.563
M2315	30.563
M8142	30.563
M14542	30.563
M2413	30.563
M3387	30.563
M6338	30.563
M17482	30.563
M17481	30.563
M11064	30.563
M17845	30.563
M17846	30.563
M17844	30.563
M30381	30.563
M30382	30.563
M21817	30.563
M6630	30.563
M19170	30.563
M26285	30.563
M3388	30.563
M13701	30.563
M18111	30.563
M18112	30.563
M18113	30.563
M23792	30.861
M23794	30.861
M15227	30.861
M10557	30.861
M3562	31.754
M14257	31.754
M27932	31.754
M27931	31.754
M27930	31.754
M3144	32.051
M3140	32.051
M3141	32.051
M3142	32.349
M3143	32.349
M29861	32.349
M28764	32.349
M28763	32.646
M29862	32.646
M6904	34.919
M6905	34.919
M32636	36.765
M32637	36.765
M16809	38.611
M16810	38.611
M15228	38.611
M10019	38.611
M4807	38.611
M4808	39.206
M15891	39.206
M2723	39.206
M2724	40.457
M5012	40.457
M18419	40.457
M3814	40.763
M3815	40.763
M26623	40.763
M32965	40.763
M32673	40.763
M18883	40.763
M10018	40.763
M26621	40.763
M26622	40.763
M10020	40.763
M23401	41.061
M11683	41.061
M11684	41.359
M2457	41.359
M18863	42.609
M18862	42.609
M7569	43.502
M18884	43.502
M4170	44.395
M4169	44.395
M15554	44.395
M15553	44.395
M3971	44.395
M20541	44.693
M16697	44.693
M16698	44.693
M5931	44.693
M23673	44.693
M17780	44.693
M30625	44.693
M18491	44.693
M16778	44.693
M15924	44.693
M18196	44.693
M18197	44.693
M458	44.693
M30563	44.693
M5749	44.693
M5748	44.693
M16181	44.693
M16182	44.693
M18960	44.693
M18959	45.288
M12485	45.288
M14124	45.288
M12409	45.288
M12408	45.883
M12410	45.883
M5544	45.883
M5545	45.883
M5546	45.883
M9644	45.883
M9643	46.181
M30532	46.181
M30531	46.181
M11093	46.776
M18956	46.776
M17035	46.776
M4109	46.776
M4108	46.776
M11972	46.776
M20086	46.776
M20085	46.776
M9627	46.776
M14644	46.776
M12212	46.776
M3454	46.776
M2996	46.776
M2997	46.776
M13676	47.074
M18404	47.074
M1466	47.074
M16479	47.074
M16246	47.074
M6036	47.074
M10082	47.074
M10083	47.074
M10084	47.074
M6037	47.074
M19164	47.371
M17958	47.371
M10317	47.371
M18509	47.371
M15443	47.966
M32978	47.966
M32976	49.157
M32977	49.157
M4812	49.157
M13175	51.003
M13174	51.003
M13176	51.003
M10297	51.301
M10299	51.301
M10298	51.301
M10300	51.301
M11974	51.301
M11976	51.301
M11973	51.598
M11975	51.598
M4660	52.194
M4661	52.194
M15411	53.087
M15414	53.087
M15412	53.087
M15413	53.512
M15410	53.512
M20804	53.512
M20805	53.512
M719	53.81
M718	53.81
M717	53.81
M720	55.001
M4659	55.001
M18437	55.001
M7120	55.001
M14823	55.001
M2230	55.001
M2231	55.001
M17984	55.001
M20185	55.001
M6985	55.298
M3629	55.298
M33509	55.298
M1331	55.596
M1332	55.596
M1333	55.894
M3969	55.894
M3968	55.894
M3970	56.191
M3967	56.191
M7158	56.191
M7160	56.191
M7159	56.191
M3668	56.191
M3669	56.191
M3664	56.191
M3665	56.191
M3666	56.191
M3667	56.191
M7587	56.489
M2904	56.489
M31255	57.382
M31256	57.382
M31257	57.382
M20327	57.382
M20326	57.382
M20328	57.382
M20329	57.382
M12663	57.382
M12664	57.382
M12665	57.382
M19004	57.382
M19005	57.382
M19002	57.382
M19003	57.382
M7339	57.382
M7340	57.382
M7341	57.382
M6246	57.382
M6248	57.382
M7490	57.977
M7488	57.977
M7489	57.977
M12036	57.977
M12037	57.977
M12038	59.168
M14490	59.168
M32780	59.168
M32781	59.168
M7486	60.061
M7487	60.061
M7491	60.358
M24238	60.358
M30538	60.358
M30537	60.358
M2316	60.358
M2317	60.358
M2318	60.358
M23406	60.358
M20188	60.656
M8351	60.656
M10312	61.549
M4376	61.549
M4377	61.549
M10169	61.549
M10170	61.847
M10171	61.847
M10992	61.847
M10991	61.847
M5634	61.847
M5635	61.847
M5636	61.847
M17768	62.144
M29791	62.144
M12039	62.74
M4801	62.74
M13371	62.74
M13372	62.74
M394	62.74
M6151	62.74
M3470	62.74
M9119	63.037
M9120	63.037
M13167	63.037
M20569	63.037
M31330	63.037
M31331	63.037
M11720	63.037
M11721	63.037
M6238	63.037
M6239	63.037
M28632	63.037
M2511	63.037
M2512	63.037
M13627	63.335
M16009	63.335
M27624	63.335
M738	63.335
M23992	63.335
M24029	63.335
M24031	63.335
M24032	63.335
M24030	63.335
M23817	63.335
M23407	63.335
M22053	63.335
M22484	63.335
M22485	63.335
M6064	63.335
M20956	63.335
M29656	63.335
M29657	63.335
M5102	63.632
M5101	63.632
M11732	63.632
M11733	63.632
M11734	63.632
M10228	63.93
M23975	63.93
M4223	63.93
M6779	63.93
M6781	63.93
M15300	63.93
M15301	63.93
M18247	63.93
M18246	63.93
M23506	63.93
M23505	63.93
M9122	64.228
M2684	64.228
M16200	64.228
M19819	64.228
M19820	64.228
M28344	64.228
M5220	64.228
M5221	64.228
M19120	64.525
M19121	64.525
M7036	64.823
M23247	64.823
M1912	64.823
M1913	64.823
M8594	64.823
M22859	65.12
M22860	65.12
M22858	65.12
M15766	65.12
M15767	65.12
M11055	65.12
M11054	65.12
M20961	65.12
M20960	65.12
M1524	65.12
M1525	65.12
M33950	65.12
M33949	65.12
M33948	65.12
M22531	65.12
M22529	65.12
M22530	65.12
M22739	65.12
M22740	65.12
M22741	65.12
M22766	65.12
M439	65.12
M13508	65.12
M13507	65.12
M15004	65.12
M5115	65.12
M10956	65.12
M10957	65.12
M31253	65.12
M15194	65.12
M15192	65.12
M29234	65.12
M19519	65.12
M19518	65.12
M31038	65.12
M8564	65.418
M30212	65.418
M16814	65.418
M20656	65.418
M20657	65.418
M20655	65.418
M33548	65.418
M6661	65.418
M27578	65.418
M27579	65.418
M32296	65.418
M32297	65.418
M18554	65.418
M17931	65.418
M17930	65.418
M19083	65.418
M19084	65.418
M11162	65.418
M22402	65.418
M22403	65.418
M22404	65.418
M7055	65.418
M7056	65.418
M7053	65.418
M7051	65.418
M7052	65.716
M7054	65.716
M20959	65.716
M11655	65.716
M11654	65.716
M23875	65.716
M23876	65.716
M23877	66.013
M23347	66.013
M20182	66.311
M1621	66.311
M1622	66.311
M3441	66.906
M1263	66.906
M9109	66.906
M9108	66.906
M9110	67.502
M9111	67.502
M15204	67.502
M15205	68.097
M22056	68.097
M22057	68.097
M14849	68.097
M14716	68.394
M1616	68.394
M7338	68.394
M5230	68.692
M5231	68.692
M702	68.692
M33226	68.99
M15853	68.99
M7285	68.99
M10855	68.99
M30356	68.99
M30357	68.99
M5348	68.99
M5349	68.99
M5347	68.99
M5346	68.99
M15749	68.99
M19726	68.99
M10220	68.99
M4436	68.99
M2492	69.585
M2491	69.585
M5527	69.585
M1546	69.585
M10815	69.585
M10816	69.585
M659	69.585
M21153	69.585
M12929	69.585
M9553	69.585
M3939	69.585
M3940	69.585
M14264	69.585
M14263	69.585
M15155	69.585
M30130	69.585
M30296	69.585
M3617	69.585
M15156	69.585
M9834	69.585
M9835	69.585
M16438	69.585
M10046	69.585
M10045	69.585
M12000	69.585
M21399	69.585
M9630	69.585
M13882	69.585
M16637	69.585
M16636	69.585
M13881	69.585
M3670	69.585
M11763	69.585
M6319	69.585
M4299	69.585
M4931	69.585
M30526	69.585
M30527	69.585
M5310	69.585
M9858	69.585
M2938	69.585
M12760	69.585
M16866	69.585
M17326	69.585
M17325	69.585
M5861	69.883
M5860	69.883
M7427	69.883
M3689	69.883
M11542	69.883
M11543	69.883
M8135	69.883
M13615	69.883
M13616	69.883
M2490	70.18
M11797	70.18
M20505	70.18
M7165	70.18
M13920	70.18
M13921	70.18
M11948	70.18
M11949	70.18
M12661	70.18
M12662	70.18
M10993	70.18
M12880	70.478
M10853	70.478
M10854	70.775
M5938	70.775
M5137	71.371
M5136	71.371
M14125	71.371
M14126	71.966
M9216	71.966
M804	72.264
M7969	72.264
M15065	72.561
M3831	72.561
M819	72.859
M21715	72.859
M28659	72.859
M6926	72.859
M407	72.859
M3109	72.859
M3110	72.859
M9144	72.859
M9143	72.859
M2311	72.859
M15293	72.859
M16750	72.859
M16751	72.859
M16752	72.859
M10453	72.859
M10451	72.859
M22262	74.407
M22263	74.407
M10452	75.3
M17091	75.3
M19371	76.193
M13534	76.193
M13533	76.193
M17836	76.193
M7186	76.193
M7187	76.193
M13236	76.193
M4093	76.193
M31550	76.193
M31551	76.193
M31549	76.193
M31798	76.193
M31799	76.193
M31797	76.193
M20493	76.193
M20494	76.193
M20495	76.193
M7949	76.193
M7945	76.193
M7946	76.193
M7948	76.193
M7947	76.193
M7951	76.193
M7950	76.193
M13197	76.193
M17629	76.193
M12213	76.193
M16830	76.193
M5882	76.193
M13919	76.193
M1811	76.788
M11003	76.788
M11004	76.788
M20660	76.788
M20661	76.788
M20662	76.788
M2482	76.788
M1785	76.788
M1786	76.788
M29865	76.788
M15174	76.788
M2192	76.788
M2191	76.788
M3781	76.788
M3780	76.788
M13628	76.788
M8	76.788
M7	76.788
M13498	76.788
M9269	76.788
M9268	76.788
M5063	76.788
M20501	76.788
M20502	76.788
M24517	76.788
M22759	76.788
M10759	76.788
M10760	76.788
M10758	76.788
M13646	76.788
M13647	76.788
M9188	76.788
M11554	76.788
M32772	76.788
M32773	76.788
M28117	76.788
M17799	76.788
M5243	76.788
M5244	76.788
M5242	76.788
M15055	76.788
M33230	76.788
M9189	76.788
M9190	76.788
M1153	76.788
M11553	76.788
M11555	76.788
M25114	76.788
M17754	76.788
M6674	76.788
M28295	77.681
M28296	77.681
M28779	77.979
M10040	77.979
M2050	78.276
M2051	78.276
M2048	78.276
M19216	78.574
M11705	78.574
M16317	78.574
M16318	78.574
M16320	78.574
M17149	78.574
M4700	78.574
M4702	78.574
M4703	78.574
M4701	78.574
M2049	78.872
M11799	78.872
M11798	78.872
M11800	78.872
M1543	78.872
M1544	78.872
M1545	78.872
M3423	78.872
M3424	78.872
M3425	78.872
M3422	78.872
M14732	78.872
M14733	78.872
M14734	78.872
M14735	78.872
M14727	78.872
M14724	78.872
M12214	78.872
M18050	78.872
M18051	78.872
M18053	78.872
M14410	78.872
M14409	78.872
M19217	78.872
M19218	78.872
M14645	79.467
M14646	79.467
M9829	79.467
M9830	79.467
M2401	79.467
M2402	79.467
M6381	79.467
M14150	81.313
M19493	81.313
M19494	81.313
M16779	81.313
M16780	81.313
M16781	81.313
M12979	81.313
M12980	81.313
M12978	81.313
M5605	81.313
M5607	81.313
M5606	81.313
M13298	81.313
M13299	81.908
M13300	81.908
M13559	82.503
M13560	82.503
M13561	82.503
M135	82.503
M136	82.503
M137	82.503
M11278	82.503
M11279	82.503
M11280	82.503
M11277	82.801
M16149	82.801
M16150	82.801
M11936	82.801
M11937	82.801
M11938	82.801
M11939	82.801
M20490	83.099
M20491	83.099
M20492	83.099
M16397	83.099
M16398	83.099
M16399	83.099
M16400	83.099
M22264	84.289
M23712	84.289
M909	84.289
M910	84.289
M908	84.289
M21884	84.289
M16166	84.289
M16167	84.289
M2657	84.289
M2659	84.289
M2660	84.289
M2661	84.289
M14181	84.289
M8992	84.289
M18910	84.289
M18909	85.182
M18908	85.182
M1154	85.182
M1156	85.182
M1157	85.182
M1155	85.182
M3832	85.182
M3833	85.48
M3834	85.48
M16524	85.48
M16525	85.48
M16522	85.48
M16523	85.48
M3758	85.48
M3759	85.48
M3757	85.48
M3760	85.48
M9177	85.48
M9179	85.48
M9178	85.778
M8572	85.778
M571	85.778
M572	85.778
M570	85.778
M32417	85.778
M32418	85.778
M32416	85.778
M32419	85.778
M32420	85.778
M20532	85.778
M20533	85.778
M20534	86.075
M20197	86.075
M20196	86.075
M20199	86.075
M20198	86.075
M10905	86.075
M10906	86.075
M16176	86.075
M16177	86.075
M16178	86.075
M3353	86.075
M3355	86.075
M3354	86.075
M6047	86.075
M6048	86.075
M6049	86.075
M17662	86.075
M17663	86.075
M17660	86.075
M17661	86.075
M16004	86.373
M16005	86.373
M16006	86.373
M14289	86.373
M14291	86.373
M14288	86.373
M14290	86.373
M32747	87.861
M32748	87.861
M32749	87.861
M1771	88.159
M1772	88.159
M1773	88.159
M24388	88.159
M24387	88.159
M24389	88.159
M3808	88.159
M3807	88.159
M3809	88.159
M3810	88.159
M22627	88.159
M7988	88.457
M3048	88.457
M3051	88.457
M3050	88.457
M3049	88.754
M12571	88.754
M12570	88.754
M10904	88.754
M3805	88.754
M3804	88.754
M3803	88.754
M5390	88.754
M5391	88.754
M5389	88.754
M79	88.754
M78	88.754
M80	88.754
M12988	88.754
M12990	88.754
M12989	88.754
M16001	89.052
M16002	89.052
M16003	89.052
M9797	89.052
M9796	89.052
M9798	89.052
M9799	89.052
M23997	89.052
M23998	89.052
M23999	89.052
M20950	89.052
M20951	89.052
M20949	89.052
M6883	89.052
M6884	89.052
M6886	89.052
M6885	89.052
M11611	89.052
M11612	89.052
M11613	89.052
M4014	89.349
M16972	89.349
M16973	89.349
M16974	89.349
M4814	89.349
M4815	89.349
M4816	89.349
M4817	89.349
M10699	89.945
M10698	89.945
M10700	89.945
M16897	90.242
M13195	90.242
M734	90.242
M21886	90.838
M21887	90.838
M21542	90.838
M21152	91.731
M21154	91.731
M18906	91.731
M26976	93.279
M6194	93.279
M6192	93.279
M6193	93.279
M29814	93.279
M19166	93.576
M19167	93.576
M29283	93.576
M29284	93.576
M29285	93.576
M18152	93.874
M19614	93.874
M19613	93.874
M27234	93.874
M29371	93.874
M28506	93.874
M28507	93.874
M33797	93.874
M33486	93.874
M33488	93.874
M33489	93.874
M19165	93.874
M10870	94.767
M31765	94.767
M18907	95.66
M3755	95.66
M3756	95.66
M19364	95.66
M5795	95.66
M5796	95.66
M19394	95.66
M19395	95.66
M4563	95.66
M4562	95.66
M18596	95.66
M18595	95.66
M9779	95.66
M7330	95.66
M13107	95.66
M27203	95.66
M20888	95.66
M12543	95.66
M26134	95.66
M26135	95.66
M30568	95.66
M20110	95.66
M20111	95.66
M23248	95.66
M23249	95.66
M24128	95.66
M16077	95.66
M16076	95.66
M28985	95.66
M28986	95.66
M10871	95.66
M10868	95.66
M10869	95.66
M29815	95.66
M34211	95.66
M29947	95.66
M3929	95.66
M13591	95.66
M1098	95.66
M1097	95.66
M9175	95.66
M9176	95.66
M3811	95.66
M695	95.66
M696	95.66
M483	95.66
M482	95.66
M7073	95.66
M19362	95.66
M19363	95.66
M25298	95.66
M27150	95.66
M27073	95.957
M27074	95.957
M15576	95.957
M15577	95.957
M15574	96.255
M15575	96.255
M19631	96.255
M19630	96.255
M8571	96.255
M8707	96.255
M10727	96.255
M10728	96.255
M19612	96.255
M16235	96.255
M16236	96.255
M14273	96.255
M17580	96.255
M15222	96.255
M9165	96.255
M9166	96.255
M9164	96.255
M23566	96.255
M23565	96.255
M30125	96.255
M15258	96.255
M4710	96.255
M4781	96.255
M4782	96.255
M20276	96.255
M9901	96.255
M9902	96.255
M15397	96.255
M14021	96.255
M14022	96.255
M14023	96.255
M14024	96.255
M9903	96.255
M1620	96.255
M16199	96.255
M16319	96.255
M18607	96.255
M15482	96.255
M18597	96.553
M11569	96.553
M11570	96.553
M16769	96.553
M16770	96.553
M16771	96.553
M16772	96.553
M20719	96.553
M20720	96.553
M20718	96.553
M8701	96.553
M8702	96.553
M7039	96.553
M20531	96.553
M20530	96.553
M10907	96.553
M5190	96.553
M5189	96.553
M31967	96.553
M29923	96.553
M6807	96.553
M6806	96.553
M4619	96.553
M4620	96.553
M21493	96.553
M21701	96.553
M1160	96.553
M1161	96.553
M8071	96.553
M32770	96.553
M32768	96.553
M32769	96.553
M8902	96.553
M18114	96.553
M33328	96.553
M21031	96.553
M21032	96.553
M21030	96.553
M3009	96.553
M3010	96.553
M3007	97.148
M3008	97.148
M16536	97.148
M16538	97.148
M16537	97.148
M16535	97.148
M28636	97.148
M6045	97.148
M6046	97.148
M24497	97.148
M24498	97.148
M24500	97.148
M24499	97.148
M2288	97.148
M2289	97.148
M2290	97.148
M2291	97.148
M10852	97.148
M28207	97.148
M18486	97.148
M18485	97.148
M18487	97.148
M18488	97.148
M12054	97.148
M12052	97.148
M12053	97.148
M17115	97.148
M17114	97.148
M17116	97.148
M3475	97.148
M20463	97.148
M20462	97.148
M22532	97.148
M22533	97.148
M9416	97.148
M2234	97.148
M20943	97.148
M20942	97.148
M12987	97.148
M19393	97.148
M8355	97.148
M8354	97.148
M9766	97.148
M9767	97.148
M8805	97.148
M8806	97.148
M9163	97.148
M6382	97.148
M6383	97.148
M12307	97.148
M10536	97.148
M30131	97.148
M29978	97.148
M17665	97.148
M17664	97.148
M11171	97.148
M11172	97.148
M4036	97.148
M4037	97.148
M4729	97.148
M21610	97.446
M7037	97.446
M7038	97.446
M4783	97.446
M16179	97.446
M16180	97.446
M9794	97.446
M9795	97.446
M7505	97.446
M7506	97.446
M14012	97.446
M14013	97.446
M14014	97.446
M12519	97.446
M6561	97.446
M6562	97.446
M6563	97.446
M12518	97.446
M10941	97.446
M742	97.446
M13153	97.446
M13154	97.446
M4564	97.446
M1948	97.446
M1947	97.446
M15680	97.446
M15681	97.446
M26626	97.446
M27058	97.446
M34477	97.446
M27022	97.446
M7328	97.743
M7326	97.743
M7327	97.743
M31177	97.743
M13301	97.743
M32986	97.743
M33487	97.743
M24000	97.743
M24001	97.743
M24002	97.743
M24004	97.743
M24003	97.743
M22738	97.743
M22737	97.743
M15460	97.743
M15459	97.743
M15044	97.743
M15045	97.743
M2264	98.041
M6800	98.041
M11852	98.041
M19772	98.041
M2483	98.041
M10821	98.041
M1964	98.041
M1965	98.041
M31480	98.041
M20948	98.338
M20947	98.338
M11614	98.338
M16888	98.338
M16975	98.338
M16976	98.338
M5095	98.338
M5094	98.338
M5093	98.338
M29734	98.338
M29735	98.338
M16705	98.338
M17579	98.338
M1228	98.338
M1229	98.338
M3612	98.636
M12249	98.636
M6247	98.636
M5562	98.636
M4698	98.636
M4699	98.636
M15314	98.636
M15315	98.636
M11297	98.636
M11298	98.636
M21232	98.636
M9104	98.636
M20319	98.636
M20320	98.636
M20318	98.636
M10205	98.636
M16595	98.636
M6673	98.636
M795	98.636
M794	98.636
M17649	98.636
M4075	98.636
M4076	98.636
M3036	98.934
M3037	98.934
M17295	98.934
M17294	98.934
M14924	98.934
M9167	98.934
M9168	98.934
M9169	98.934
M27601	98.934
M1268	98.934
M1269	98.934
M1267	98.934
M14926	98.934
M14925	98.934
M2793	99.231
M2796	99.231
M2794	99.529
M2795	99.529
M10339	99.827
M23170	99.827
M26714	99.827
M18606	99.827
M11935	99.827
M16164	99.827
M16165	99.827
M18507	100.124
M18508	100.124
M6697	100.124
M6696	100.124
M6694	100.124
M6695	100.124
M11207	100.55
M11208	100.55
M11209	101.8
M11210	101.8
M17877	102.991
M17876	102.991
M33904	102.991
M33906	102.991
M30205	102.991
M30208	102.991
M30206	103.298
M26972	103.298
M23620	103.298
M23619	103.298
M24113	103.595
M24114	103.595

## Sheet: LG7
SNP code in LG7	Genetic distance（cM）
M8546	0
M28213	0
M28215	0
M28212	0
M28214	0
M4196	0
M4195	0
M16649	0
M10149	0
M10150	0.595
M15313	0.595
M22112	0.893
M24008	0.893
M22723	1.191
M1289	1.191
M1288	1.191
M1290	1.488
M747	1.488
M5070	1.488
M5071	1.488
M14696	1.488
M21045	1.488
M7493	1.786
M7492	1.786
M26459	1.786
M26458	1.786
M26461	1.786
M26460	2.093
M32840	2.093
M32839	2.093
M32518	2.093
M27744	2.093
M27742	2.093
M27743	2.39
M27741	2.39
M29349	2.39
M29350	2.39
M26614	2.39
M26612	2.39
M26613	2.39
M13096	2.39
M13094	2.39
M17805	2.39
M21670	2.39
M21669	2.39
M12537	2.39
M12538	2.39
M30458	2.688
M12952	2.688
M12953	2.688
M6337	3.283
M6336	3.283
M6026	3.283
M6027	3.581
M9736	3.581
M13994	4.176
M2513	4.176
M26471	4.176
M26470	6.022
M26472	6.022
M3472	6.617
M21364	6.617
M21365	6.617
M12128	7.57
M12125	7.57
M1036	7.57
M1038	7.867
M1037	7.867
M1040	7.867
M1041	7.867
M14103	8.165
M10080	8.165
M20922	8.463
M22303	8.463
M22304	8.463
M1334	9.415
M14845	9.415
M14844	9.415
M3071	9.415
M3073	10.963
M3072	10.963
M25264	10.963
M20225	10.963
M22550	10.963
M22551	10.963
M29261	11.558
M12748	11.558
M12759	12.154
M21097	12.154
M9419	12.154
M9420	12.154
M20289	12.154
M17540	12.154
M1642	12.154
M9351	12.154
M17689	12.154
M17690	12.154
M16473	12.154
M16474	12.154
M16471	12.154
M16472	12.154
M10261	12.451
M5740	12.451
M21486	12.451
M19330	12.451
M5936	12.451
M5937	12.451
M26356	12.451
M26357	12.451
M26358	12.749
M21240	12.749
M16759	13.344
M16758	13.344
M19297	14.237
M8624	14.237
M20746	14.832
M20747	14.832
M6357	15.428
M2066	15.428
M2067	15.428
M19093	15.428
M19094	16.023
M12029	16.023
M13712	16.023
M13711	16.023
M29122	16.023
M29123	16.023
M29124	16.023
M12306	16.023
M11776	16.023
M11777	16.023
M3961	16.321
M3963	16.321
M18989	16.321
M18987	16.321
M3437	16.321
M434	16.321
M433	16.321
M17622	16.321
M17623	16.321
M11881	16.321
M11880	16.321
M6715	16.321
M32489	16.321
M3955	16.321
M4326	16.321
M4325	16.321
M4327	16.321
M21639	16.321
M32988	16.321
M32987	16.321
M33107	16.321
M4568	16.321
M24649	16.321
M21282	16.321
M6874	16.321
M3708	16.321
M584	16.321
M10093	16.321
M14485	16.618
M6709	16.618
M23490	16.618
M26378	16.618
M15124	16.618
M28319	16.618
M28317	16.618
M28318	16.618
M424	16.618
M423	16.618
M421	17.214
M422	17.214
M15929	17.214
M22922	17.214
M10535	17.214
M10534	17.214
M4131	18.464
M4132	18.464
M29426	18.761
M15912	18.761
M1313	18.761
M21567	18.761
M673	18.761
M14085	18.761
M26377	19.059
M26376	19.059
M17360	19.059
M28311	19.059
M28312	19.059
M28310	19.059
M21790	19.357
M33530	19.357
M10518	19.357
M10014	19.357
M10530	19.357
M19565	20.309
M19564	20.309
M17652	21.857
M4094	21.857
M21289	22.155
M21290	22.155
M11847	22.155
M13759	22.155
M13760	22.155
M2159	22.453
M2158	22.453
M5436	22.453
M26223	22.453
M26224	22.453
M26225	23.048
M31478	23.048
M7150	23.048
M18191	23.345
M14879	23.345
M14878	23.345
M14877	23.345
M32926	23.941
M29022	23.941
M29020	23.941
M29021	23.941
M836	23.941
M835	23.941
M33133	23.941
M6685	24.238
M20673	24.238
M20672	24.238
M20671	24.238
M20675	24.238
M20676	24.238
M32927	24.238
M29019	24.238
M27079	24.238
M27080	24.238
M28007	24.238
M31722	24.238
M6576	24.238
M28015	24.238
M28016	24.238
M28017	24.238
M26802	24.238
M32578	24.238
M20891	24.238
M20892	24.238
M30293	24.238
M1048	24.238
M12405	24.238
M11742	24.238
M18978	24.238
M20765	24.238
M18977	24.536
M32006	24.536
M1019	24.536
M1020	24.536
M16662	24.536
M20713	24.536
M18298	24.536
M18299	24.536
M20137	24.536
M17708	24.536
M10745	24.536
M21604	24.536
M9437	24.536
M1318	24.536
M27016	24.536
M19307	24.536
M3960	24.536
M3962	24.536
M6660	24.536
M29015	24.536
M15815	24.536
M10021	24.536
M7112	24.536
M9942	24.536
M19495	24.536
M32114	24.536
M13917	24.536
M17978	24.536
M14858	24.536
M20432	24.536
M11662	24.536
M5915	24.536
M13035	24.536
M4041	24.536
M4040	24.536
M2908	24.536
M12870	24.536
M27230	24.536
M27229	24.536
M18671	24.536
M2787	24.536
M2788	24.536
M29058	24.536
M29059	24.536
M29060	24.536
M33383	24.536
M33384	24.536
M4638	24.536
M29408	24.536
M29409	24.536
M33359	24.536
M12809	24.536
M11289	24.536
M5218	24.536
M32854	24.536
M4672	24.536
M16818	24.536
M14750	24.536
M14751	24.536
M6023	24.536
M1577	24.536
M1578	24.536
M10641	24.536
M24062	24.536
M11817	24.536
M27172	24.536
M2932	24.536
M2933	24.536
M10415	24.536
M10413	24.536
M10414	24.536
M10416	24.536
M21374	24.536
M19986	24.536
M11100	24.536
M1807	24.536
M6020	24.536
M13947	24.536
M11934	24.536
M4641	24.536
M4642	24.536
M26067	24.536
M20594	24.536
M21109	24.536
M18751	24.536
M18750	24.536
M7474	24.536
M28847	24.536
M15933	24.834
M16494	24.834
M17224	24.834
M34200	24.834
M33121	24.834
M9828	24.834
M6995	24.834
M7238	24.834
M1113	24.834
M31348	24.834
M15317	24.834
M2478	24.834
M2477	24.834
M3106	24.834
M31524	24.834
M5486	24.834
M21191	24.834
M14087	24.834
M10542	24.834
M10543	24.834
M8897	24.834
M5645	24.834
M4171	24.834
M4172	24.834
M10527	24.834
M10528	24.834
M16514	24.834
M7329	24.834
M2670	24.834
M5569	24.834
M5570	24.834
M17474	24.834
M17473	24.834
M11460	24.834
M16370	24.834
M16369	24.834
M318	24.834
M4363	24.834
M15582	24.834
M15583	24.834
M10147	24.834
M10348	24.834
M2489	24.834
M17142	24.834
M539	24.834
M4117	24.834
M4714	24.834
M6482	24.834
M6483	24.834
M23703	24.834
M24909	24.834
M21854	24.834
M23537	24.834
M23536	24.834
M4854	24.834
M2493	24.834
M6308	24.834
M6307	24.834
M19861	24.834
M14960	24.834
M4993	24.834
M16407	24.834
M13735	24.834
M3965	24.834
M31094	24.834
M4976	24.834
M3129	24.834
M12353	24.834
M31416	24.834
M31417	24.834
M17329	24.834
M5459	24.834
M26295	24.834
M26296	24.834
M18459	24.834
M901	24.834
M20782	24.834
M25549	24.834
M29222	24.834
M1918	24.834
M19091	24.834
M19092	24.834
M32710	24.834
M2891	24.834
M17734	24.834
M8405	24.834
M6167	24.834
M32394	24.834
M19215	24.834
M4246	24.834
M8411	24.834
M8412	24.834
M10033	24.834
M26414	24.834
M1615	24.834
M1614	24.834
M15119	24.834
M838	24.834
M31994	24.834
M7231	24.834
M7230	24.834
M19969	24.834
M19970	24.834
M19971	24.834
M19893	24.834
M1065	24.834
M28634	24.834
M28633	24.834
M28635	24.834
M30103	24.834
M30101	24.834
M30102	24.834
M26760	25.429
M26761	25.429
M33053	25.429
M8159	25.429
M31743	25.429
M25321	25.429
M1205	25.429
M17506	25.429
M20885	25.429
M3679	25.429
M26066	25.429
M11850	25.429
M18465	25.429
M10417	25.429
M14408	25.429
M5032	25.429
M9043	25.429
M9044	25.429
M8984	25.429
M8854	25.429
M9000	25.429
M15931	25.429
M15930	25.429
M4219	25.429
M20866	25.429
M32443	25.429
M29455	25.429
M29456	25.429
M20348	25.429
M10351	25.429
M15425	25.429
M16412	25.429
M3829	25.429
M4567	25.429
M31989	25.429
M30104	25.429
M12397	25.429
M32541	25.429
M32994	25.429
M32995	25.429
M6086	25.429
M31822	25.429
M27056	25.429
M7266	25.429
M19902	25.429
M7370	25.429
M5501	25.429
M14403	25.429
M1111	25.429
M9866	25.429
M11571	25.429
M20376	25.429
M20368	25.429
M9375	25.429
M22379	25.429
M22380	25.429
M22378	25.429
M30676	25.429
M30677	25.429
M5166	25.429
M23660	25.429
M23659	25.429
M30118	25.429
M30117	25.429
M10691	25.429
M6344	25.429
M19937	25.429
M12445	25.429
M25880	25.429
M13451	25.429
M22078	25.429
M21421	25.429
M25320	25.429
M678	25.429
M303	25.429
M10617	25.429
M31318	25.429
M7654	25.429
M12215	25.429
M2440	25.429
M1647	25.429
M8735	25.429
M18443	25.429
M25705	25.429
M18388	25.429
M31561	25.429
M31562	25.429
M4459	25.429
M3133	25.429
M12493	25.429
M9042	25.429
M4836	25.429
M1363	25.429
M2654	25.429
M4102	25.429
M13870	25.429
M13871	25.429
M4025	25.429
M18417	25.429
M19461	25.429
M21247	25.429
M20172	25.429
M33117	25.429
M6642	25.429
M34262	25.429
M34261	25.429
M22446	25.726
M29917	25.726
M14754	25.726
M14753	25.726
M30151	25.726
M30152	25.726
M27441	25.726
M10968	25.726
M6033	25.726
M18385	25.726
M30370	25.726
M10305	25.726
M27319	25.726
M27318	25.726
M28151	25.726
M34461	25.726
M11524	25.726
M31293	25.726
M29401	25.726
M29402	25.726
M31504	25.726
M32078	26.322
M29380	26.322
M29381	26.917
M3378	26.917
M4486	26.917
M17434	27.869
M10529	27.869
M29955	28.167
M29956	28.167
M29953	28.167
M29954	28.167
M29553	28.167
M29554	28.762
M29552	28.762
M30486	28.762
M16401	28.762
M5525	28.762
M5222	29.06
M30689	29.06
M26959	29.06
M26958	29.06
M21957	29.358
M21956	29.358
M21958	29.358
M22448	29.655
M22450	29.655
M22447	30.608
M22449	30.608
M18460	30.608
M4401	31.858
M21549	31.858
M22432	31.858
M22433	31.858
M23913	32.156
M23615	32.156
M12986	32.156
M15525	32.453
M8988	32.453
M8989	33.703
M12713	33.703
M12714	33.703
M29710	33.703
M29711	33.703
M29712	33.703
M29879	33.703
M29880	33.703
M29881	33.703
M29882	33.703
M27205	33.703
M27206	33.703
M27207	33.703
M27208	33.703
M12438	33.703
M11328	33.703
M12285	33.703
M12286	33.703
M6778	33.703
M18150	33.703
M18151	33.703
M17369	33.703
M17368	34.01
M11071	34.01
M3661	34.01
M3662	34.01
M3663	34.01
M11964	34.01
M11965	34.01
M11499	34.01
M1895	34.01
M1896	34.01
M8017	34.01
M17639	34.01
M13537	34.01
M13536	34.01
M3440	34.308
M32716	34.308
M22177	35.201
M22178	35.201
M23686	35.796
M19390	35.796
M29662	36.094
M29664	36.094
M22829	36.094
M22830	36.391
M24091	36.391
M24021	36.391
M24022	36.391
M27199	36.987
M27201	36.987
M24345	36.987
M23581	37.582
M29706	37.582
M29705	37.582
M29707	37.582
M22788	37.582
M22789	37.582
M5460	38.177
M907	38.177
M28229	38.475
M29460	38.475
M29461	39.07
M28069	39.07
M28067	39.07
M28068	39.368
M29982	39.368
M7697	39.963
M7698	39.963
M20908	39.963
M6445	40.261
M6446	40.261
M30099	40.856
M30100	40.856
M27511	40.856
M27512	40.856
M27513	40.856
M29522	40.856
M29523	40.856
M29521	40.856
M29524	40.856
M30033	40.856
M30034	40.856
M30035	40.856
M29658	40.856
M29659	40.856
M29660	40.856
M29661	40.856
M9461	40.856
M19510	40.856
M16074	40.856
M9746	40.856
M16075	40.856
M13578	40.856
M3266	40.856
M4157	40.856
M4158	40.856
M342	40.856
M341	40.856
M11853	40.856
M11854	40.856
M15719	40.856
M3544	40.856
M7972	40.856
M1648	40.856
M31778	40.856
M31779	40.856
M10960	40.856
M540	40.856
M20485	40.856
M31571	40.856
M31572	40.856
M2878	41.451
M3373	41.451
M7696	41.451
M9504	41.451
M9505	41.451
M14412	41.451
M19998	41.451
M9356	41.451
M16940	41.451
M5000	41.451
M4156	42.046
M33156	42.046
M33157	42.046
M11083	42.046
M11084	42.046
M18077	42.046
M9357	42.046
M9358	42.046
M4598	42.344
M12899	42.344
M10154	42.344
M10153	42.344
M10155	42.344
M10961	42.344
M3086	42.344
M2388	42.344
M4323	42.344
M18421	42.344
M18420	42.344
M2916	42.344
M19760	42.344
M19762	42.344
M19763	42.344
M19761	42.642
M8434	42.642
M26013	42.939
M26014	42.939
M26015	42.939
M26016	42.939
M24043	42.939
M24042	42.939
M15605	42.939
M2063	42.939
M12601	42.939
M12600	42.939
M14055	42.939
M3568	42.939
M3569	42.939
M16266	42.939
M1877	42.939
M12189	42.939
M10488	42.939
M10487	42.939
M4413	42.939
M4412	42.939
M6149	42.939
M13716	42.939
M13717	42.939
M13718	43.237
M33255	43.237
M28782	43.237
M28783	43.237
M28784	43.237
M29028	43.237
M29029	43.237
M29030	43.237
M29027	43.237
M26096	43.237
M26098	43.237
M26097	43.237
M9240	43.237
M7000	43.237
M6999	43.237
M4318	43.534
M4317	43.534
M18658	43.534
M23352	43.534
M2876	43.534
M2877	43.534
M6656	43.832
M2548	43.832
M2549	43.832
M17903	43.832
M17902	44.13
M773	44.13
M16656	44.13
M16657	44.13
M16658	44.13
M1104	44.13
M1105	44.13
M1106	44.13
M17809	44.427
M17810	44.427
M17811	44.427
M17723	44.427
M9185	44.427
M21303	44.427
M9924	44.427
M6428	44.427
M23110	44.427
M1499	44.427
M18275	44.427
M14197	44.427
M14198	44.427
M4055	44.427
M12514	44.427
M366	44.427
M365	44.427
M1865	44.427
M10266	44.427
M10265	44.427
M30664	44.427
M17808	44.427
M13540	44.427
M13541	44.427
M17807	44.427
M13925	44.427
M971	44.427
M14603	44.427
M12081	44.427
M10456	44.427
M10457	44.427
M20464	44.427
M19661	44.427
M19662	44.427
M2926	44.427
M20177	44.427
M2949	44.427
M15591	44.427
M17403	44.427
M20618	44.427
M20619	44.427
M17404	44.427
M17139	44.427
M30326	44.427
M5994	44.427
M12515	44.427
M12516	44.427
M2438	44.427
M2439	44.427
M4397	44.427
M2093	44.427
M13418	44.427
M5427	44.427
M5426	44.427
M4964	44.427
M16740	44.427
M29215	44.427
M29216	44.427
M29217	44.427
M28353	44.427
M28352	44.427
M28354	44.427
M30535	45.023
M30536	45.023
M2152	45.32
M24076	45.32
M24074	45.32
M24075	45.915
M24073	45.915
M1258	46.808
M1259	46.808
M3335	46.808
M18533	46.808
M18611	47.106
M2921	47.106
M2920	48.356
M5613	48.356
M13778	48.356
M2456	48.356
M13777	48.356
M13779	48.356
M2919	48.356
M1849	48.356
M1850	48.356
M18933	48.356
M17755	48.356
M9393	48.356
M13927	48.356
M3754	48.356
M16534	48.356
M2297	48.356
M21759	48.356
M32566	48.654
M21760	48.654
M20564	48.654
M6808	48.654
M7411	48.952
M9807	48.952
M19629	49.844
M4646	49.844
M772	49.844
M774	49.844
M15351	50.44
M16023	50.44
M18609	50.44
M18608	50.44
M18610	50.44
M24378	50.44
M24379	51.333
M24376	51.333
M24377	51.333
M1521	52.226
M5365	52.226
M4451	53.774
M10681	53.774
M10680	54.667
M1522	54.667
M1523	54.667
M22724	54.667
M14999	55.262
M14998	55.262
M13653	55.262
M13654	55.262
M17079	55.262
M17081	55.262
M17080	55.262
M6604	56.155
M9900	56.155
M7967	56.155
M4319	56.155
M8429	56.155
M8428	56.155
M6717	56.155
M6718	56.155
M6719	56.155
M6720	56.155
M127	56.155
M12216	56.155
M122	56.155
M18073	56.155
M6861	56.155
M25310	56.155
M17767	56.155
M17227	56.155
M215	56.155
M216	56.155
M666	56.155
M2485	56.155
M2484	56.155
M8858	56.155
M8152	56.155
M8153	56.155
M8151	56.155
M2486	56.155
M6983	56.453
M10569	56.453
M2954	59.253
M16646	59.253
M16645	59.848
M12995	59.848
M12996	59.848
M12997	59.848
M17014	60.146
M17015	60.146
M17013	60.146
M17012	60.146
M17873	60.146
M17874	60.869
M5324	60.869
M5327	61.465
M5328	61.465
M19235	61.465
M19236	61.465
M19237	66.181
M19238	66.181
M67	68.027
M68	68.027
M69	68.027
M20723	68.027
M20724	68.027
M20725	68.027
M25356	68.92
M25354	68.92
M25355	69.218
M25357	69.218
M14158	69.515
M14160	69.515
M16408	69.515
M16409	69.515
M16410	69.515
M16411	69.515
M12970	69.515
M12971	69.515
M12972	69.515
M18551	69.515
M18552	70.111
M18550	70.111
M4074	70.408
M4073	70.408
M4072	70.408
M9201	70.408
M9202	70.408
M9203	70.408
M9204	70.408
M17966	70.408
M17967	70.408
M17969	70.408
M17968	70.408
M14616	70.408
M14618	70.408
M14617	70.408
M14159	70.408
M23786	71.301
M23787	71.301
M5656	72.551
M5655	72.551
M19103	72.551
M19104	72.551
M9919	72.551
M15034	72.849
M10446	72.849
M10447	73.444
M3777	73.444
M3776	73.444
M20255	73.444
M24902	73.444
M101	73.444
M3225	73.444
M16598	73.444
M15658	73.742
M18518	73.742
M29628	73.742
M3017	73.742
M3016	73.742
M3101	73.742
M8874	73.742
M13214	73.742
M12973	73.742
M18549	74.337
M26271	74.337
M26270	74.337
M30603	74.337
M27175	74.337
M17026	74.337
M17025	74.337
M14155	74.337
M31901	74.337
M15054	74.337
M27169	74.932
M27170	74.932
M13495	74.932
M19663	74.932
M19664	74.932
M13640	74.932
M17541	75.23
M23246	75.23
M10504	75.23
M7124	75.23
M11748	75.23
M15035	75.23
M9588	75.23
M9589	75.23
M19985	75.23
M4761	75.23
M5849	75.23
M10596	75.23
M14813	77.374
M9984	77.374
M6577	79.876
M27064	79.876
M18692	84.353
M20749	84.353
M20748	84.353
M7859	84.353
M32767	84.353
M26913	84.353
M26912	84.353
M13895	84.353
M13894	84.353
M24598	84.353
M24597	84.353
M22504	84.353
M12715	84.353

## Sheet: LG8
SNP code in LG8	Genetic distance（cM）
M13317	0
M13318	0
M20968	0
M9749	0
M242	0
M243	0
M2130	0
M6834	0
M17827	0
M1942	0
M5643	0.953
M14794	0.953
M5555	1.25
M7017	1.25
M17790	1.25
M8863	2.203
M15916	2.203
M19987	2.203
M17728	3.453
M4960	3.453
M6897	3.453
M6896	3.751
M13730	3.751
M13731	4.048
M20979	4.048
M28961	4.644
M20980	4.644
M8914	4.644
M12326	4.644
M12327	4.644
M19732	4.644
M19733	4.941
M17829	4.941
M12204	4.941
M12336	4.941
M12337	4.941
M31616	4.941
M31617	4.941
M31618	4.941
M5941	5.239
M11512	5.239
M11511	5.239
M8714	5.239
M2688	5.239
M6819	5.239
M6820	5.239
M7532	5.239
M19951	5.239
M19952	5.239
M14229	5.239
M11829	5.239
M7382	5.239
M8166	5.239
M19950	5.239
M8439	5.239
M8438	5.239
M19512	5.239
M19966	5.239
M19967	5.239
M19968	5.239
M10846	5.239
M16252	5.239
M12593	5.239
M10847	5.239
M10848	5.537
M10879	5.537
M20840	5.537
M2592	6.787
M2591	6.787
M23258	6.787
M23260	6.787
M23259	7.68
M9381	7.68
M7076	7.68
M7077	11.736
M7078	11.736
M11791	12.162
M11792	12.162
M11794	12.162
M11793	12.162
M16376	12.162
M16378	12.162
M16377	12.162
M15334	12.162
M15335	12.757
M15333	12.757
M5284	12.757
M5283	12.757
M5286	12.757
M5282	12.757
M13690	12.757
M13691	12.757
M13692	12.757
M824	12.757
M827	12.757
M825	12.757
M826	12.757
M56	12.757
M55	12.757
M57	12.757
M58	12.757
M8555	12.757
M8556	12.757
M8554	12.757
M15485	12.757
M15486	12.757
M15483	12.757
M15484	13.353
M24187	13.353
M23196	15.199
M11225	15.199
M11228	15.199
M20760	15.496
M20761	15.496
M20762	15.794
M20763	15.794
M13374	16.389
M13103	16.389
M13105	16.389
M13104	16.389
M12862	16.389
M442	16.389
M8509	16.389
M791	16.389
M3124	16.389
M11380	16.389
M3402	16.389
M3403	16.389
M13375	16.389
M13373	16.389
M12860	16.389
M12861	16.389
M12074	16.389
M19482	16.389
M7257	16.389
M19289	16.389
M7255	16.389
M7256	16.389
M3125	16.389
M15600	16.389
M3702	16.389
M3703	16.389
M3704	16.687
M3705	16.687
M23002	16.687
M23001	16.687
M1203	16.687
M15244	16.687
M17602	16.984
M17603	16.984
M17600	16.984
M17601	16.984
M17940	16.984
M17941	17.282
M6637	17.282
M16878	17.282
M16879	17.282
M22675	17.282
M5285	17.282
M22098	17.282
M4351	17.282
M2899	17.282
M2900	17.282
M2901	17.282
M8013	17.877
M13725	17.877
M15830	17.877
M15829	18.175
M4437	18.175
M12615	18.175
M12616	18.175
M12914	18.175
M9389	18.175
M14975	18.175
M13699	18.175
M13697	18.175
M13698	18.175
M2169	18.175
M12614	18.175
M13433	18.175
M21146	18.175
M9978	18.175
M9047	18.175
M9046	18.175
M9045	18.175
M16495	18.175
M1696	18.175
M1695	18.175
M21453	18.175
M21454	18.175
M4617	18.175
M4618	18.473
M18797	18.473
M17480	18.473
M11029	18.473
M2321	18.77
M440	18.77
M441	18.77
M6099	18.77
M23375	19.068
M23376	19.068
M9933	19.365
M9932	19.365
M12559	19.663
M12560	19.663
M12319	19.663
M9135	19.663
M20080	20.258
M23988	20.258
M11227	21.151
M11226	21.151
M4590	21.875
M22279	21.875
M25411	21.875
M25410	21.875
M23358	21.875
M5566	21.875
M5567	22.172
M335	22.172
M16948	22.172
M23493	22.172
M3123	22.172
M6548	22.172
M6547	22.172
M22676	22.172
M15961	22.172
M17724	22.172
M4765	22.172
M17564	22.172
M9320	22.172
M11812	22.172
M5240	22.172
M5239	23.065
M17849	23.065
M9765	23.958
M1768	23.958
M8698	24.554
M11645	24.554
M7438	25.804
M6865	25.804
M18651	25.804
M22674	25.804
M2897	26.399
M2898	26.399
M5955	26.697
M5954	26.697
M4644	26.697
M21361	26.697
M6741	26.697
M14688	26.697
M14687	26.697
M14686	26.697
M14685	26.697
M14684	26.697
M245	26.697
M23743	26.697
M20406	26.697
M23929	26.697
M23931	26.697
M23927	26.697
M23930	26.697
M4603	26.697
M19023	26.697
M19021	26.697
M19022	26.697
M19024	26.697
M4794	26.697
M5590	26.697
M2494	26.697
M18583	26.994
M2362	26.994
M18601	26.994
M18602	26.994
M15962	26.994
M12967	26.994
M12968	26.994
M12966	26.994
M19350	26.994
M19668	26.994
M19669	26.994
M6833	26.994
M19490	26.994
M7666	26.994
M7667	26.994
M16729	26.994
M1373	26.994
M11321	26.994
M11322	27.292
M20158	27.292
M1840	27.292
M1841	27.292
M1842	27.292
M1843	27.292
M20290	27.292
M5877	27.292
M16732	27.292
M16733	27.292
M18354	27.292
M18355	27.292
M3455	27.292
M3456	27.292
M3457	27.292
M789	27.292
M788	27.292
M4692	27.292
M21588	27.292
M19910	27.292
M2870	27.292
M1025	27.292
M220	27.292
M19245	27.292
M19244	27.59
M20228	27.59
M13902	27.59
M23419	27.59
M18362	27.59
M19483	27.59
M17641	27.59
M8970	27.59
M8969	28.483
M4649	28.483
M9053	29.375
M20654	29.375
M1974	29.375
M1975	29.375
M1976	29.375
M6115	29.375
M20229	29.375
M20230	29.375
M11876	29.971
M11875	29.971
M9424	29.971
M9425	29.971
M14741	29.971
M86	30.268
M87	30.268
M3914	30.268
M3915	30.268
M1977	30.268
M1978	31.161
M1979	31.161
M25132	31.161
M768	31.161
M770	31.161
M769	31.161
M8946	31.161
M17066	31.161
M17640	31.161
M15318	31.459
M16844	31.459
M16840	31.459
M11944	31.459
M7118	31.459
M19708	31.459
M19709	31.459
M19705	31.459
M19706	31.459
M19707	31.459
M12466	31.459
M12464	31.459
M12465	31.459
M12467	31.459
M7612	31.459
M7610	31.459
M7611	31.459
M7613	31.459
M7609	31.459
M16051	31.459
M240	31.459
M241	31.459
M21375	31.459
M8613	31.459
M8612	31.459
M1788	31.757
M2339	31.757
M2338	31.757
M16630	31.757
M16631	31.757
M8581	31.757
M2213	31.757
M511	31.757
M510	31.757
M18360	31.757
M18361	31.757
M19964	31.757
M19963	31.757
M2337	31.757
M22356	31.757
M1763	31.757
M13918	31.757
M23000	31.757
M15407	31.757
M9079	31.757
M9078	31.757
M28327	31.757
M28328	31.757
M28326	32.054
M8679	32.054
M20970	32.352
M4136	32.352
M14016	32.352
M13644	32.352
M13000	32.352
M17088	32.352
M10588	32.352
M10589	32.352
M9951	32.649
M13726	32.649
M10723	32.649
M10722	32.649
M10721	32.649
M1911	32.649
M11190	32.649
M11189	32.649
M11191	32.649
M11188	32.649
M9235	32.649
M3686	32.649
M3687	32.649
M3684	32.649
M3685	32.649
M6283	32.649
M6284	32.649
M20791	32.649
M22573	32.649
M22458	32.649
M22457	32.649
M18900	32.649
M9236	32.649
M17991	32.649
M22746	32.649
M16459	32.649
M8511	32.649
M13746	32.947
M22987	32.947
M14610	32.947
M4477	33.542
M3976	33.542
M3977	33.542
M3975	33.542
M3978	33.542
M2129	33.542
M16437	33.542
M11577	33.542
M20206	33.84
M11350	33.84
M16496	35.159
M16497	35.159
M7274	36.052
M7559	36.052
M14569	36.775
M19722	36.775
M19725	36.775
M19719	36.775
M19723	36.775
M19724	36.775
M19721	36.775
M19720	36.775
M7558	36.775
M14224	36.775
M17113	37.371
M7596	37.371
M7597	37.668
M7595	37.668
M17576	37.668
M5894	37.668
M15522	37.668
M6578	37.668
M14494	37.668
M23296	37.668
M22068	37.966
M17925	37.966
M17926	37.966
M24936	37.966
M22087	37.966
M20310	37.966
M21010	37.966
M10921	37.966
M49	37.966
M48	37.966
M1526	37.966
M1527	37.966
M1528	38.263
M1529	38.263
M10260	38.263
M4683	38.263
M13700	38.263
M17884	38.263
M1851	38.263
M4130	38.263
M14609	38.263
M25837	38.263
M12634	38.263
M4034	38.263
M14893	38.263
M107	38.263
M106	38.263
M10203	38.263
M10204	38.263
M14348	38.263
M21642	38.263
M4637	38.263
M15518	38.263
M15519	38.263
M589	38.263
M14154	38.263
M14173	38.263
M17895	38.263
M4523	38.263
M4320	38.263
M4321	38.263
M4322	38.263
M21673	39.454
M10385	39.454
M10384	40.25
M3377	40.25
M11784	40.548
M1432	40.548
M1433	40.548
M4645	40.548
M16997	40.548
M16998	41.143
M5839	41.143
M765	41.143
M18398	41.143
M18399	41.143
M18397	41.143
M13270	41.143
M13268	41.143
M13269	41.143
M13267	41.143
M10579	41.143
M12073	41.143
M9325	41.143
M9326	41.143
M9327	41.143
M9328	41.143
M9329	41.143
M1398	41.143
M1399	41.143
M1397	41.143
M12373	41.143
M12374	41.143
M12375	41.143
M12372	41.143
M4362	41.143
M2125	41.143
M2126	41.143
M15585	41.143
M15586	41.143
M5440	41.143
M20084	41.441
M16928	41.441
M16927	41.441
M6635	41.441
M9440	41.441
M18400	41.441
M18991	41.441
M18992	41.441
M19226	41.441
M10930	41.441
M16614	41.738
M8114	41.738
M8115	41.738
M8116	41.738
M514	41.738
M16756	41.738
M2858	42.036
M6399	42.036
M10269	42.333
M17177	42.333
M17176	42.333
M11329	42.333
M11330	42.333
M1702	42.929
M15771	42.929
M16615	43.226
M13140	43.226
M4671	44.417
M23303	44.417
M23726	44.715
M1147	44.715
M9944	44.715
M3853	45.608
M16193	45.608
M4941	45.905
M5680	45.905
M5679	48.049
M18038	48.049
M18694	48.773
M18695	48.773
M17851	48.773
M2626	48.773
M2628	48.773
M2627	48.773
M2629	48.773
M7583	48.773
M7584	48.773
M7582	48.773
M9518	48.773
M10812	49.07
M10813	49.07
M10814	49.07
M12427	49.07
M18264	49.07
M18263	49.07
M20273	49.07
M20272	49.666
M21301	49.666
M21299	49.666
M21300	49.666
M23276	49.666
M9519	49.666
M11186	49.666
M3711	49.666
M3712	49.666
M3713	49.666
M3714	49.666
M14037	49.963
M14038	49.963
M32223	49.963
M32222	51.452
M21436	51.452
M27705	51.452
M27703	51.452
M27704	51.452
M16245	51.452
M14492	51.452
M14896	51.452
M14897	51.75
M28658	51.75
M21871	51.75
M21872	51.75
M17852	51.75
M24198	51.75
M18380	51.75
M22954	51.75
M1722	51.75
M16133	51.75
M5842	51.75
M5843	51.75
M12323	52.047
M12324	52.047
M18381	52.047
M18382	52.047
M2579	52.047
M2578	52.047
M4932	52.047
M20965	52.047
M5916	52.345
M17424	52.345
M11759	52.345
M8936	53.238
M8935	53.238
M6178	53.238
M7606	53.833
M20278	53.833
M16260	53.833
M8550	53.833
M8551	53.833
M14921	53.833
M19666	53.833
M23335	55.024
M23334	55.024
M23080	55.024
M23081	55.024
M10842	55.33
M15920	55.33
M29969	55.33
M30705	55.926
M30704	55.926
M12771	55.926
M12770	55.926
M10966	56.223
M10967	56.223
M27690	57.414
M27689	57.414
M22594	58.307
M2011	58.307
M29067	58.605
M29065	58.605
M29533	58.605
M29066	58.605
M29068	58.605
M29530	58.902
M29531	58.902
M29532	58.902
M30492	58.902
M30493	58.902
M27976	58.902
M27973	58.902
M27974	59.2
M27975	59.2
M26323	59.2
M26324	59.2
M26326	62.897
M26325	62.897
M29354	63.195
M29355	63.195
M29356	63.195
M4236	63.492
M22088	63.492
M11846	63.492
M11844	63.492
M11845	63.492
M27694	63.492
M27695	64.385
M27696	64.385
M25401	64.683
M19897	64.683
M18804	64.683
M18803	64.683
M19859	64.683
M19858	64.98
M636	64.98
M2562	64.98
M2565	64.98
M2561	64.98
M2563	64.98
M2566	64.98
M2564	64.98
M11836	64.98
M11837	64.98
M11838	64.98
M11833	64.98
M11835	64.98
M11834	64.98
M1970	64.98
M15040	65.278
M12491	65.278
M12489	65.278
M27242	65.278
M12488	65.278
M26264	65.278
M26265	65.576
M26266	65.576
M28637	65.873
M28638	65.873
M28639	65.873
M20297	65.873
M20298	65.873
M28536	65.873
M28538	65.873
M28535	65.873
M28537	65.873
M10336	65.873
M10335	65.873
M10337	65.873
M26546	66.171
M26548	66.171
M26549	66.171
M26547	66.171
M28675	66.171
M28676	66.171
M28674	66.171
M27941	66.469
M27942	66.469
M27943	66.469
M28471	66.469
M28472	66.469
M28473	66.469
M28474	66.469
M27944	66.469
M28133	66.469
M28134	66.469
M28135	66.469
M33331	66.469
M33332	66.469
M33333	66.469
M33334	66.469
M29001	66.469
M29002	66.469
M28999	67.064
M29000	67.064
M28810	67.064
M28811	67.064
M28812	67.064
M28813	67.064
M28262	67.064
M28263	67.064
M28264	67.064
M28265	67.064
M26194	67.064
M26192	67.064
M26193	67.064
M10843	67.361
M10844	67.361
M10845	67.361
M5039	67.361
M3899	67.361
M3503	67.361
M3504	67.361
M3505	67.361
M28386	67.361
M28385	67.361
M28387	67.361
M25939	67.659
M25940	67.659
M25941	67.659
M25942	67.659
M28682	67.957
M28683	67.957
M28681	67.957
M29459	67.957
M29457	67.957
M29458	67.957
M27678	67.957
M27676	67.957
M27677	67.957
M26507	67.957
M26506	67.957
M26508	67.957
M26505	67.957
M28944	67.957
M28946	67.957
M28945	67.957
M26798	67.957
M26799	67.957
M26800	67.957
M29503	68.254
M29501	68.254
M29502	68.254
M28164	68.254
M28163	68.254
M28165	68.254
M28278	68.254
M28279	68.254
M28277	68.85
M29892	68.85
M29893	68.85
M29894	68.85
M29920	68.85
M29919	68.85
M29921	68.85
M3127	68.85
M28008	69.147
M28010	69.147
M28009	69.147
M29117	69.147
M29119	69.147
M29118	69.147
M29120	69.147
M13063	69.147
M23305	69.147
M23307	69.147
M23306	69.147
M23308	69.445
M23309	69.445
M32110	70.338
M1438	70.338
M24835	71.231
M19777	71.231
M19778	71.231
M27310	71.231
M27312	71.528
M27311	71.528
M10224	72.124
M10225	72.124
M10226	72.124
M15423	73.017
M15424	73.017
M3501	73.017
M3502	73.017
M32585	73.017
M5148	73.017
M5147	73.017
M23421	73.017
M24828	73.017
M32097	73.323
M12492	73.323
M33745	73.323
M21438	73.323
M21437	73.323
M675	73.621
M676	73.621
M30303	73.621
M30302	73.621
M10284	73.621
M15707	73.621
M15706	73.621
M8346	73.621
M14461	73.621
M14211	73.621
M33134	73.621
M20694	73.919
M20695	73.919
M3900	73.919
M3901	73.919
M31476	74.514
M19174	74.514
M30316	74.514
M30315	74.514
M11031	74.514
M1461	74.514
M22095	74.514
M16018	74.514
M22577	74.514
M18525	74.514
M11988	74.514
M25203	74.514
M23586	74.514
M9705	74.514
M34078	74.514
M16240	74.514
M1168	74.514
M20680	74.514
M16541	74.514
M19601	74.514
M1061	74.514
M6478	74.514
M6479	74.514
M776	74.514
M33085	74.514
M5415	74.514
M19449	74.514
M4406	74.514
M4407	74.514
M27180	74.514
M1925	74.514
M1926	74.514
M23777	74.514
M22995	74.514
M23679	74.514
M10240	74.514
M3806	74.514
M32172	74.514
M3688	74.514
M4630	74.514
M31469	74.514
M981	74.514
M982	74.514
M983	74.514
M984	74.514
M10625	74.514
M10626	74.514
M10627	74.514
M10628	74.514
M14156	74.514
M14157	74.514
M12625	74.514
M29235	74.514
M29236	74.514
M29237	74.514
M8699	74.514
M8700	74.514
M16851	74.514
M7469	74.514
M2227	74.514
M2228	74.514
M8558	74.514
M8559	74.514
M6233	74.514
M6234	74.514
M5041	74.514
M10239	74.514
M131	74.514
M14954	74.514
M14953	74.514
M4818	74.514
M4819	74.514
M15925	74.514
M13531	74.514
M28793	74.514
M28792	74.514
M31364	74.514
M31365	74.514
M28116	74.514
M21435	74.514
M11337	74.514
M31965	74.514
M31966	74.514
M2520	74.514
M32002	74.514
M32003	74.514
M1250	74.514
M21417	74.514
M7971	74.514
M7970	74.514
M29257	74.514
M4269	74.514
M12945	74.514
M4536	74.514
M14769	74.514
M33305	74.514
M33306	74.514
M139	74.514
M15123	74.514
M8566	74.514
M8567	74.514
M8565	74.514
M9804	74.514
M31359	74.514
M31360	74.514
M5808	74.514
M5809	74.514
M5807	74.514
M5806	74.514
M21108	74.514
M8563	74.514
M20862	74.514
M20863	74.514
M33317	74.514
M17504	74.514
M20890	74.514
M20856	74.514
M9812	74.514
M9811	74.514
M9809	74.514
M9810	74.514
M7480	74.514
M7481	74.514
M7482	74.514
M15183	74.514
M13224	74.514
M13225	74.514
M6254	74.514
M10544	74.514
M2098	74.514
M2099	74.514
M7349	74.514
M31900	74.514
M22903	74.514
M21416	74.514
M27128	74.812
M27129	74.812
M29549	74.812
M31614	74.812
M20778	74.812
M7024	75.109
M11492	75.109
M2740	75.109
M2741	75.109
M32103	75.407
M32102	75.407
M5146	75.407
M16368	75.407
M32374	75.407
M19980	75.407
M31654	75.407
M2408	75.407
M14032	75.407
M17634	75.407
M714	75.407
M8098	75.407
M8099	75.407
M33796	75.407
M25881	75.407
M27181	75.407
M26422	75.407
M26423	75.704
M32611	75.704
M33283	75.704
M878	75.704
M877	75.704
M30350	75.704
M33524	75.704
M18282	75.704
M14309	75.704
M14308	75.704
M31544	75.704
M13758	75.704
M9530	75.704
M26463	75.704
M26464	75.704
M26465	75.704
M4855	75.704
M19978	75.704
M19979	75.704
M283	76.002
M15402	76.002
M15401	76.002
M7726	76.002
M7727	76.002
M18199	76.002
M7725	76.002
M28195	76.002
M17721	76.002
M20053	76.002
M18283	76.002
M12118	76.002
M12119	76.002

## Sheet: LG9
SNP code in LG9	Genetic distance（cM）
M6408	0
M6407	0
M3691	0
M4168	0
M19206	3.039
M22770	3.039
M14920	4.29
M14919	4.29
M18568	4.29
M21561	4.29
M14330	4.29
M14331	4.29
M21560	4.29
M8170	4.29
M9976	4.29
M9975	4.29
M20313	4.29
M20314	4.29
M20312	4.29
M12066	4.29
M1579	4.29
M1281	4.587
M1280	4.587
M26110	4.587
M26112	4.587
M28024	4.587
M28025	4.587
M28026	4.587
M28027	4.587
M26109	4.587
M26111	4.587
M23617	4.587
M3231	4.587
M15389	4.587
M14109	4.587
M33611	4.587
M33610	4.587
M677	4.587
M16831	4.587
M17120	4.587
M168	4.587
M32805	4.587
M32806	4.587
M26133	4.587
M26131	4.587
M26132	4.587
M17230	4.587
M6624	4.587
M28867	4.587
M28866	4.587
M31925	4.587
M31924	4.587
M7107	4.587
M7106	4.587
M28937	4.587
M28935	4.587
M28936	5.54
M13009	5.54
M13010	5.837
M7325	5.837
M28857	5.837
M28856	6.135
M28858	6.135
M19609	6.135
M19273	6.135
M19272	6.135
M19274	7.088
M12552	7.088
M22455	7.088
M19931	8.04
M17562	8.04
M15555	8.338
M15556	8.338
M15649	8.635
M17855	8.635
M17915	8.635
M17914	8.933
M3693	8.933
M4053	9.788
M27424	9.788
M27426	9.788
M27425	9.788
M27423	9.788
M2655	9.788
M19813	10.086
M9037	10.086
M9040	10.086
M5024	10.086
M26136	10.086
M10739	10.086
M10741	10.086
M10740	10.086
M28834	10.086
M28832	10.086
M23147	10.681
M23149	10.681
M19472	10.681
M16611	10.681
M16612	10.681
M1789	10.681
M21088	10.681
M9226	10.681
M9224	10.681
M9225	10.681
M14292	10.681
M10743	10.681
M10742	10.681
M32807	10.681
M20217	10.681
M4865	10.681
M11427	10.681
M691	10.681
M8048	10.681
M1602	10.681
M1603	10.681
M11739	10.681
M17208	10.681
M17209	10.681
M4771	10.681
M12440	10.681
M4977	10.681
M17729	10.681
M17730	10.681
M5897	10.681
M8274	10.681
M10365	10.681
M18781	10.681
M18782	10.681
M15139	10.681
M15140	10.681
M15137	10.681
M15138	10.681
M693	10.681
M13822	10.681
M26570	10.681
M26569	10.979
M32648	10.979
M32647	10.979
M8024	10.979
M18928	10.979
M19675	10.979
M11716	10.979
M19579	10.979
M6289	10.979
M15233	10.979
M15234	10.979
M5277	10.979
M5278	10.979
M30073	10.979
M30074	11.277
M7699	11.277
M10688	11.277
M10211	11.277
M18406	11.277
M509	11.277
M18799	11.277
M18798	11.277
M19578	11.277
M6544	11.277
M12650	11.277
M25762	11.277
M17671	11.872
M17672	11.872
M23647	12.824
M23646	12.824
M31350	13.122
M31349	13.122
M2951	13.122
M12676	13.42
M2305	13.42
M21478	13.42
M10872	13.42
M6217	13.42
M13590	13.42
M1007	13.42
M1008	13.717
M16287	13.717
M18833	13.717
M18940	13.717
M14110	14.312
M7605	14.312
M15958	14.908
M20281	14.908
M15953	15.205
M14116	15.205
M14115	16.158
M2092	16.158
M3690	17.408
M3692	17.408
M20304	17.408
M2556	17.408
M2557	17.408
M6723	17.408
M1249	18.658
M32503	18.658
M8112	18.956
M8113	18.956
M29430	18.956
M29431	18.956
M29432	19.551
M15209	19.551
M3945	20.146
M3946	20.146
M29682	20.146
M3952	20.444
M5485	20.444
M4488	20.444
M4489	20.444
M20775	20.444
M14808	20.742
M14809	20.742
M14810	20.742
M4251	20.742
M4252	21.039
M23606	21.039
M7856	21.039
M14985	21.039
M14984	21.039
M26143	21.039
M7134	21.039
M7133	21.039
M9114	21.337
M1010	21.337
M32818	21.337
M18894	21.337
M4334	21.337
M9063	21.337
M9064	21.337
M7065	21.337
M7066	21.337
M7067	21.337
M7068	21.337
M3947	21.337
M4527	21.635
M23607	21.635
M5909	22.23
M5908	22.23
M9062	22.23
M32068	23.778
M7310	23.778
M7311	23.778
M1769	23.778
M8687	24.373
M24856	24.373
M7670	24.968
M18644	24.968
M18645	25.564
M19406	25.564
M5652	25.564
M5653	25.564
M15331	26.159
M9704	26.159
M1590	26.159
M25891	26.754
M2205	26.754
M9680	26.754
M9681	26.754
M9682	27.052
M9683	27.052
M28475	28.6
M19542	28.6
M19541	28.6
M6762	29.553
M14630	29.553
M14629	30.148
M14846	30.148
M17992	30.148
M17993	30.148
M10392	30.148
M10393	30.148
M8751	30.148
M2568	30.148
M13364	30.148
M10139	30.148
M10140	30.148
M8809	30.148
M1099	30.148
M12813	30.148
M1867	30.148
M1866	30.148
M1868	30.148
M13170	30.148
M9405	30.148
M14847	30.148
M14848	30.148
M3917	30.148
M227	30.148
M228	30.148
M20755	30.148
M8132	30.445
M8133	30.445
M8131	30.445
M2621	30.445
M2620	30.445
M1270	30.445
M12364	30.445
M12365	30.445
M16444	30.445
M8810	30.445
M8811	30.445
M20599	30.445
M14628	30.445
M8378	30.445
M8377	30.445
M8365	30.445
M8577	30.445
M8578	30.445
M15385	30.445
M3090	30.445
M6232	30.445
M3744	30.445
M3745	30.445
M783	30.445
M20195	30.445
M226	30.445
M16170	30.445
M24993	30.445
M24996	30.445
M9084	30.445
M11125	30.743
M6712	30.743
M16048	30.743
M16049	30.743
M16050	30.743
M4250	30.743
M17452	31.041
M23723	31.041
M12613	31.041
M7607	31.041
M7608	31.636
M5599	31.636
M5598	32.231
M27466	32.231
M27467	32.231
M14441	32.231
M16559	32.826
M16558	32.826
M33419	32.826
M18103	32.826
M31670	32.826
M13257	32.826
M13256	32.826
M13258	32.826
M11402	32.826
M11401	32.826
M14425	32.826
M24386	32.826
M10002	32.826
M5824	32.826
M3165	32.826
M867	32.826
M866	32.826
M5027	32.826
M1031	33.124
M1032	33.124
M2341	33.124
M17866	33.124
M13067	33.124
M26063	33.124
M26061	33.124
M26062	33.124
M17041	33.124
M11470	33.124
M7712	33.124
M4952	33.124
M28914	33.124
M28913	33.124
M28915	33.124
M24382	33.124
M24381	33.124
M21029	33.124
M9067	33.124
M9066	33.422
M32924	33.422
M3974	33.422
M4999	33.422
M4998	33.422
M6687	33.422
M2516	33.422
M16089	33.422
M16090	33.422
M8168	33.719
M8169	33.719
M467	33.719
M17089	33.719
M14914	33.719
M13630	33.719
M4954	33.719
M4953	33.719
M6414	33.719
M28381	33.719
M6117	33.719
M1969	33.719
M1968	33.719
M20403	33.719
M21713	33.719
M21712	33.719
M21917	33.719
M20402	33.719
M20122	33.719
M16924	33.719
M16925	33.719
M4997	33.719
M5066	33.719
M10634	33.719
M32020	33.719
M32021	33.719
M9256	33.719
M2546	33.719
M2547	33.719
M15278	33.719
M15276	33.719
M15277	33.719
M14064	33.719
M14956	33.719
M3972	33.719
M15224	33.719
M19695	33.719
M18035	33.719
M18036	33.719
M18037	33.719
M19488	33.719
M19489	33.719
M11699	33.719
M11700	33.719
M8266	33.719
M22822	33.719
M13171	33.719
M13172	33.719
M11928	33.719
M11929	33.719
M11927	33.719
M11931	33.719
M11930	33.719
M19652	33.719
M19653	33.719
M19651	33.719
M14915	33.719
M14916	33.719
M14917	33.719
M28189	33.719
M28190	33.719
M28191	33.719
M29637	33.719
M29638	33.719
M29639	34.017
M29640	34.017
M28932	34.017
M28933	34.017
M28934	34.017
M21355	34.017
M21354	34.017
M32261	34.315
M32259	34.315
M32260	34.315
M15756	34.315
M15755	34.315
M6088	34.315
M6089	34.315
M17090	34.315
M32133	34.315
M32134	34.315
M16575	34.315
M16576	34.315
M33159	34.315
M28091	34.315
M28092	34.315
M28093	34.315
M18649	34.315
M19975	34.315
M11701	34.315
M19545	34.315
M4636	34.315
M4635	34.315
M22560	34.315
M22561	34.315
M22524	34.315
M17103	34.315
M17104	34.315
M23644	34.315
M19460	34.315
M19459	34.315
M22779	34.315
M22778	34.315
M16134	34.315
M14351	34.612
M8164	34.612
M28501	34.91
M27909	34.91
M27910	34.91
M27908	34.91
M29417	34.91
M29418	35.336
M29416	35.336
M8267	35.633
M1582	35.633
M10556	35.633
M28500	35.633
M28499	36.229
M20596	36.229
M14840	36.229
M13656	36.229
M20426	36.229
M11874	36.229
M13192	36.229
M3043	36.229
M3044	36.229
M3045	36.229
M1538	36.229
M1537	36.229
M2753	36.229
M21422	36.229
M3642	36.229
M11681	36.229
M11682	36.229
M10972	36.229
M10973	36.229
M10974	36.229
M2120	36.229
M2121	36.229
M2122	36.229
M6349	36.229
M31455	36.526
M16136	36.526
M16135	36.526
M16137	36.526
M16138	36.526
M25913	36.526
M25911	36.526
M25912	36.526
M27983	36.526
M27984	36.526
M27985	36.526
M20563	37.121
M3170	37.121
M334	37.121
M8861	37.717
M8862	37.717
M25184	37.717
M21494	37.717
M8860	37.717
M32148	38.312
M13305	38.312
M6044	38.312
M6043	38.312
M19387	38.907
M7070	38.907
M7069	39.205
M24492	39.205
M24493	39.205
M24490	39.205
M24491	40.753
M24494	40.753
M10363	40.753
M11879	42.301
M831	42.301
M9626	42.301
M13579	42.301
M13136	42.301
M20377	42.301
M3088	42.301
M13344	42.301
M31831	42.301
M1248	42.301
M15536	42.599
M11405	42.599
M1677	42.599
M16945	42.599
M17606	42.896
M18188	42.896
M10310	43.194
M10311	43.194
M3863	43.194
M21107	43.194
M15537	43.194
M15538	43.194
M11895	43.194
M33042	43.194
M11250	43.194
M11443	43.492
M6613	43.492
M1023	43.492
M15494	43.492
M15495	43.492
M21615	43.492
M12602	43.492
M19956	43.789
M19204	43.789
M6501	43.789
M6500	43.789
M26611	43.789
M15259	43.789
M32630	43.789
M15118	43.789
M5173	43.789
M8366	43.789
M16714	43.789
M2690	43.789
M16869	43.789
M9436	44.384
M13908	44.384
M17552	44.384
M14031	44.384
M16124	44.384
M5254	44.384
M9247	44.384
M31327	44.384
M10511	44.384
M733	44.384
M33002	44.384
M3138	44.384
M16799	44.384
M315	44.384
M23059	44.384
M32603	44.384
M9927	44.384
M9928	44.384
M33477	44.384
M33476	44.384
M23283	44.682
M33003	44.682
M26823	44.682
M26822	44.682
M29674	44.682
M16979	44.682
M14543	44.682
M14544	44.682
M31974	44.682
M20283	44.682
M21406	44.682
M21405	44.682
M18167	44.682
M14538	44.682
M14539	44.682
M12630	44.682
M15088	44.682
M11827	44.682
M6591	44.682
M3161	44.682
M3162	44.98
M1697	44.98
M18567	44.98
M7129	44.98
M1694	44.98
M1693	44.98
M4906	44.98
M6012	44.98
M11142	44.98
M11143	44.98
M15033	44.98
M26917	44.98
M31446	44.98
M11398	44.98
M17028	44.98
M17029	44.98
M17030	44.98
M17031	44.98
M6491	44.98
M33146	44.98
M657	44.98
M658	44.98
M32074	44.98
M11878	44.98
M1952	44.98
M1953	44.98
M31527	44.98
M4951	44.98
M8356	44.98
M8357	44.98
M5893	44.98
M11034	44.98
M7450	44.98
M21443	44.98
M21444	44.98
M8678	44.98
M8677	44.98
M601	44.98
M10811	44.98
M21796	44.98
M1202	44.98
M1951	44.98
M14161	44.98
M11032	44.98
M11033	44.98
M11558	44.98
M3763	44.98
M2273	44.98
M1935	44.98
M10696	44.98
M22522	44.98
M17577	44.98
M10914	44.98
M10915	44.98
M5078	44.98
M3314	44.98
M10049	44.98
M10047	44.98
M10048	44.98
M9773	44.98
M4956	44.98
M19287	44.98
M19288	44.98
M19715	44.98
M14216	44.98
M6716	44.98
M27231	44.98
M6263	44.98
M18548	44.98
M18547	44.98
M6262	44.98
M14839	44.98
M14838	44.98
M7429	44.98
M21631	44.98
M30724	44.98
M9792	44.98
M9793	44.98
M11870	44.98
M21288	44.98
M10199	44.98
M2993	44.98
M2994	44.98
M21714	44.98
M8512	44.98
M6094	44.98
M6093	44.98
M11731	44.98
M11730	44.98
M22709	44.98
M23095	44.98
M23096	44.98
M20447	44.98
M4957	44.98
M20047	44.98
M2735	44.98
M32290	44.98
M18697	44.98
M18696	44.98
M16527	44.98
M5428	44.98
M9593	44.98
M1630	44.98
M19595	44.98
M6317	44.98
M2344	44.98
M6927	44.98
M573	44.98
M1245	44.98
M11473	44.98
M9127	44.98
M11324	44.98
M27132	44.98
M27130	45.277
M20159	45.277
M6826	45.873
M6971	45.873
M6972	45.873
M21027	45.873
M21026	45.873
M1533	45.873
M8801	45.873
M15565	45.873
M16782	45.873
M16783	45.873
M32356	45.873
M32357	45.873
M20331	45.873
M6369	45.873
M6368	45.873
M10635	45.873
M26571	45.873
M10404	45.873
M21674	45.873
M16367	45.873
M4187	45.873
M4188	45.873
M31761	45.873
M31760	45.873
M15288	45.873
M15289	45.873
M15290	45.873
M15292	46.17
M5499	46.17
M19220	46.17
M19219	46.17
M29429	46.17
M29428	46.17
M22554	46.468
M373	46.468
M374	46.468
M12563	46.468
M12564	46.765
M8075	46.765
M375	46.765
M21252	46.765
M28094	46.765
M33094	46.765
M33093	46.765
M13687	47.063
M33253	47.063
M33254	47.063
M6495	47.063
M6494	47.063
M32366	47.063
M2946	47.063
M2947	47.063
M2948	47.063
M6077	47.063
M4281	47.063
M4282	47.658
M6522	47.658
M11367	47.658
M16215	48.909
M18708	48.909
M4045	49.206
M4046	49.206
M31289	49.801
M9497	49.801
M11923	49.801
M5109	50.397
M5108	50.397
M9862	50.397
M9861	50.397
M16737	50.397
M16736	50.397
M9378	50.992
M9379	50.992
M9377	51.29
M14579	51.29
M9931	51.587
M18580	51.587
M24100	51.587
M13791	51.587
M17309	51.587
M17310	51.587
M17673	51.587
M14465	51.587
M14464	51.587
M2245	51.587
M2246	51.587
M15823	51.587
M9691	51.587
M15644	51.587
M6212	51.587
M6211	51.587
M8599	51.587
M33240	51.587
M4124	51.587
M35	51.587
M36	51.587
M10281	51.587
M9376	51.587
M19883	51.587
M19884	51.587
M15643	51.587
M15645	51.587
M5685	51.587
M5686	51.587
M10110	51.587
M10111	51.587
M312	51.587
M16674	51.587
M6731	51.587
M6732	51.587
M11173	51.587
M11174	51.587
M24253	51.587
M23694	51.587
M22717	52.48
M13664	52.48
M23254	52.778
M2991	52.778
M22008	53.671
M22009	53.671
M22049	54.266
M22650	54.266
M22649	54.266
M8634	55.814
M8635	55.814
M33718	57.005
M33717	57.005
M33884	57.005
M14927	57.312
M19276	57.312
M19277	57.312
M19278	57.312
M28743	57.312
M7404	57.312
M32036	57.312
M32037	57.312
M8991	57.312
M8990	57.907
M1565	57.907
M14663	57.907
M7401	57.907
M7402	59.753
M7403	59.753
M5082	60.051
M5080	60.051
M5081	61.599
M5079	61.599
M19955	64.399
M517	64.399
M16849	64.994
M16850	64.994
M17922	64.994
M17923	64.994
M17924	66.245
M20824	66.245
M12705	66.245
M29412	66.84
M29410	66.84
M29411	66.84
M24947	66.84
M18979	66.84
M18980	66.84
M15856	66.84
M10174	66.84
M7095	68.388
M15947	68.388
M14714	68.983
M15610	68.983
M7695	70.005
M6101	70.005
M4466	70.302
M4467	70.302
M3694	70.302
M23252	70.302
M14377	70.302
M21981	70.302
M16086	70.302
M2816	70.6
M20360	70.6
M14307	70.897
M13219	70.897
M6906	70.897
M4220	70.897
M9750	70.897
M177	70.897
M176	70.897
M6497	70.897
M25984	70.897
M33169	70.897
M19993	70.897
M28368	70.897
M10964	70.897
M582	70.897
M28370	71.323
M28369	71.323
M20416	71.63
M29233	71.63
M25985	71.63

## Sheet: LG10
SNP code in LG10	Genetic distance（cM）
M4048	0
M4049	0
M5129	0
M10301	0
M10304	0
M10302	0
M10476	0
M17994	0
M3428	0.426
M3591	0.426
M3590	0.426
M15855	4.602
M3589	4.602
M13823	5.555
M24427	5.555
M31982	5.555
M31981	5.852
M28523	5.852
M28522	5.852
M29754	5.852
M29753	5.852
M29752	6.15
M15507	6.15
M5361	6.15
M5360	6.15
M11755	7.102
M20317	7.102
M18284	7.102
M16863	7.102
M15296	7.102
M6098	7.102
M17887	7.102
M25351	7.102
M21941	7.102
M16432	7.102
M2368	7.102
M865	7.102
M863	7.102
M864	7.102
M13151	7.102
M9315	7.102
M5852	7.698
M2351	7.698
M21594	9.246
M19755	9.246
M13906	9.246
M13905	11.518
M13904	11.518
M4759	13.364
M4760	13.364
M3174	13.96
M6448	13.96
M5585	14.555
M4876	14.555
M4877	14.555
M3126	14.555
M11841	14.853
M7369	14.853
M1361	14.853
M1379	14.853
M1378	14.853
M5584	14.853
M5583	15.15
M4273	15.15
M6057	15.15
M3738	15.15
M3739	15.15
M3737	15.15
M10833	15.448
M6164	15.448
M6165	15.448
M6163	15.448
M16801	15.448
M16707	15.448
M16709	15.448
M16710	15.448
M16708	15.448
M29095	15.448
M29093	15.448
M29094	15.745
M27565	15.745
M27566	15.745
M27564	15.745
M17974	15.745
M4098	18.606
M11488	18.606
M13781	18.903
M13782	18.903
M13783	18.903
M21440	18.903
M3825	18.903
M3826	18.903
M9441	18.903
M9442	18.903
M3824	18.903
M7114	18.903
M7115	18.903
M7113	18.903
M29719	18.903
M4955	18.903
M10187	19.201
M10188	19.201
M29063	19.201
M29062	19.201
M29064	19.201
M13780	19.201
M32517	19.201
M10278	19.201
M10277	19.201
M33850	19.201
M15705	19.201
M28325	19.201
M9291	19.201
M21018	19.201
M10934	19.499
M9935	19.499
M9936	19.499
M27272	21.047
M3697	21.047
M16025	21.344
M16520	21.344
M16521	21.344
M33379	21.642
M33378	21.642
M4612	21.94
M4613	21.94
M2193	22.535
M17407	22.535
M17408	22.535
M11851	22.535
M17854	22.535
M17853	22.535
M30491	22.832
M3248	22.832
M12135	22.832
M14040	22.832
M14771	22.832
M14772	22.832
M4891	23.785
M32301	23.785
M3715	23.785
M628	24.737
M627	24.737
M4990	24.737
M9538	24.737
M9539	24.737
M4078	24.737
M27221	25.035
M14871	25.035
M15516	26.941
M7018	26.941
M33050	26.941
M32701	27.238
M32702	27.238
M503	27.536
M10595	27.536
M10594	27.536
M10537	27.536
M20332	27.536
M528	27.536
M10445	27.536
M4390	27.536
M7729	27.536
M7730	27.536
M4391	27.536
M1107	27.536
M4858	27.536
M10418	27.536
M14972	27.536
M14973	27.536
M16898	27.536
M1536	27.536
M10192	27.536
M10191	27.536
M600	27.536
M9729	27.834
M19582	27.834
M15973	27.834
M7265	27.834
M4965	27.834
M19109	28.131
M3647	28.131
M9	28.131
M7860	28.131
M21696	28.131
M22145	28.429
M22144	28.429
M22143	28.429
M18523	28.429
M18522	28.429
M18521	28.429
M18524	28.726
M16854	28.726
M17379	29.322
M17377	29.322
M19934	29.917
M19935	29.917
M11392	29.917
M29691	29.917
M29692	29.917
M29693	29.917
M17635	29.917
M17378	30.512
M29111	30.512
M29112	30.512
M9540	30.512
M10442	30.512
M10443	30.81
M10444	30.81
M26208	31.703
M26210	31.703
M26209	32
M29602	32
M29604	32
M29601	32.596
M29603	32.596
M11668	32.596
M33636	32.903
M27543	32.903
M27541	38.28
M27544	38.28
M29547	41.581
M29546	41.581
M29548	41.581
M25997	41.581
M25999	41.581
M25996	41.879
M25998	41.879
M29185	42.474
M29187	42.474
M29186	42.474
M27935	42.474
M27936	42.771
M27934	42.771
M12693	42.771
M12691	42.771
M23350	42.771
M23349	42.771
M26409	42.771
M26408	43.664
M26411	43.664
M26542	43.664
M26543	43.664
M26544	43.962
M26405	43.962
M26406	44.26
M26407	44.26
M26404	44.26
M24024	44.26
M13568	44.26
M13569	44.26
M13571	44.26
M13570	44.26
M27536	44.26
M27535	44.26
M27537	44.26
M27920	44.26
M27922	44.26
M27919	44.557
M27921	44.557
M6457	45.281
M6456	45.281
M29784	45.281
M29786	45.281
M29783	45.876
M29785	45.876
M29195	46.174
M29196	46.174
M29197	46.174
M16304	47.364
M16305	47.364
M16306	47.364
M16307	47.364
M15249	47.364
M15248	47.662
M15250	47.662
M11539	47.662
M11540	47.662
M11541	47.662
M1127	47.662
M1128	47.662
M1129	47.662
M1130	47.662
M21839	47.662
M21841	47.662
M21838	47.662
M21840	47.662
M12837	47.662
M12836	47.662
M12838	47.662
M12839	47.662
M22513	47.662
M22515	47.662
M22514	47.662
M18589	47.662
M18585	47.662
M18586	47.662
M18587	47.662
M18588	47.662
M18590	47.662
M20702	47.662
M20703	47.662
M20701	47.662
M20698	47.969
M20700	47.969
M20699	47.969
M19124	49.159
M19125	49.159
M19127	49.159
M19126	49.159
M26118	50.052
M26116	50.052
M17259	50.35
M17260	50.35
M17261	50.35
M24023	50.35
M24025	50.35
M12539	50.35
M12541	50.35
M12542	50.35
M12540	50.35
M29246	50.35
M29247	50.35
M21475	50.35
M1298	50.35
M1299	50.35
M1295	50.35
M1297	50.35
M1294	50.35
M1296	50.35
M20628	50.35
M20626	50.35
M20627	50.35
M9549	50.35
M9551	50.35
M9550	50.35
M9552	50.35
M2944	50.35
M7520	50.35
M7524	50.648
M345	50.648
M346	50.648
M348	52.196
M347	52.196
M12840	53.744
M18370	53.744
M22516	54.041
M15470	54.041
M11462	54.041
M11464	54.041
M1774	54.041
M3980	54.339
M3981	54.339
M13764	54.339
M13762	54.339
M13763	54.339
M13761	54.339
M27240	54.339
M27241	54.637
M16298	54.637
M4945	54.637
M3577	54.637
M28643	55.232
M28642	55.232
M28641	55.827
M29854	55.827
M17621	55.827
M15559	55.827
M15560	55.827
M217	55.827
M218	55.827
M15252	55.827
M15251	55.827
M7075	55.827
M164	55.827
M9608	55.827
M19487	55.827
M5508	55.827
M9097	55.827
M9096	55.827
M8916	55.827
M8915	55.827
M5075	55.827
M30490	55.827
M30489	55.827
M9623	55.827
M2112	55.827
M19507	55.827
M21248	55.827
M21987	55.827
M21988	55.827
M19508	55.827
M10435	55.827
M22681	55.827
M23372	55.827
M2175	55.827
M2176	55.827
M24202	55.827
M11354	55.827
M19513	55.827
M25421	55.827
M22487	55.827
M22488	55.827
M4285	55.827
M4284	55.827
M4283	55.827
M23582	55.827
M23583	55.827
M22716	55.827
M3181	55.827
M3180	55.827
M3179	55.827
M17648	55.827
M25430	55.827
M12736	55.827
M18069	55.827
M12533	55.827
M14796	55.827
M9280	55.827
M9281	55.827
M17144	55.827
M17143	55.827
M6787	55.827
M6788	55.827
M19205	55.827
M9609	55.827
M9610	56.125
M709	56.125
M1324	56.125
M19703	56.125
M19704	56.125
M11463	56.125
M7334	56.125
M816	56.125
M17060	56.125
M17061	56.125
M17062	56.125
M5033	56.125
M8876	56.125
M13974	56.125
M19748	56.125
M19749	56.125
M9990	56.125
M9991	56.125
M19074	56.125
M19073	56.125
M4837	56.125
M10250	56.125
M10249	56.125
M9727	56.125
M9728	56.125
M24155	56.125
M19351	56.125
M6397	56.125
M14445	56.125
M14446	56.125
M9707	56.125
M8788	56.125
M6231	56.125
M11070	56.125
M12309	56.125
M12308	56.125
M17328	56.125
M17973	56.125
M17972	56.125
M20691	56.125
M20692	56.125
M19667	56.125
M13915	56.125
M10016	56.125
M10017	56.125
M1731	56.125
M1730	56.125
M17999	56.72
M20311	56.72
M30354	56.72
M30355	56.72
M15716	56.72
M15717	56.72
M15718	56.72
M21194	56.72
M27407	56.72
M27406	56.72
M1872	56.72
M6028	56.72
M17344	56.72
M17345	56.72
M19491	56.72
M6335	56.72
M6334	56.72
M13903	56.72
M6877	56.72
M16346	56.72
M31992	56.72
M31993	56.72
M11635	56.72
M19111	56.72
M9422	57.315
M9423	57.315
M259	57.315
M260	57.315
M22284	57.315
M195	57.613
M197	57.613
M196	57.613
M31755	57.911
M31756	57.911
M12734	59.161
M12735	59.161
M16297	60.709
M3769	60.709
M21140	60.709
M21141	60.709
M20427	60.709
M28485	60.709
M28484	61.007
M11719	61.007
M13812	61.007
M8703	61.007
M11547	61.304
M11546	61.304
M9700	61.304
M9701	61.304
M18438	61.304
M18439	61.304
M2372	61.304
M2373	61.304
M2375	61.304
M2374	61.304
M16961	61.304
M8208	61.304
M8209	61.304
M3194	62.197
M16358	62.197
M22898	62.495
M22897	62.495
M2261	63.09
M2545	63.09
M17479	63.09
M22662	63.09
M11452	63.09
M31473	63.09
M15324	63.09
M14631	63.09
M24301	63.09
M22536	63.09
M22535	63.09
M14816	63.09
M31987	63.09
M7694	63.09
M2253	63.09
M11384	63.09
M11385	63.09
M19388	63.09
M19389	63.09
M15648	63.09
M16109	63.09
M362	63.09
M20646	63.09
M24269	63.388
M1282	63.388
M20200	63.388
M19812	63.388
M3683	63.685
M3682	63.685
M32432	63.685
M32433	63.685
M19745	63.685
M13972	63.983
M13973	63.983
M5519	63.983
M5520	63.983
M30628	63.983
M2931	63.983
M20848	63.983
M18005	63.983
M18004	63.983
M8268	64.578
M16486	64.578
M16485	64.578
M15400	64.578
M30307	64.876
M22658	64.876
M13942	64.876
M13943	64.876
M26410	64.876
M6990	65.173
M9433	65.173
M22781	65.173
M22780	65.173
M27551	65.173
M27553	65.173
M27552	65.173
M10119	65.173
M10120	65.173
M12107	65.173
M15060	65.173
M13734	65.173
M15596	65.173
M12556	65.173
M17304	65.173
M17303	65.173
M471	65.173
M472	65.173
M22237	68.273
M23124	68.273
M3047	68.273
M33600	69.523
M17362	69.523
M17363	70.118
M17361	70.118
M27002	71.964
M27005	71.964
M27004	71.964
M17516	72.56
M5062	72.56
M2096	72.857
M11412	72.857
M30476	72.857
M10834	73.155
M6864	73.155
M19312	73.155
M11220	73.155
M19580	73.155
M19581	73.155
M4298	74.405
M2418	74.405
M2419	74.405
M18440	76.907
M18441	76.907
M19982	79.051
M21853	79.051
M12766	79.944
M7185	79.944
M21195	82.088
M18753	82.088
M1482	83.637
M5783	83.637
M8367	83.637
M12858	83.637
M4693	83.934
M18240	83.934
M2859	83.934
M9487	83.934
M12762	83.934
M15353	83.934
M5870	83.934
M1738	83.934
M15114	83.934
M14358	83.934
M8873	83.934
M10507	83.934
M10508	83.934
M20894	83.934
M17856	83.934
M17857	83.934
M16516	84.827
M15012	84.827
M5017	85.253
M29156	85.253
M29155	85.253
M29158	85.253
M29157	85.253
M5429	85.848
M23655	85.848
M22547	86.443
M23903	86.443
M7381	86.443
M13142	87.634
M16330	87.634
M16329	87.634
M31963	88.825
M31964	88.825
M21893	89.42
M21895	89.42
M18672	90.015
M15489	90.015
M12429	90.015
M12428	90.015
M9302	90.015
M9303	90.015
M5174	90.015
M5175	90.313
M5025	90.313
M5026	90.313
M716	90.313
M715	90.313

[truncated: 1 more sheets: LG11]
